# Supplementary material for: Structure and function of the geldanamycin amide synthase from Streptomyces hygroscopicus
Source: Springer Nature journal article supplement (doi:10.1038/s41467-025-57013-3), 2025-03-12

## Supporting Information

1. Materials and Methods (protein expression, crystallization and assays)
  - 1.1 Expression of *Sh*GdmF
  - 1.2 Simulated structures of *Sh*GdmF and NAT1
  - 1.3 Parameter of refinement
  - 1.4 Binding affinity measurements of co-substrates
  - 1.5 Polder omit maps for the cocrystallized ligands
  - 1.6 Transformation of thioesters by *Sh*GdmF
  - 1.7 Binding assay for affinity estimation
  - 1.8 Comparison of loop modelling approaches
2. Materials and Methods (Synthesis)
3. Experimental Procedures (Synthesis)
  - 3.1 Truncated thioesters
  - 3.2 3-Hydroxyanilines
  - 3.3 Total synthesis of seco-acid derivatives **26**, **28** and **30**
4. Biotransformation of SNAC ester **27b**
5. References (Supporting Information)

**Attachment:** Copies of <sup>1</sup>H- and <sup>13</sup>C-NMR spectra



## 1.2 Simulated structures of *Sh*GdmF and NAT1

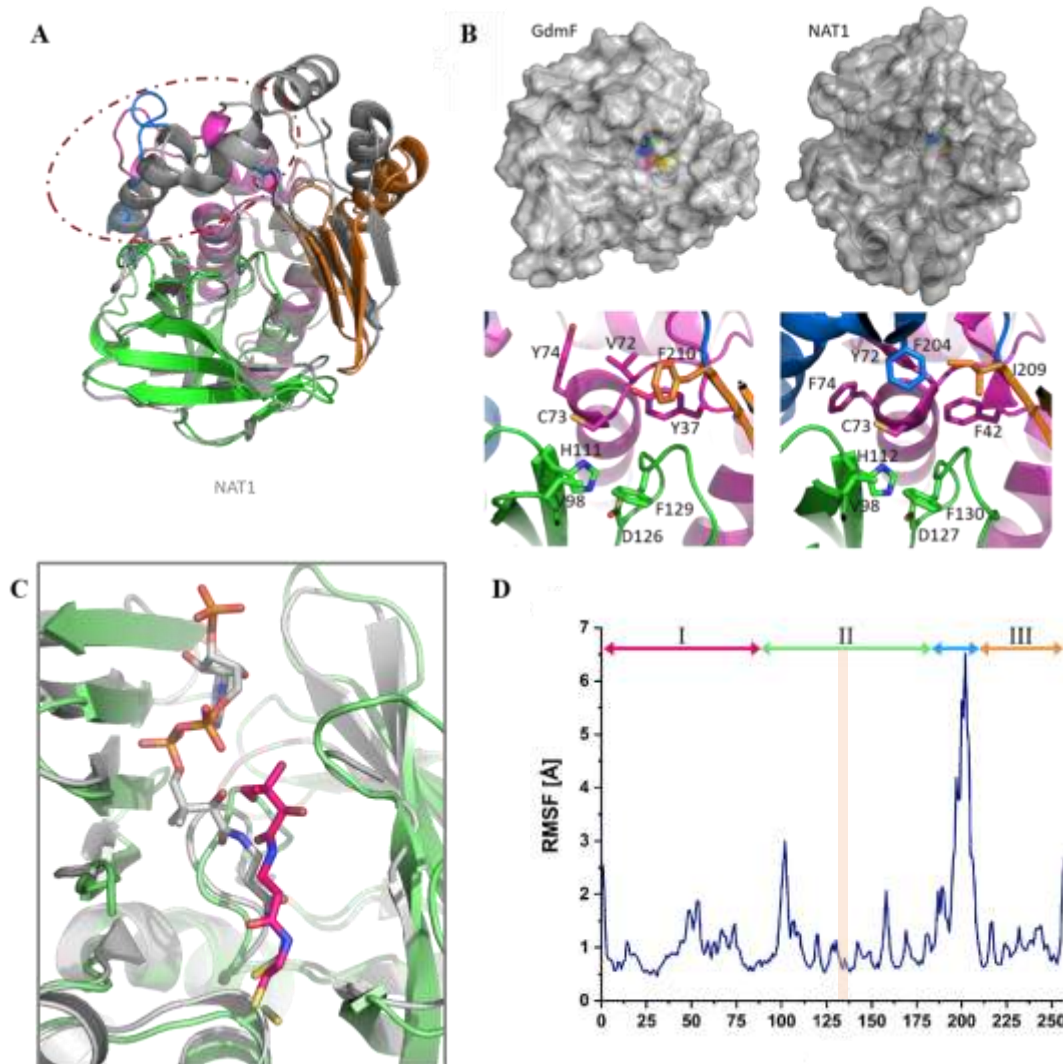

**Figure S2:** (A) Structure comparison of *Sh*GdmF (colored) superposed on *MINAT1* (grey). The largest differences between the two structures can be observed in the interdomain region (blue) and the C-terminal  $\alpha/\beta$ -lid (orange). (B) Surface representations (upper panels) and close-up views on the active sites (lower panels) of *Sh*GdmF and *MINAT1*. Note the widened active site cleft in GdmF. The catalytic triad is highlighted. (C) *Sh*Gdmf (green) in complex pantetheine (purple) superimposed on the structure of *MINAT1* (grey) with bound CoA (pdb: 4nv7). (D) Root mean square fluctuations (RMSF) along the 150 ns MD simulations reveal a drastically reduced flexibility of the P-loop (orange) in *Sh*GdmF as compared to *MINAT1*, allowing the P-loop to block the CoA binding site. Source data are provided as a Source Data file.

### 1.3 Parameter of refinement

**Table S1:** Data collection and refinement statistics.

|                             | apo <i>ShGdmF</i><br>8btm     | <i>ShGdmF</i> ·<br>13b<br>8oom | <i>ShGdmF</i> ·<br>11b<br>8osv |
|-----------------------------|-------------------------------|--------------------------------|--------------------------------|
| <b>Data collection</b>      |                               |                                |                                |
| Beamline                    | Soleil PX-2A                  | DESY P13                       | Soleil PX-2A                   |
| Space group                 | C2221                         | C2221                          | C2221                          |
| Wavelength [Å]              | 0.98                          | 0.98                           | 0.98                           |
| Cell parameters             |                               |                                |                                |
| a, b, c [Å]                 | 90.93, 144.22,<br>156.94      | 72.87, 96.18,<br>86.75         | 74.30, 95.29,<br>86.59         |
| $\alpha, \beta, \gamma$ [°] | 90, 90, 90                    | 90, 90, 90                     | 90, 90, 90                     |
| Rmerge [%]                  | 0.055 (1.139)                 | 0.086 (0.765)                  | 0.060 (1.141)                  |
| $I / \sigma I$              | 25.56 (2.00)                  | 13.04 (2.11)                   | 19.70 (1.89)                   |
| CC1/2                       | 1.00 (0.825)                  | 0.998 (0.72)                   | 0.999 (0.825)                  |
| Completeness<br>(%)         | 99.94 (99.88)                 | 99.29 (99.49)                  | 99.96 (99.92)                  |
| <b>Refinement</b>           |                               |                                |                                |
| Resolution [Å]              | 48.28 – 1.40<br>(1.45 – 1.40) | 48.27 – 1.82<br>(1.89 – 1.82)  | 43.30 – 1.28<br>(1.33 – 1.28)  |
| No. reflections             | 60043 (5906)                  | 27484 (2723)                   | 79128 (7821)                   |
| Rwork / Rfree               | 17.27 / 18.42                 | 17.02 / 19.60                  | 16.54 / 18.02                  |
| No. atoms                   | 2259                          | 2121                           | 2292                           |
| Protein                     | 2084                          | 2019                           | 2058                           |
| Ligand/ion                  | 16                            | 12                             | 29                             |
| Water                       | 159                           | 90                             | 205                            |
| B-factors [Å <sup>2</sup> ] | 23.94                         | 27.42                          | 23.50                          |
| Protein                     | 23.14                         | 27.09                          | 22.46                          |
| Ligand/ion                  | 46.62                         | 45.63                          | 43.74                          |
| Water                       | 32.20                         | 32.29                          | 31.07                          |
| R.M.S.<br>deviations        |                               |                                |                                |
| Bond lengths<br>[Å]         | 0.010                         | 0.015                          | 0.016                          |
| Bond angles [°]             | 1.19                          | 1.35                           | 1.42                           |

#### 1.4 Binding affinity measurements of co-substrates

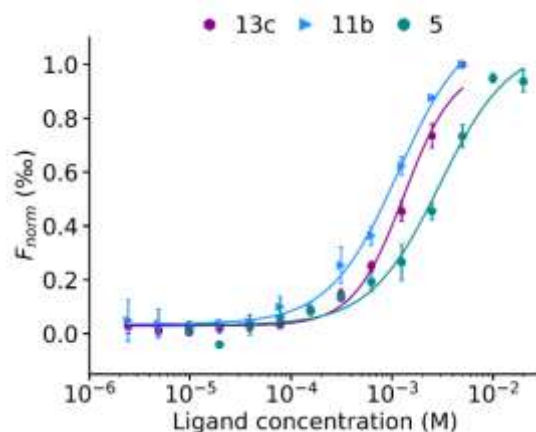

**Figure S3:** Binding affinity of co-substrates to GdmF as determined using microscale thermophoresis. SNAC co-substrate **11b** showed the highest binding affinity to GdmF with a  $K_d$  of 1.16 mM. A comparable affinity was determined for the pantetheine co-substrate **13c** with a  $K_d$  of 1.32 mM. Acetyl-CoA (**5**) showed a reduced binding affinity to GdmF with a  $K_d$  of 2.96 mM. Data are represented as mean  $\pm$  SD ( $n = 3$  independent experiments). Source data are provided as a Source Data file.

#### 1.5 Polder omit maps for the cocrystallized ligands

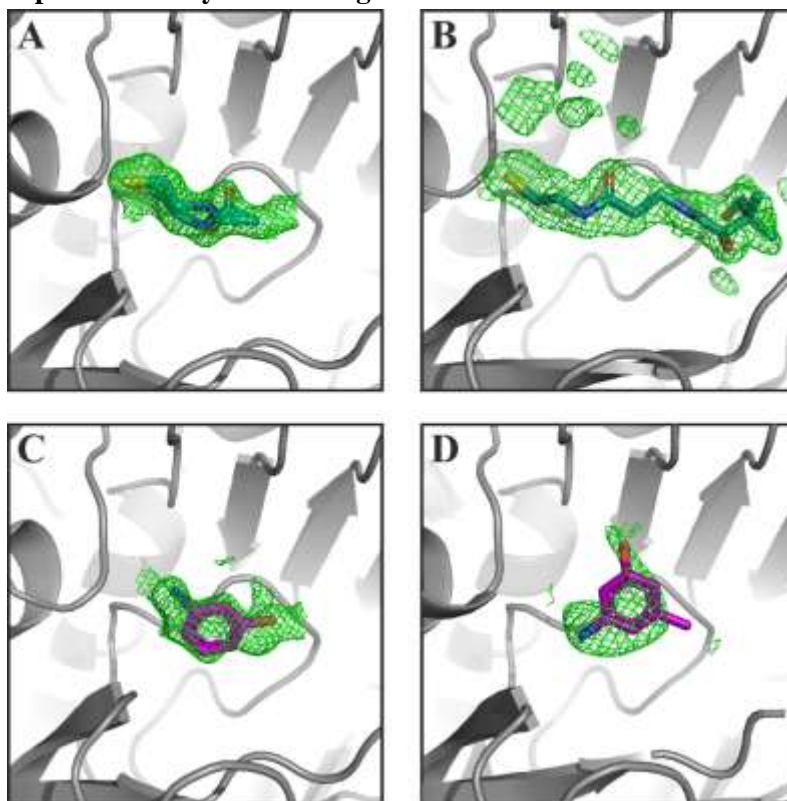

**Figure S4:** Polder omit maps (green), contoured at  $3\sigma$  clearly shows electron density for the co-crystallized (A) SNAC ligand, (B) pantetheine prosthetic arm, (C) 3-aminophenol **32**, and (D) aminophenol **33**. The electron density for the aminophenols is weak and does not cover the entire ligands.

### 1.6 Transformation of thioesters by *ShGdmF*

**Table S2:** Kinetic parameters for the substrate conversion of thioesters **11a-c** and **13a-c**, and aminophenols **32** and **33** by *ShGdmF* as obtained from photometric steady-state assays using Ellman's reagent.

| Compound                | + aminophenol <b>32</b> |                                |                                   |
|-------------------------|-------------------------|--------------------------------|-----------------------------------|
|                         | $K_M$ [ $\mu$ M]        | $k_{cat}$ [ $s^{-1}$ ]         | $k_{cat}/K_M$ [ $s^{-1} M^{-1}$ ] |
| <b>11a</b>              | $858.1 \pm 232.7$       | $0.0016 \pm 1.9 \cdot 10^{-4}$ | 1.87                              |
| <b>11b</b>              | $2735.0 \pm 610.3$      | $0.0071 \pm 7.0 \cdot 10^{-4}$ | 2.60                              |
| <b>11c</b>              | $2070.2 \pm 476.7$      | $0.0087 \pm 1.2 \cdot 10^{-3}$ | 4.20                              |
| <b>13a</b>              | $6413.6 \pm 2070.4$     | $0.0164 \pm 3.9 \cdot 10^{-3}$ | 2.56                              |
| <b>13b</b>              | $1136.8 \pm 136.9$      | $0.0027 \pm 1.3 \cdot 10^{-4}$ | 2.37                              |
| <b>13c</b>              | $3497.5 \pm 1289.9$     | $0.0016 \pm 3.1 \cdot 10^{-4}$ | 0.46                              |
| + aminophenol <b>33</b> |                         |                                |                                   |
| <b>11a</b>              | $1865.1 \pm 253.7$      | $0.0032 \pm 2.6 \cdot 10^{-4}$ | 1.72                              |
| <b>11b</b>              | $6902.4 \pm 4142.6$     | $0.0120 \pm 5.8 \cdot 10^{-3}$ | 1.74                              |
| <b>11c</b>              | $3669.8 \pm 1533.3$     | $0.0228 \pm 5.8 \cdot 10^{-3}$ | 6.21                              |
| <b>13a</b>              | $3648.3 \pm 2812.7$     | $0.0075 \pm 5.1 \cdot 10^{-3}$ | 2.06                              |
| <b>13b</b>              | $8267.7 \pm 1610.7$     | $0.0084 \pm 1.3 \cdot 10^{-3}$ | 1.02                              |
| <b>13c</b>              | $1712.8 \pm 475.5$      | $0.0013 \pm 1.7 \cdot 10^{-4}$ | 0.76                              |

### 1.7 Binding assay for affinity estimation

Although progeldanamycin (**2**) is the cyclization product of *ShGdmF*, we assumed that the more accessible and structurally similar geldanamycin (**3**) would also provide information on binding with *ShGdmF*, as is known to be the case with its target protein Hsp90, where ATP binding is the target site. The heat map (Figure S4; supporting information) reveals that Geldanamycin-FITC binds to GdmF and Hsp90 (Figure S4a, A, B, control), and ATP-Cy5 binds to Hsp90 (Figure S4a, C, control; supporting information).

Neither ATP nor geldanamycin bind to Hsp90 in the presence of the known Hsp-inhibitor radicicol **35** (Figure S4, B2, C2; supporting information), whereas the binding of geldanamycin-FITC to *ShGdmF* appears to be slightly increased. The displacement experiments show that thioesters **11a-c**, **13b** (Figure S4a) are differentially able to displace geldanamycin-FITC from *ShGdmF*, indicating that **11a**, **c** and little or no displacement activity with **11b**, **13b** and radicicol **34**, while **10a** enhances Gdm-FITC fluorescence. Thioesters **11a-c** showed little displacement activity on Hsp90. However, dose-response activities were not confirmed for aminophenols **32**, **33**, although the activity identified in Figure S3a and acetyl-CoA **34** with ATP-Cy5 on Hsp90 or with Gdm-FITC on *ShGdmF* tended to displace Gdm-FITC only at high concentrations  $>300 \mu$ M. Note that the fluorescence intensities were normalized to the control value, while the comparison of intensities between Hsp90a and *ShGdmF* showed a 50% higher binding activity of Gdm-FITC to Hsp90a. The lower susceptibility of *ShGdmF* could be due to a different open state or accessibility for the speckled protein. However, MST measurements with His tag



labelled *ShGdmF* gave only for **2** and **11c** stable dose-dependent activities with IC<sub>50</sub> values of  $819.21 \pm 233.16 \mu\text{M}$  and  $423.48 \pm 227.14 \mu\text{M}$ , respectively, (Figure S4b). A comparison of the KM and Kd values for **11c** shows that the Michaelis constant is greater than the dissociation constant indicating that the substrate is rapidly converted into a product. Stable binding data could only be obtained for **11c** and **2** suggesting that the other enzyme-substrate complexes are not stable enough for MST or microarray measurements. Interestingly, the difference of one CH<sub>2</sub> group, which is the difference between **11b** and **11c**, is sufficient for a stable enzyme-substrate complex.

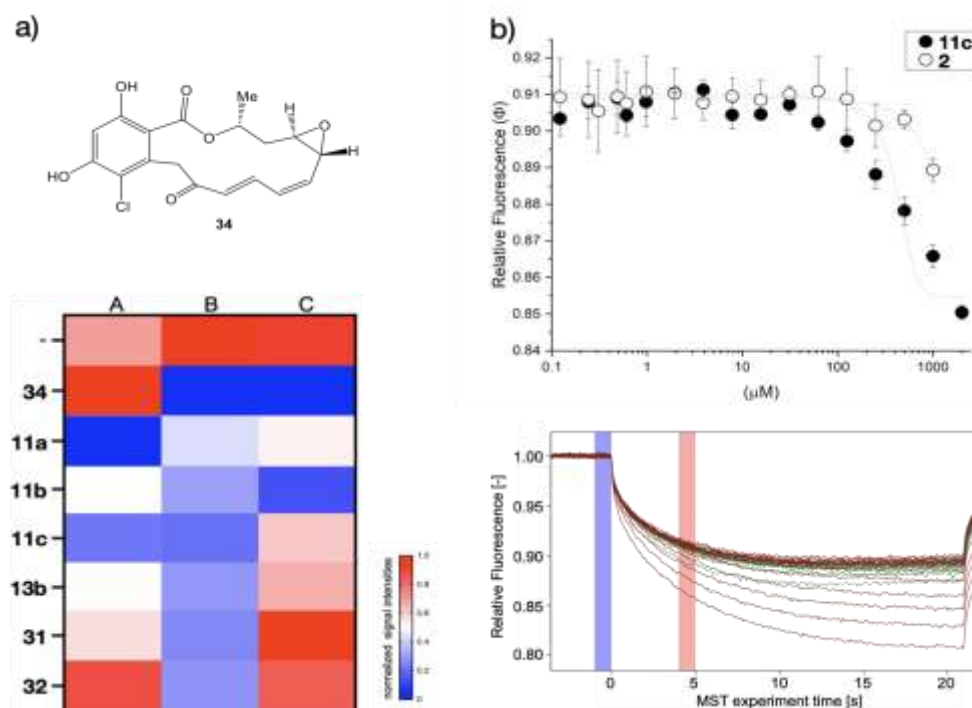

**Figure S5:** Microarray-based displacement activity on *ShGdmF* and Hsp90a and MST on *ShGdmF*. a) Binding of Gda-FITC (1  $\mu\text{M}$ ) on spotted *ShGdmF* (A) and Hsp90a (B) or binding of ATP-Cy5 on Hsp90a (C) analyzed with radicicol **35** (1  $\mu\text{M}$ ) or compounds **11a-c**, **13b**, **32**, **33** (10  $\mu\text{M}$ ) or without (-). b) Dose-responsive binding activity of **2** and **11c** on Cy5 His-tag labeled *ShGdmF* by typical MST (lower panel) with corresponding typical MST traces of compound **2** (green) and **11c** (red), respectively. MST-traces are displayed in the mode of Thermophoresis + T-jump. The color of blue and red bars in the figure represents F<sub>cold</sub> and F<sub>hot</sub> respectively, which show the positions of data collection.

## 1.8 Electron densities of the GdmF crystal structures

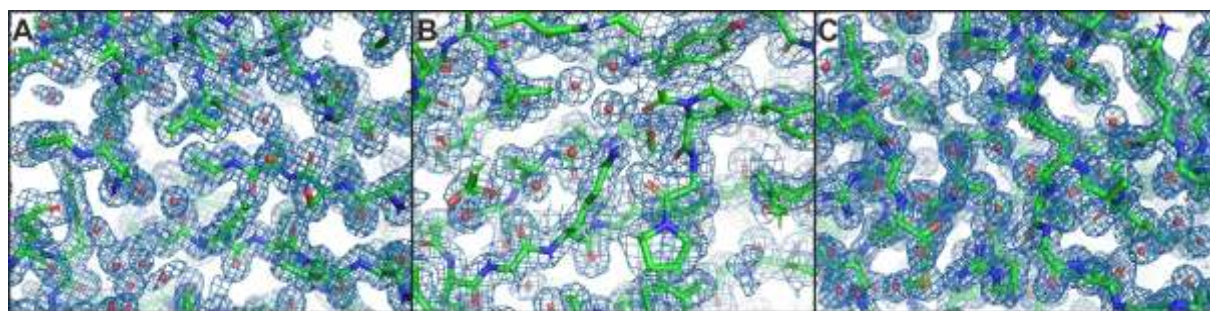

**Figure S6:** 2F<sub>o</sub>-F<sub>c</sub> electron densities maps of the three crystal structures of ligand-free GdmF (A, pdb 2btm), GdmF in complex with **13b** (B, pdb 8oom), and GdmF in complex with **11b** (C, pdb 8osv), countoured at 1 $\sigma$ .

## 1.9 Comparison of loop modelling approaches

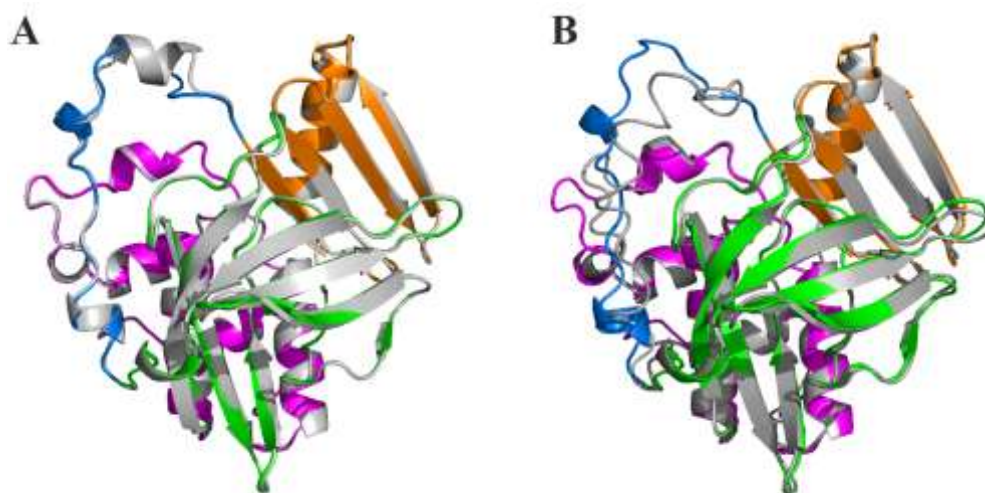

**Figure S7:** Comparison of different loop modelling strategies. (A) The missing interdomain loop was modelled using comparative modelling and refinement through restraint MD simulations with Modeller (colored protein). The conformation of the modelled interdomain region (blue) correlates well with knowledge-based loop modelling using Yasara (grey). (B) Comparison of the comparative modelled interdomain loop with the best machine learning generated model using AlphaFold (grey). The interdomain loop shows a slightly different conformation.

## 2. Materials and Methods (Synthesis)

**Reagents and solvents:** All non-aqueous reactions were carried out under an inert atmosphere (argon) with dried glassware, using standard techniques. Anhydrous solvents (such as MeCN, CH<sub>2</sub>Cl<sub>2</sub>) were obtained from a MB solvent purification system (MBRAUN) or commercial solvents were used. Petroleum ether (60 °C) and THF were distilled before application and triethylamine was dried over KOH and distilled as well. Commercial reagents were used as supplied.

**Thin layer chromatography (TLC):** Analytical thin-layer chromatography was performed on precoated aluminium-backed silica gel plates with a layer thickness of 0.2 mm. Visualization of the developed chromatogram was performed by UV absorbance (254 nm) and/or stained with aqueous potassium permanganate solution with subsequent heat treatment.

**Flash column chromatography:** Flash column chromatography was performed using mesh silica (grain size 40-63 μm), with the indicated solvent system according to the standard techniques. Alternatively, a BÜCHI purification system was applied containing two pump modules (C-605), a UV-Vis detector (C-630), a fraction collector (C-660) and the control unit C-620. The separation was performed with a Cartridge PP 12/150 column and a FC60 (60 x 20 mL) rack. The system was controlled via Sepacore® control software.

**Nuclear magnetic resonance (NMR) spectroscopy:** NMR spectra were recorded on a BRUKER Ultrashield 500 MHz with Avance-III HD console, an Ascend 400 MHz with Avance-III console, an Ascend 400 MHz with Avance-III HD console, an Ultrashield 400 MHz with Avance-I console and an Ascend 600 MHz with Avance Neo console.

Chemical shifts for <sup>1</sup>H-NMR spectra are recorded in parts per million from tetramethylsilane with the residual protic solvent resonance as the internal standard (CDCl<sub>3</sub>: δ 7.26 ppm, CD<sub>3</sub>OD: δ 3.31 ppm, (CD<sub>3</sub>)<sub>2</sub>SO: δ 2.50 ppm, C<sub>6</sub>D<sub>6</sub>: δ 7.16 ppm, D<sub>2</sub>O: δ 4.79 ppm, CD<sub>3</sub>CN: δ 1.94 ppm). Data are reported as follows: chemical shift (multiplicity [s = singlet, bs = broad singlet, d = doublet, dd = doublet of



doublets, t = triplet, q = quartet, quin = quintet, oct = octet and m = multiplet], coupling constant (in Hz), integration and assignment). All multiplet signals were quoted over a chemical shift range.

$^{13}\text{C}$ -NMR spectra are recorded with complete proton decoupling. Chemical shifts are reported in parts per million from tetramethylsilane with the solvent resonance as the internal standard ( $\text{CDCl}_3$ :  $\delta$  77.00 ppm,  $\text{CD}_3\text{OD}$ :  $\delta$  49.00 ppm,  $(\text{CD}_3)_2\text{SO}$ :  $\delta$  39.52 ppm,  $\text{C}_6\text{D}_6$ :  $\delta$  128.06 ppm,  $\text{CD}_3\text{CN}$ :  $\delta$  1.32 ppm, 118.26 ppm). The multiplicities are corresponding to the non-decoupled spectra and are described as follows: p = primary, s = secondary, t = tertiary, q = quaternary.

Assignments of  $^1\text{H}$ - and  $^{13}\text{C}$ -spectra were based upon the analysis of  $\delta$ - and  $J$ -values, as well as COSY, HMBC, HSQC and adequate experiments where appropriate.

**Mass spectrometry (MS):** High resolution mass spectrometry (HRMS) was measured with a Micromass LCT with lockspray source. The injection proceeded in loop-mode with a HPLC system by WATERS (Alliance 2695). Alternatively, mass spectra were recorded with a Acquity-UPLC system by WATERS in combination with a QTOF Premier mass spectrometer by WATERS in lockspray mode. The ionization happened by electrospray ionization (ESI) or by chemical ionization at atmospheric pressure (APCI). The calculated and found mass are reported.

**High performance liquid chromatography (HPLC):** Semi-preparative HPLC was performed using an Alliance 2695 HPLC-system by WATERS with a WATERS 996 diode array detector ( $\lambda$  = 200-350 nm) and a Nucleodur C18 HTec column (5  $\mu\text{m}$ , 250 mm,  $\varnothing$  8 mm) by MACHEREY-NAGEL. Mass detection was conducted with a WATERS Quattro micro API mass spectrometer in negative ionization mode.

Preparative HPLC was performed using a GILSON HPLC-system (pump 331/332) with additional MERCK HITACHI Split-Pump (L-6200A, UV-Vis detector L-4250) and a MACHEREY-NAGEL Nucleodur C18 ISIS column (5  $\mu\text{m}$ , 250 mm,  $\varnothing$  21 mm with guard cartridge, 40 mm,  $\varnothing$  21 mm). Mass detection was conducted with a WATERS Micromass ZQ mass spectrometer in negative ionisation mode. Operating conditions and retention times ( $t_R$ ) are reported in the experimental details.

**Melting points:** Melting points were determined on a SRS OptiMelt apparatus and are not corrected.

**Optical Rotation:** Specific optical rotation values  $[\alpha]_D$  were measured in a quartz cuvette on a polarimeter 341 by PERKINELMER at a wavelength of 589 nm (D) and given temperature  $t$ . Concentrations  $c$  are given in g/100 mL solvent.

**Freeze-pump-thaw-technique (fpt):** Degassed solvents were prepared by the fpt technique. For this, the appropriate dry solvent was placed under an argon atmosphere in a SCHLENK flask being connected to the SCHLENK line. The solvent was frozen in the flask using liquid nitrogen. Then the stopcock was opened to vacuum and the atmosphere was evaporated for 5 minutes. The flask was sealed and thawed until the solvent melted using an acetone bath being replaced by the cooling bath in order to repeat these steps until a gas evolution at the solution was no longer seen. A minimum of three cycles was needed. Subsequently, the flask was filled with argon gas and sealed. The solvent was ready to use.

### 3. Experimental Procedures (Synthesis)

#### 3.1 Truncated thioesters

##### 3.1.1 Pantetheine thioesters

##### Pantetheine dimethylketal (S1)

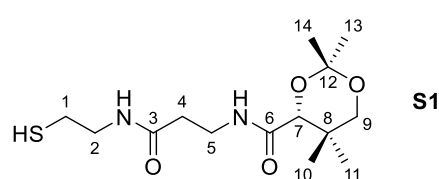

The pantetheine dimethyl ketal **S1** was prepared according procedure published protocol reported by Townsend *et al.*[S1] in 87 % yield (1.45 g, 4.57 mmol).  $^1\text{H}$ -NMR (400 MHz,  $\text{CDCl}_3$ ,  $\text{CHCl}_3$  = 7.26 ppm):  $\delta$  7.07 (s, 1H, NH), 6.62 (s, 1H, NH), 4.08 (s, 1H, H-7), 3.67 (d,  $J$  = 11.7 Hz, H-9), 3.61 – 3.36 (m, 4H, H-2, H-5) 2.27 (d,  $J$  = 11.7 Hz, H-9'), 2.66 (q,

$J = 6.8$  Hz, 2H, H-1), 2.51 (t,  $J = 6.0$  Hz, 2H, H-4), 1.45 (s, 3H, Me-12/13), 1.41 (s, 3H, Me-12/13), 1.03 (s, 3H, Me-10/11), 0.96 (s, 3H, Me-10/11);  $^{13}\text{C}$ -NMR (400 MHz,  $\text{CDCl}_3 = 77.16$  ppm):  $\delta$  171.2 (s, C-3), 170.4 (s, C-6), 99.2 (s, C-12), 77.3 (d, C-7), 71.5 (t, C-9), 42.6 (t, C-2), 36.2 (t, C-4), 35.0 (t, C-5), 33.1 (s, C-8), 29.6 (q, C-13/14), 24.6 (t, C-1), 22.2 (q, C-10/11), 19.0 (q, C-10/11), 18.8 (q, C-13/14); m.p. 100 °C, ref. [S1] 99-101 °C;  $[\alpha]_D^{24} +45.0$  ( $c = 0.9$ ,  $\text{CHCl}_3$ ), ref. [S1]  $[\alpha]_D^{24} +48.0$  ( $c = 1.0$ ,  $\text{CHCl}_3$ ); HRMS-ESI  $m/z$  for  $\text{C}_{14}\text{H}_{27}\text{N}_2\text{O}_5\text{S}$   $[\text{M}+\text{H}]^+$  calc. 319.1692, found: 319.1692.

### General procedure for the synthesis of acyl pantetheine dimethylketals

Pantetheine dimethyl ketal (0.155 g, 0.49 mmol, 1.0 eq.) was dissolved in  $\text{CH}_2\text{Cl}_2$  (3 mL) and the respective carboxylic acid (0.49 mmol, 1.0 eq.) was added. The mixture was cooled to 0 °C and DMAP (0.048 g, 0.39 mmol, 0.8 eq.) and EDC·HCl (0.187 g, 0.98 mmol, 2.0 eq.) were added subsequently. The mixture was then allowed to reach room temperature and stirred for 2 h. The reaction was terminated by addition of a 2 M HCl solution (8 mL), the layers were separated and the aqueous phase was extracted with  $\text{CH}_2\text{Cl}_2$  (3 x 3 mL). The combined organic layers were dried over  $\text{MgSO}_4$ , filtered and the solvent was removed under reduced pressure. The crude product was purified by flash column chromatography (100 % ethyl acetate).

### Acetyl pantetheine dimethylketal (S2Fehler! Verweisquelle konnte nicht gefunden werden.)

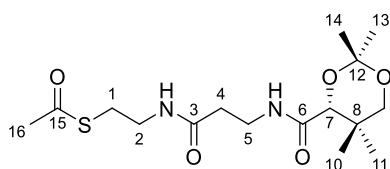

S2

Acetyl pantetheine dimethylketal (S2Fehler! Verweisquelle konnte nicht gefunden werden., 0.122 g, 0.38 mmol, 78 %) was obtained as a colorless oil.  $^1\text{H}$ -NMR (400 MHz,  $\text{CDCl}_3$ ,  $\text{CHCl}_3 = 7.26$  ppm):  $\delta$  7.02 (t,  $J = 6.3$  Hz, 1H, NH), 6.60 (bs, 1H, NH), 4.03 (s, 1H, H-7), 3.63 (d,  $J = 11.7$  Hz, 1H, H-9),

3.56 – 3.42 (m, 2H, H-5), 3.42 – 3.30 (m, 2H, H-2) 3.22 (d,  $J = 11.7$  Hz, 1H, H-9'), 2.96 (t,  $J = 6.6$  Hz, 2H, H-1), 2.40 (t,  $J = 6.2$  Hz, 2H, H-4), 2.30 (s, 3H, Me-16), 1.41 (s, 3H, Me-13/14), 1.37 (s, 3H, Me-12/13), 0.98 (s, 3H, Me-10/11), 0.92 (s, 3H, Me-10/11) ppm;  $^{13}\text{C}$ -NMR (400 MHz,  $\text{CDCl}_3 = 77.16$  ppm):  $\delta$  196.1 (s, C-15), 171.4 (s, C-3), 170.3 (s, C-6), 99.1 (s, C-12), 77.2 (d, C-7), 71.4 (t, C-9), 39.4 (t, C-2), 35.9 (t, C-4), 34.9 (t, C-5), 33.0 (s, C-8), 30.7 (q, C-16), 29.5 (q, C-13/14), 28.7 (t, C-1), 22.2 (q, C-10/11), 20.0 (q, C-10/11), 18.7 (q, C-13/14); HRMS-ESI  $m/z$  for  $\text{C}_{16}\text{H}_{28}\text{N}_2\text{O}_5\text{SNa}$   $[\text{M}+\text{Na}]^+$  calc. 383.1617, found: 383.1616.

### (E)-Pent-2-enoyl pantetheine dimethylketal (S3)

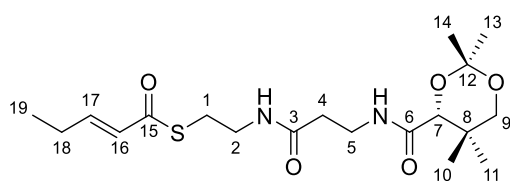

S3

(E)-Pent-2-enoyl Pantetheine dimethylketal (S3, 0.125 g, 0.31 mmol, 64 %) was obtained as a colorless oil.  $^1\text{H}$ -NMR (400 MHz,  $\text{MeOD-d}_4$ ,  $\text{MeOH} = 3.31$  ppm):  $\delta$  8.22 (bs, 1H, NH), 7.65 (bs, 1H, NH), 6.98 (dt,  $J = 15.4$ , 6.5 Hz, 1H, H-17), 6.16 (dt,  $J = 15.5$ , 1.7 Hz, 1H, H-16), 4.12 (s, 1H,

H-7), 3.73 (d,  $J = 11.7$  Hz, 1H, H-9), 3.48 – 3.43 (m, 2H, H-2), 3.35 (t,  $J = 6.6$  Hz, 2H, H-5), 3.26 (d,  $J = 11.6$  Hz, 1H, H-9'), 3.06 (t,  $J = 6.6$  Hz, 2H, H-1), 2.40 (t,  $J = 6.6$  Hz, 2H, H-4), 2.28 – 2.21 (m, 2H, H-18), 1.45 (s, 3H, Me-13/14), 1.44 (s, 3H, Me-13/14), 1.07 (t,  $J = 7.4$  Hz, 3H, H-19), 0.99 (s, 3H, Me-10/11), 0.97 (s, 3H, Me-10/11) ppm;  $^{13}\text{C}$ -NMR (400 MHz,  $\text{MeOD} = 49.00$  ppm):  $\delta$  191.0 (s, C-15), 173.8 (s, C-3), 172.1 (s, C-6), 148.8 (d, C-17), 128.6 (d, C-16), 100.4 (s, C-12), 78.4 (d, C-7), 72.3 (t, C-9), 40.2 (t, C-2), 36.3 (t, C-4), 36.1 (t, C-5), 34.0 (s, C-8), 29.7 (q, C-13/14), 28.9 (t, C-1), 26.2 (t, C-18), 22.4 (q, C-10/11), 19.4 (q, C-10/11), 19.0 (q, C-13/14), 12.5 (q, C-19); HRMS-ESI  $m/z$  for  $\text{C}_{19}\text{H}_{32}\text{N}_2\text{O}_5\text{SNa}$   $[\text{M}+\text{Na}]^+$  calc. 423.1921, found: 423.1920.

**(E)-2-Methylbut-2-enoyl pantetheine dimethylketal (S4)**

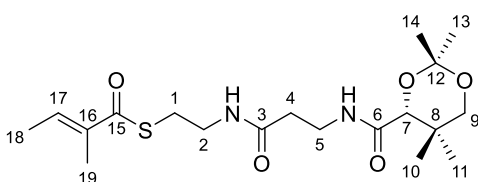 **S4** (*E*)-2-Methylbut-2-enoyl Pantetheine Dimethyl Ketal (**S4**, 0.143 g, 0.40 mmol, 81 %) was obtained as a colorless oil. The analytical data are consistent with those reported in the literature.[S2] <sup>1</sup>H-NMR (400 MHz, CDCl<sub>3</sub>, CHCl<sub>3</sub> = 7.26 ppm):  $\delta$  7.02 (t,  $J$  = 5.7 Hz, 1H, NH), 6.81 – 6.76 (m, 1H, H-17), 6.64 (bs, 1H, NH), 4.01 (s, 1H, H-7), 3.61 (d,  $J$  = 11.6 Hz, 1H, H-9), 3.49 – 3.36 (m, 4H, H-2, H-5), 3.20 (d,  $J$  = 11.6 Hz, 1H, H-9'), 2.98 (t,  $J$  = 6.5 Hz, 2H, H-1), 2.37 (t,  $J$  = 6.2 Hz, 2H, H-4), 1.79 (s, 3H, H-19), 1.76 (d,  $J$  = 7.1 Hz, 3H, H-18), 1.38 (s, 3H, Me-13/14), 1.35 (s, 3H, Me-13/14), 0.95 (s, 3H, Me-10/11), 0.90 (s, 3H, Me-10/11) ppm; <sup>13</sup>C-NMR (400 MHz, CDCl<sub>3</sub> = 77.16 ppm):  $\delta$  193.5 (s, C-15), 171.4 (s, C-3), 170.2 (s, C-6), 136.8 (d, C-17), 136.8 (q, C-16), 99.1 (s, C-12), 77.1 (d, C-7), 71.4 (t, C-9), 39.6 (t, C-2), 35.8 (t, C-4), 34.9 (t, C-5), 32.9 (s, C-8), 29.4 (q, C-13/14), 28.3 (t, C-1), 22.1 (q, C-10/11), 18.9 (q, C-10/11), 18.7 (q, C-13/14), 14.5 (q, C-18), 12.1 (q, C-19); HRMS-ESI  $m/z$  for C<sub>19</sub>H<sub>32</sub>N<sub>2</sub>O<sub>5</sub>SNa [M+Na]<sup>+</sup> calc. 423.1921, found: 423.1919.

**General procedure for the InCl<sub>3</sub>-mediated acetonide deprotection of acyl pantetheine dimethylketals to furnish acyl pantetheines[S3]**

Acyl pantetheine dimethylketal (1.0 eq.), InCl<sub>3</sub> (2.0 eq.) and H<sub>2</sub>O (4.0 eq.) were dissolved in MeCN (2 mL) and the mixture was stirred at r.t. for 4 h. The reaction was terminated by the addition of water and CH<sub>2</sub>Cl<sub>2</sub> (10 mL) was added. The layers were separated and the aqueous layer was extracted with CH<sub>2</sub>Cl<sub>2</sub> (2x10 mL). The combined organic phases were dried over MgSO<sub>4</sub>, filtered and concentrated. The crude product was purified by column chromatography (silica gel, CH<sub>2</sub>Cl<sub>2</sub>/MeOH = 30:1 → 15:1).

**Acetyl Pantetheine (13a)**

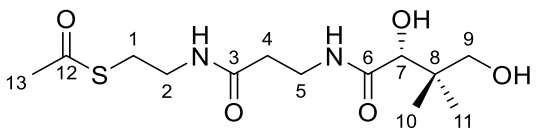 **13a** Acetyl pantetheine (**13a**, 25.0 mg, 0.078 mmol, 50 %) was obtained as a colorless oil. The analytical data are consistent with those reported in the literature.[S4] <sup>1</sup>H-NMR (400 MHz, MeOD-d<sub>4</sub>, MeOH = 3.31 ppm):  $\delta$  3.89 (s, 1H, H-7), 3.50 – 3.33 (m, 6H, H-2, H-5, H-9), 3.00 (t,  $J$  = 6.7 Hz, 2H, H-1), 2.41 (t,  $J$  = 6.7 Hz, 2H, H-4), 2.33 (s, 3H, Me-13), 0.92 (s, 6H, Me-10, Me-11) ppm; <sup>13</sup>C-NMR (400 MHz, MeOD-d<sub>4</sub> = 49.00 ppm):  $\delta$  197.0 (s, C-12), 176.1 (s, C-6), 173.9 (s, C-3), 77.3 (d, C-7), 70.3 (t, C-9), 40.4 (s, C-2), 40.0 (t, C-8), 36.4 (t, C-4), 36.3 (t, C-5), 30.5 (q, C-13), 29.4 (t, C-1), 21.3 (q, C-10/11), 20.9 (q, C-10/11); [ $\alpha$ ]<sub>D</sub><sup>20</sup> = + 19.2 ( $c$  = 0.8, MeOH), ref. [S4] [ $\alpha$ ]<sub>D</sub><sup>20</sup> = + 22.0 ( $c$  = 1.0, CHCl<sub>3</sub>); HRMS-ESI  $m/z$  for C<sub>13</sub>H<sub>24</sub>N<sub>2</sub>O<sub>5</sub>SNa [M+Na]<sup>+</sup> calc. 343.1304, found: 343.1303.

**(E)-Pent-2-enoyl pantetheine (13b)**

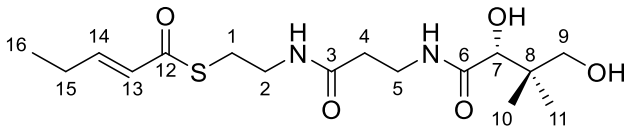 **13b** (*E*)-Pent-2-enoyl pantetheine (**13b**, 23.1 mg, 0.064 mmol, 32 %) was obtained as a colorless oil. <sup>1</sup>H-NMR (400 MHz, MeOD-d<sub>4</sub>, MeOH = 3.31 ppm):  $\delta$  6.89 (dt,  $J$  = 15.4, 6.5 Hz, 1H, H-14), 6.16 (dt,  $J$  = 15.5, 1.7 Hz, 1H, H-13), 3.89 (s, 1H, H-7), 3.53 – 3.33 (m, 6H, H-2, H-5, H-9), 3.06 (t,  $J$  = 6.7 Hz, 2H, H-1), 2.41 (t,  $J$  = 6.7 Hz, 2H, H-2), 2.29 – 2.21 (m, 2H, H-15), 1.08 (t,  $J$  = 7.4 Hz, 3H, H-16), 0.92 (s, 6H, H-10, H-11) ppm; <sup>13</sup>C-NMR (400 MHz, MeOD-d<sub>4</sub> = 49.00 ppm):  $\delta$  191.2 (s, C-12), 176.0 (s, C-6), 173.9 (s, C-3), 148.8 (d, C-14), 128.6 (d, C-13), 77.3 (d, C-7), 70.4 (t, C-9), 40.4 (t, C-8), 40.2 (s, C-2), 36.4 (t, C-4), 36.4 (t, C-5), 28.9 (t, C-1), 26.2 (t, C-15), 21.4 (q, C-10/11), 20.9 (q, C-10/11), 12.5 (q, C-16);

$[\alpha]_D^{20} = +22.7$  ( $c = 2.3$ , MeOH); HRMS-ESI  $m/z$  for  $C_{16}H_{28}N_2O_5SNa$   $[M+Na]^+$  calc. 383.1617, found: 383.1617.

### (*E*)-2-Methylbut-2-enoyl Pantetheine (13c)

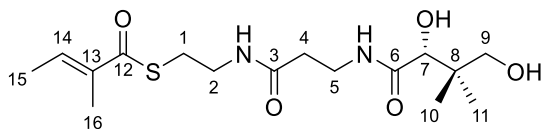

13c

(*E*)-2-Methylbut-2-enoyl pantetheine (**13c**, 37.6 mg, 0.104 mmol, 52 %) was obtained as a colorless oil. The analytical data are consistent with those reported in the literature [S2].

$^1H$ -NMR (400 MHz, MeOD- $d_4$ , MeOH = 3:31 ppm):  $\delta$  6.88 (q,  $J = 6.6$  Hz, 1H, H-14), 3.89 (s, 1H, H-7), 3.50 – 3.33 (m, 6H, H-2, H-5, H-9), 3.03 (t,  $J = 6.7$  Hz, 2H, H-1), 2.41 (t,  $J = 6.6$  Hz, 2H, H-4), 1.85 (s, 3H, H-16), 1.84 (d,  $J = 7.5$  Hz, 3H, H-15), 0.92 (s, 6H, Me-10, Me-11) ppm;  $^{13}C$ -NMR (400 MHz, MeOD- $d_4$  = 49.00 ppm):  $\delta$  194.4 (s, C-12), 176.1 (s, C-6), 173.9 (s, C-3), 138.2 (d, C-14), 137.6 (s, C-13), 77.3 (d, C-7), 70.3 (t, C-9), 40.4 (s, C-8), 40.2 (t, C-2), 36.4 (t, C-4), 36.3 (t, C-5), 29.0 (t, C-1), 21.3 (q, C-10), 21.0 (q, C-11), 14.4 (q, C-15), 12.1 (q, C-16) ppm;  $[\alpha]_D^{20} = +12.1$  ( $c = 0.9$ , MeOH); HRMS-ESI  $m/z$  for  $C_{16}H_{28}N_2O_5SNa$   $[M+Na]^+$  calc. 383.1617, found: 383.1616.

### 3.1.2 SNAC thioesters

#### General procedure for the synthesis of SNAC thioesters

*N*-Acetylcysteamine (238.4 mg, 2.0 mmol, 1.0 eq.) and the respective carboxylic acid (2.0 mmol, 1.0 eq.) were dissolved in  $CH_2Cl_2$  (10 mL) and cooled to 0 °C. Then, DMAP (48.9 mg, 0.40 mmol, 0.2 eq.) and EDC·HCl (383.4 mg, 2.0 mmol, 1.0 eq.) were added subsequently. The mixture was allowed to reach ambient temperature and stirring was continued for 3 h. The reaction was then terminated by addition of a 2 M HCl solution (5 mL) and the layers were separated. The aqueous phase was extracted with  $CH_2Cl_2$  (3 x 10 mL) and the combined organic phases were washed with a saturated aqueous  $NaHCO_3$  solution and brine, dried over  $MgSO_4$ , filtered and the solvent was removed under reduced pressure. The crude product was purified by flash column chromatography (PE/EA = 1:1 → 100 % EA).

#### Crotonyl-*N*-acetylcysteamine (11a)

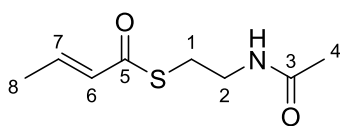

11a

Crotonyl-*N*-acetylcysteamine (**11a**, 285.0 mg, 1.52 mmol, 76 %) was obtained as a colorless solid. The analytical data are consistent with those reported in the literature. [S5]  $^1H$ -NMR (400 MHz,  $CDCl_3$ ,  $CHCl_3 = 7.26$  ppm):  $\delta$  6.89 – 6.83 (m, 1H, H-6), 6.28 (bs, 1H, NH), 6.10 (dq,  $J = 15.4, 1.6$  Hz, 1H, H-7), 3.40 – 3.37 (m, 2H, H-2), 3.05 – 3.01 (m, 2H, H-1), 1.92 (s, 3H, Me-4), 1.86 – 1.83 (m, 3H, Me-8) ppm;  $^{13}C$ -NMR (400 MHz,  $CDCl_3$  = 77.16 ppm):  $\delta$  190.0 (s, C-5), 170.5 (s, C-3), 141.7 (d, C-7), 129.9 (d, C-6), 39.7 (t, C-2), 28.1 (t, C-1), 23.1 (q, C-4), 18.0 (q, C-8); m.p. 60 °C; ref. [S6] 61.5 – 62 °C; HRMS-ESI  $m/z$  for  $C_8H_{13}NO_2SNa$   $[M+Na]^+$  calc. 210.0565, found: 210.0565.

#### (*E*)-2-Methylbut-2-enoyl-*N*-acetylcysteamine (11b)

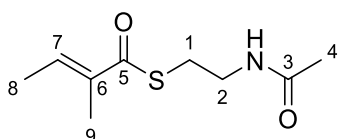

11b

(*E*)-2-Methylbut-2-enoyl-*N*-acetylcysteamin (**11b**, 292.5 mg, 1.45 mmol, 73 %) was obtained as a colorless oil. The analytical data are consistent with those reported in the literature.[S2]  $^1H$ -NMR (400 MHz,  $CDCl_3$ ,  $CHCl_3 = 7.26$  ppm):  $\delta$  6.85 (dq,  $J = 6.9, 1.1$  Hz, 1H, H-7), 6.04 (bs, 1H, NH), 3.42 (dt,  $J = 6.1, 6.0$  Hz 2H, H-2), 3.04 (t,  $J = 6.4$  Hz, 2H, H-1), 1.95 (s, 3H, Me-4), 1.85 (s, 3H, Me-9), 1.82 (d,  $J = 6.9$  Hz, 3H, Me-8) ppm;  $^{13}C$ -NMR (400 MHz,  $CDCl_3$  = 77.16 ppm):  $\delta$  193.4 (s, C-5), 170.6 (s, C-

3), 136.7 (d, C-7), 136.5 (s, C-6), 39.5 (t, C-2), 28.2 (t, C-1), 22.9 (q, C-4), 14.3 (q, C-9), 12.0 (q, C-8); HRMS-ESI  $m/z$  for  $C_9H_{15}NO_2SNa$   $[M+Na]^+$  calc. 224.0721, found: 224.0721.

### (E)-2-Methylpent-2-enoyl-*N*-acetylcysteamin (**11c**)

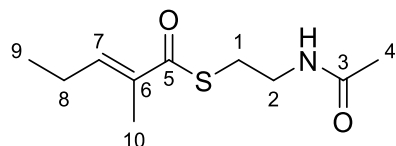

**11c**

(*E*)-2-Methylpent-2-enoyl-*N*-acetylcysteamin (**11c**, 272.0 mg, 1.26 mmol, 63 %) was obtained as a colorless oil. The analytical data are consistent with those reported in the literature.[S7]  $^1H$ -NMR (400 MHz,  $CDCl_3$ ,  $CHCl_3$  = 7.26 ppm):  $\delta$  6.74 (dt,  $J$  = 7.5, 1.1 Hz, 1H, H-7), 6.00 (bs, 1H, NH), 3.43 (q,  $J$  = 6.1 Hz, 2H, H-2), 3.05 (t,  $J$  = 6.4 Hz, 2H, H-1), 2.25 – 2.18 (m, 2H, H-8), 1.95 (s, 3H, Me-4), 1.86 (s, 3H, Me-10), 1.06 (t,  $J$  = 7.5 Hz, 3H, Me-9) ppm;  $^{13}C$ -NMR (400 MHz,  $CDCl_3$  = 77.16 ppm):  $\delta$  194.1 (s, C-5), 170.8 (s, C-3), 143.6 (d, C-7), 135.3 (s, C-6), 40.0 (t, C-2), 28.3 (t, C-1), 23.2 (q, C-4), 22.2 (t, C-8), 13.0 (q, C-9), 12.4 q, C-10); HRMS-ESI  $m/z$  for  $C_{10}H_{17}NO_2SNa$   $[M+Na]^+$  calc. 238.0878, found: 238.0876.

## 3.2 3-Hydroxyanilines

### 3-Amino-5-methylphenol (**33**)

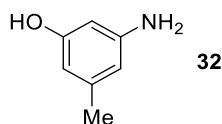

**32**

5-Methylresorcinol (2.1 g, 16.92 mmol, 1.0 eq.) was dissolved in water (10 mL) and ammonium chloride (1.5 g, 28.04 mmol, 1.7 eq.) and aqueous ammonia (28 %, 5.8 mL) were added. The mixture was heated in an autoclave to 180 °C and stirred for 17 h. The mixture was extracted with ethyl acetate (3 x 15 mL) and the combined organic layers were dried over  $MgSO_4$ , filtered and the solvent removed under reduced pressure. The crude product was purified by flash column chromatography (PE/EA = 3:1) to yield 3-amino-5-methylphenol (**33**) as a brown solid (0.96 g, 4.02 mmol, 52 % brsm). The analytical data are consistent with those reported in the literature.[S8]  $^1H$ -NMR (400 MHz,  $DMSO-d_6$ ,  $DMSO$  = 2.50 ppm):  $\delta$  8.69 (s, 1H, OH), 5.83 – 5.82 (m, 1H, HAr), 5.81 – 5.80 (m, 1H, HAr), 5.76 – 5.75 (m, 1H, HAr), 4.77 (s, 2H,  $NH_2$ ), 2.04 (s, 3H, Me) ppm;  $^{13}C$ -NMR (400 MHz,  $DMSO-d_6$  = 39.52 ppm):  $\delta$  158.0 (s, CAr), 149.5 (s, CAr), 138.5 (s, CAr), 106.3 (d, CAr), 104.4 (d, CAr), 98.4 (d, CAr), 21.3 (q, Me); m.p. 137 °C; ref. [S8] 138 °C.

## 3.3 Total synthesis of seco-acid derivatives **26**, **28** and **30**

### 3.3.1 Total synthesis of western fragment **19**

#### *tert*-Butyl {3-[(*tert*-butyldiphenylsilyl)oxy]-5-(iodomethyl)phenyl}carbamate (**S5**)

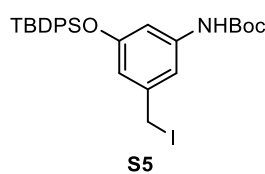

**S5**

$PPh_3$  (9.73 g, 37.0 mmol, 1.2 eq.) and imidazole (2.53 g, 37.0 mmol, 1.2 eq.) were dissolved in  $CH_2Cl_2$  (300 mL) at room temperature. The reaction was cooled to 0 °C and iodine (9.39 g, 37.0 mmol, 1.2 eq.) was added in the absence of light. Stirring was continued at this temperature for 30 minutes. Benzylic alcohol **37** (14.7 g, 30.8 mmol, 1.0 eq.) dissolved in  $CH_2Cl_2$  (50 mL) was added via canula. The reaction was stirred at 0 °C for 4 h. Silica gel was added and the solvent was removed under reduced pressure. The crude product was purified by flash column chromatography (PE/EtOAc = 10:1  $\rightarrow$  6:1) to yield benzylic iodide **S5** (16.29 g, 27.72 mmol, 90%) as a pale-yellow oil. The analytical data are consistent with those reported in the literature.

$R_f$  = 0.7 (PE/EtOAc = 4:1);  $^1H$ -NMR (400 MHz,  $CDCl_3$ ,  $CHCl_3$  = 7.26 ppm):  $\delta$  7.71 – 7.69 (m, 4H, TBDPS), 7.43 – 7.36 (m, 6H, TBDPS), 7.12 (bs, 1H, CAr), 6.55 – 6.54 (m, 1H, CAr), 6.40 – 6.39 (m, 1H, CAr), 6.25 (bs, 1H, NH), 4.18 (s, 2H,  $CH_2I$ ), 1.48 (s, 9H, Boc), 1.09 (s, 9H, TBDPS) ppm;  $^{13}C$ -NMR (400 MHz,  $CDCl_3$ ,  $CDCl_3$  = 77.16 ppm):  $\delta$  156.2 (s, CAr), 152.5 (s, Boc), 140.9 (s, CAr), 139.5 (s, CAr), 135.6 (d, 4C, TBDPS), 132.7 (s, 2C, TBDPS), 130.1 (d, 2C, TBDPS), 128.0 (d, 4C, TBDPS), 115.1 (d,



C<sub>Ar</sub>), 111.7 (d, C<sub>Ar</sub>), 109.5 (d, C<sub>Ar</sub>), 80.8 (s, Boc), 28.4 (q, 3C, Boc), 26.6 (q, 3C, TBDPS), 19.6 (s, TBDPS), 5.5 (t, CH<sub>2</sub>I) ppm; HRMS-ESI  $m/z$  for C<sub>28</sub>H<sub>34</sub>INO<sub>3</sub>SiNa [M+Na]<sup>+</sup> calc. 610.1250, found 610.1248.

***tert*-Butyl {3-[(*R*)-3-[(*S*)-4-benzyl-2-oxooxazolidin-3-yl]-2-methyl-3-oxopropyl]-5-[(*tert*-butyldiphenylsilyl)oxy]phenyl}carbamate (**15**)**

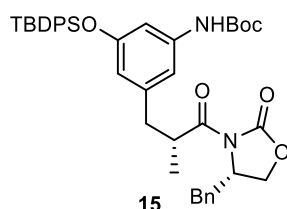

DIPA (1.29 mL, 9.24 mmol, 1.7 eq.) was dissolved in THF (25 mL) and cooled to  $-78^{\circ}\text{C}$ . *n*-BuLi (2.5 M in hexane, 3.69 mL, 9.24 mmol, 1.7 eq.) was added slowly and stirring was continued at  $-78^{\circ}\text{C}$  for 5 min. (*S*)-Oxazolidinone **20** (2.16 g, 9.24 mmol, 1.7 eq.) was added as a solution in THF (20 mL) via cannula. Stirring was continued for 15 min at  $-78^{\circ}\text{C}$ . Iodide **S5** (3.19 g, 5.44 mmol, 1.0 eq.) was added as a solution in THF (30 mL) via cannula. The reaction was stirred at  $-78^{\circ}\text{C}$  for 15 min and

then slowly warmed to  $-35^{\circ}\text{C}$  over 2.5 h. The reaction was terminated by the addition of an aqueous saturated NH<sub>4</sub>Cl solution. The phases were separated and the aqueous phase was extracted with EtOAc (6 x 75 mL). The combined organic phases were dried over MgSO<sub>4</sub>, filtered and the solvent was removed under reduced pressure. The crude product was purified by flash column chromatography (PE/EtOAc = 10:1  $\rightarrow$  2:1) to yield **15** (3.14 g, 4.53 mmol, 83%) as a yellow foam.

$R_f$  = 0.2 (PE/EtOAc = 4:1); <sup>1</sup>H-NMR (400 MHz, CDCl<sub>3</sub>, CHCl<sub>3</sub> = 7.26 ppm):  $\delta$  7.71 – 7.68 (m, 4H, TBDPS), 7.43 – 7.24 (m, 9H, TBDPS, Bn), 7.12 – 7.10 (m, 2H, Bn), 6.86 (bs, 1H, H<sub>Ar</sub>), 6.73 (bs, 1H, NH), 6.29 (m, 1H, H<sub>Ar</sub>), 6.25 (bs, 1H, H<sub>Ar</sub>), 4.67 – 4.61 (m, 1H, CHBn), 4.18 – 4.10 (m, 2H, CH<sub>2</sub>CHBn), 3.86 – 3.81 (m, 1H, C-14), 3.16 (dd,  $J$  = 13.4, 3.2 Hz, 1H, Bn), 2.93 (dd,  $J$  = 13.2, 6.2 Hz, 1H, C-15), 2.60 (dd,  $J$  = 13.4, 9.5 Hz, 1H, Bn), 2.33 (dd,  $J$  = 13.2, 8.4 Hz, 1H, C-15), 1.45 (s, 9H, Boc), 1.07 (s, 9H, TBDPS), 0.93 (d,  $J$  = 6.7 Hz, 3H, Me-14) ppm; <sup>13</sup>C-NMR (400 MHz, CDCl<sub>3</sub>, CDCl<sub>3</sub> = 77.16 ppm):  $\delta$  176.6 (s, C-13), 156.1 (s, C<sub>Ar</sub>), 153.1 (s, Aux), 152.5 (s, Boc), 140.9 (s, C<sub>Ar</sub>), 139.3 (s, C<sub>Ar</sub>), 135.7 (d, 4C, TBDPS), 135.6 (s, Bn), 133.0 (s, 2C, TBDPS), 132.9 (d, Bn), 129.9 (d, 2C, TBDPS), 129.5 (d, Bn), 129.0 (d, Bn), 127.9 (d, 4C, TBDPS), 127.8 (d, Bn), 127.4 (d, Bn), 115.8 (d, C<sub>Ar</sub>), 112.2 (d, C<sub>Ar</sub>), 108.2 (d, C<sub>Ar</sub>), 80.5 (s, Boc), 66.1 (t, CH<sub>2</sub>O), 55.3 (d, CHN), 39.7 (s, Bn), 39.5 (d, C-14), 38.0 (t, C-15), 28.4 (q, 3C, Boc), 26.6 (q, 3C, TBDPS), 19.6 (s, TBDPS), 16.2 (q, Me-14) ppm;  $[\alpha]_D^{20}$  =  $-2.4$  ( $c$  = 1.0, CHCl<sub>3</sub>); HRMS-ESI  $m/z$  for C<sub>41</sub>H<sub>48</sub>N<sub>2</sub>O<sub>6</sub>SiNa [M+Na]<sup>+</sup> calc. 715.3179, found 715.3179.

**(2*R*)-3-[3-(*tert*-Butoxycarbonylamino)-5-(*tert*-butyldiphenylsiloxy)-phenyl]-2-methyl-propan-1-ol (**S6**)**

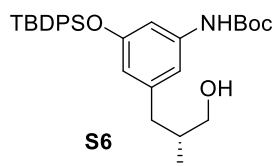

The oxazolidinone **15** (10.2 g, 14.7 mmol, 1.0 eq.) was dissolved in Et<sub>2</sub>O (70 mL) under argon atmosphere, added with water (0.23 mL, 14.7 mmol, 1.0 eq.) and cooled to  $0^{\circ}\text{C}$ . Then lithium borohydride (2 M solution in THF) (16.2 mL, 32.4 mmol, 2.2 eq.) was slowly added and the reaction mixture was stirred for 1.5 h at  $0^{\circ}\text{C}$ . The combined organic extracts were washed with aqueous NaCl solution, dried over MgSO<sub>4</sub> and concentrated under reduced pressure. The crude product was purified by flash chromatography (PE:EtOAc = 10:1  $\rightarrow$  2:1) to give alcohol **S6** (5.95 g, 11.5 mmol, 78%) as a colorless foam;  $R_f$  = 0.4 (PE:EA = 2:1). <sup>1</sup>H-NMR (400 MHz, CDCl<sub>3</sub>, CHCl<sub>3</sub> = 7.26 ppm)  $\delta$  7.71-7.69 (m, 4H, SiPh), 7.43-7.37 (m, 6H, SiPh), 6.80 (bs, 1H, Ph), 6.68 (dd,  $J$  = 2.1, 2.1 Hz, 1H, Ph), 6.25 (bs, 1H, NH), 6.09 (dd,  $J$  = 1.7, 1.7 Hz, 1H, Ph), 3.26 (dd,  $J$  = 10.5, 5.6 Hz, 1H, CH<sub>2</sub>OH), 3.17 (dd,  $J$  = 10.5, 5.9 Hz, 1H, CH<sub>2</sub>OH), 2.39 (dd,  $J$  = 13.3, 6.9 Hz, 1H, ArCH<sub>2</sub>), 2.15 (dd,  $J$  = 13.3, 7.7 Hz, 1H, ArCH<sub>2</sub>), 1.66-1.58 (m, 1H, CHCH<sub>3</sub>), 1.48 (s, 9H, *t*-Bu), 1.25 (bs, CH<sub>2</sub>OH), 1.07 (s, 9H, *t*-SiBu), 0.70 (d,  $J$  = 6.8 Hz, 3H, CHCH<sub>3</sub>) ppm; <sup>13</sup>C-NMR (100 MHz, CDCl<sub>3</sub>, CDCl<sub>3</sub> = 77.16 ppm)  $\delta$  155.8 (s, C-Ar), 152.5 (s, NCOO), 142.3 (s, C-Ar), 139.1 (s, C-Ar), 135.5 (d, C-Ar), 132.9 (s, C-Ar), 129.8 (d, C-Ar), 127.7 (d, C-Ar), 115.3 (d, C-Ar), 111.9 (d, C-Ar), 107.5 (d, C-Ar), 80.3 (s, *t*-Bu), 67.1 (t, CH<sub>2</sub>), 39.4 (t, CH<sub>2</sub>),

37.3 (d, CH), 28.3 (q, *t*-Bu), 26.4 (q, *Sit*-Bu), 19.4 (s, *Sit*-Bu), 16.4 (q, CH<sub>3</sub>) ppm; HRMS (ESI)  $m/z$  for C<sub>31</sub>H<sub>41</sub>NO<sub>4</sub>SiNa [M+Na]<sup>+</sup>: calculated: 542.2703, found: 542.2699; [ $\alpha$ ]<sub>D</sub><sup>20</sup> = +4.9° ( $c$  = 1.0, CHCl<sub>3</sub>).

**(2R)-3-[3-(*tert*-Butoxycarbonylamino)-5-(*tert*-butyldiphenylsiloxy)-phenyl]-2-methyl-propanal (S7)**

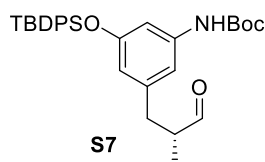

Alcohol **S6** (5.90 g, 11.4 mmol, 1.0 eq.) was dissolved in CH<sub>2</sub>Cl<sub>2</sub> (170 mL), cooled to 0 °C, and NaHCO<sub>3</sub> (1.16 g, 13.6 mmol, 1.2 eq.) was added followed by the Dess-Martin periodinane reagent (5.76 g, 13.6 mmol, 1.2 eq.). After 1 h, the reaction was terminated by the addition of an aqueous Na<sub>2</sub>SO<sub>3</sub>-solution and the aqueous phase was extracted three times with CH<sub>2</sub>Cl<sub>2</sub>. The combined organic phases were washed with brine, dried over MgSO<sub>4</sub>, and concentrated under reduced pressure. Aldehyde **S7** (5.80 g, 11.2 mmol, 99%) was obtained as a colorless foam; R<sub>f</sub> = 0.6 (PE:EA = 2:1). The aldehyde **S7** was directly used in the next reaction.

**Ethyl (4R)-5-[3-(*tert*-Butoxycarbonylamino)-5-(*tert*-butyldiphenylsiloxy)-phenyl]-2-methyl-pent-2-enoate (16)**

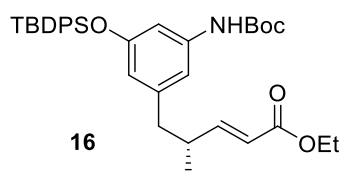

Aldehyde **S7** (5.80 g, 11.2 mmol, 1.0 eq.) was dissolved in CHCl<sub>3</sub> (35 mL) and phosphorylide Ph<sub>3</sub>P=CHCO<sub>2</sub>Et (5.85 g, 16.8 mmol, 1.5 eq.) was added. The reaction mixture was heated to 50 °C and stirred for an additional 15 h at 50 °C. The solvent was removed under reduced pressure, the crude product was purified by flash chromatography (PE:EA = 15:1 → 4:1), and ester **16** (6.40 g, 10.9 mmol, 97%) was obtained as a colorless foam; R<sub>f</sub> = 0.3 (PE:EA = 5:1). <sup>1</sup>H-NMR (400 MHz, CDCl<sub>3</sub>, CHCl<sub>3</sub> = 7.26 ppm) δ 7.72-7.68 (m, 4H, SiPh), 7.44-7.34 (m, 6H, SiPh), 6.81 (dd,  $J$  = 15.7, 7.0 Hz, 1H, 3-H), 6.79 (bs, 1H, NH), 6.64 (s, 1H, Ph), 6.27 (bs, 1H, Ph), 6.09 (s, 1H, Ph), 5.63 (dd,  $J$  = 15.7, 0.6 Hz, 1H, 2-H), 4.16 (q,  $J$  = 7.1 Hz, 2H, OCH<sub>2</sub>), 2.52-2.48 (m, 1H, 5-Ha), 2.27 (dq,  $J$  = 6.8, 6.7 Hz, 1H, 4-H), 2.23-2.17 (m, 1H, 5-Hb), 1.48 (s, 9H, *t*-Bu), 1.27 (t,  $J$  = 7.1 Hz, 3H, OCH<sub>2</sub>CH<sub>3</sub>), 1.07 (s, 9H, *Sit*-Bu), 0.78 (d,  $J$  = 6.7 Hz, 3H, 6-H) ppm; <sup>13</sup>C-NMR (100 MHz, CDCl<sub>3</sub>, CDCl<sub>3</sub> = 77.16 ppm) δ 166.9 (s, COOEt), 156.1 (s, C- Ar), 153.6 (d, C-3), 152.6 (s, NHCOO), 141.5 (s, C-Ar), 139.2 (s, C-Ar), 133.0 (d, C-Ar), 133.0 (s, C-Ar), 130.0 (d, C-Ar), 130.0 (d, C- Ar), 128.7 (d, C-Ar), 119.8 (d, C-2), 115.3 (d, C-Ar), 112.0 (d, C-Ar), 107.9 (d, C-Ar), 80.5 (s, *t*-Bu), 60.2 (t, OCH<sub>2</sub>), 42.2 (t, C-5), 37.9 (d, C-4), 28.4 (q, *t*-Bu), 26.6 (q, *Sit*-Bu), 19.5 (s, *Sit*-Bu), 18.5 (q, C-6), 14.4 (q, OCH<sub>2</sub>CH<sub>3</sub>) ppm; HRMS (ESI)  $m/z$  for C<sub>35</sub>H<sub>45</sub>NO<sub>5</sub>SiNa [M+Na]<sup>+</sup>: calculated: 610.2965, found: 610.2962; [ $\alpha$ ]<sub>D</sub><sup>20</sup> = -19.1° ( $c$  = 1.2, CHCl<sub>3</sub>).

**(4R)-5-[3-(*tert*-Butoxycarbonylamino)-5-(*tert*-butyldiphenylsiloxy)-phenyl]-4-methyl-pent-2-enol (S8)**

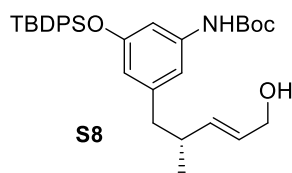

Ester **S7** (6.35 g, 10.8 mmol, 1.0 eq.) was dissolved in CH<sub>2</sub>Cl<sub>2</sub> (100 mL) under argon atmosphere, cooled to -78 °C, and slowly mixed with DIBAL-H (1.2 M solution in toluene) (22.5 mL, 27.0 mmol, 2.5 eq.). The reaction mixture was stirred at -78 °C for 5 h and then warmed to room temperature. The reaction was terminated by addition of an aqueous Na-K tartrate solution and the reaction mixture was stirred overnight at room temperature. The aqueous phase was extracted three times with CH<sub>2</sub>Cl<sub>2</sub>. The combined organic extracts were washed with brine, dried over MgSO<sub>4</sub> and concentrated under reduced pressure. The crude product was purified by flash chromatography (PE:EA = 10:1 → 2:1) to give alcohol **S8** (4.50 g, 8.25 mmol, 76%) as a colorless foam; R<sub>f</sub> = 0.4 (PE:EA = 2:1). <sup>1</sup>H-NMR (400 MHz, CDCl<sub>3</sub>, CHCl<sub>3</sub> = 7.26 ppm) δ 7.71-7.69 (m, 4H, SiPh), 7.43-7.33 (m, 6H, SiPh), 6.91 (s, 1H, Ph), 6.46 (m, 1H, Ph), 6.23 (bs, 1H, NH), 6.14 (m, 1H, Ph), 5.50 (dd,  $J$  = 15.5, 7.0 Hz, 1H, 3-H), 5.39 (dt,  $J$  = 15.5, 5.5 Hz, 1H, 2-H), 3.99 (t,  $J$  = 5.5 Hz, 2H, 1-H), 2.39 (dd,  $J$  = 13.1, 7.3 Hz, 1H,

5-Ha), 2.28 (dd,  $J = 13.1, 6.7$  Hz, 1H, 5-Hb), 2.16 (m, 1H, 4-H), 1.73 (bs, 1H, CH<sub>2</sub>OH), 1.47 (s, 9H, *t*-Bu), 1.09 (s, 9H, *Sit*-Bu), 0.80 (d,  $J = 6.8$  Hz, 3H, 5-Me) ppm; <sup>13</sup>C-NMR (100 MHz, CDCl<sub>3</sub>, CDCl<sub>3</sub> = 77.16 ppm)  $\delta$  155.8 (s, C-Ar), 152.9 (s, NHCOO), 142.4 (s, C-Ar), 138.7 (s, C-Ar), 138.0 (d, C-3), 135.6 (d, C-Ar), 133.0 (s, C-Ar), 130.0 (d, C-Ar), 127.8 (d, C-2), 115.7 (d, C-Ar), 112.9 (d, C-Ar), 107.7 (d, C-Ar), 80.6 (s, *t*-Bu), 63.9 (t, C-1), 43.4 (t, C-5), 37.8 (d, C-4), 28.5 (q, *t*-Bu), 26.6 (q, *Sit*-Bu), 19.7 (q, 5-Me), 19.6 (s, *Sit*-Bu) ppm; HRMS (ESI)  $m/z$  for C<sub>33</sub>H<sub>44</sub>NO<sub>4</sub>Si [M+H]<sup>+</sup>: calculated: 546.3040, found: 546.3031;  $[\alpha]_D^{20} = -10.7^\circ$  ( $c = 1.0$ , CHCl<sub>3</sub>).

***tert*-Butyl {3-[(*tert*-butyldiphenylsilyl)oxy]-5-[(*R*)-2-[(2*R*,3*R*)-3-(hydroxymethyl)oxiran-2-yl]propyl]phenyl}carbamate (**17**)**

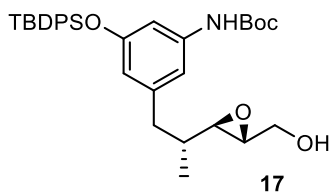

Freshly activated molecular sieves (4 Å) were suspended in CH<sub>2</sub>Cl<sub>2</sub> (40 mL) and D-(-)-DET (0.82 mL, 4.76 mmol, 1.3 eq.) was added. The reaction was cooled to -20 °C and Ti(O*i*Pr)<sub>4</sub> (1.29 mL, 4.39 mmol, 1.2 eq) and *t*-BuOOH (5.0 – 6.0 M in decane, 2.93 mL, 14.65 – 17.58 mmol, 4.0 eq.) were added subsequently. Stirring was continued at this temperature for 1 h. Allylic alcohol **S8** (2.00 g, 3.66 mmol, 1.0 eq.) as a solution in CH<sub>2</sub>Cl<sub>2</sub> (10 mL) was slowly added to the reaction mixture and stirring was continued at -20 °C for 42 h. The reaction was terminated by addition of a EDTE (1.09 g, 4.61 mmol, 1.26 eq.; EDTE= *N,N,N',N'*-tetrakis(2-hydroxyethyl)ethylenediamine; 1.05 eq. relative to the amount of Ti(O*i*Pr)<sub>4</sub>). The mixture was heated to 55 °C for 15 min and after cooling to room temperature, the mixture was diluted with aqueous NH<sub>4</sub>OH and CH<sub>2</sub>Cl<sub>2</sub>. The two clear phases were separated and the aqueous layer was extracted with CH<sub>2</sub>Cl<sub>2</sub> (3 x 20 mL). The combined organic layers were dried over MgSO<sub>4</sub>, filtered and the solvent was removed under reduced pressure. The crude product was purified by flash column chromatography (PE/EtOAc = 10:1 → 2:1) to yield epoxide **17** (1.96 g, 3.48 mmol, 96%, d.r. > 10:1) as a colourless foam.  $R_f = 0.3$  (PE/EtOAc = 4:1); <sup>1</sup>H-NMR (400 MHz, CDCl<sub>3</sub>, CHCl<sub>3</sub> = 7.26 ppm):  $\delta$  7.71 – 7.69 (m, 4H, TBDPS), 7.43 – 7.34 (m, 6H, TBDPS), 6.85 (bs, 1H, HAr), 6.63 – 6.62 (m, 1H, HAr), 6.29 (bs, 1H, NH), 6.12 – 6.11 (m, 1H, HAr), 3.81 (dd,  $J = 12.6, 2.7$  Hz, 1H, H-11), 3.56 (dd,  $J = 12.6, 4.2$  Hz, 1H, H-11'), 2.86 – 2.84 (m, 1H, H-12), 2.70 (dd,  $J = 6.8, 2.3$  Hz, 1H, H-13), 2.62 (dd,  $J = 13.4, 5.3$  Hz, 1H, H-15), 2.22 (dd,  $J = 13.3, 8.9$  Hz, 1H, H-15'), 1.53 – 1.15 (m, 1H, H-14), 1.48, (s, 9H, Boc), 1.08 (s, 9H, TBDPS), 0.59 (d,  $J = 6.8$  Hz, 3H, Me-14) ppm; <sup>13</sup>C-NMR (400 MHz, CDCl<sub>3</sub>, CDCl<sub>3</sub> = 77.16 ppm):  $\delta$  156.0 (s, CAr), 152.7 (s, Boc), 141.4 (s, CAr), 139.1 (s, CAr), 135.6 (d, CAr), 135.6 (d, CAr), 133.0 (s, CAr), 133.0 (s, CAr), 130.0 (d, CAr), 130.0 (d, CAr), 127.9 (d, CAr), 127.9 (d, CAr), 115.6 (d, CAr), 112.4 (d, CAr), 107.9 (d, CAr), 80.6 (s, Boc), 61.9 (t, C-11), 59.9 (d, C-13), 57.2 (d, C-12), 40.1 (t, C-15), 36.4 (d, C-14), 28.5 (q, Boc), 26.6 (q, TBDPS), 19.6 (s, TBDPS), 14.8 (q, Me-14) ppm;  $[\alpha]_D^{20} = +5.6$  ( $c = 1.2$ , CH<sub>2</sub>Cl<sub>2</sub>; HRMS-ESI  $m/z$  for C<sub>33</sub>H<sub>43</sub>NO<sub>5</sub>SiNa [M+Na]<sup>+</sup> + calc. 584.2808, found: 584.2807.

**(4*R*, 2*S*)-5-[3-(*tert*-Butoxycarbonylamino)-5-(*tert*-butyldiphenylsiloxy)-phenyl]-4-methyl-1,2-pentanediol (**S9**)**

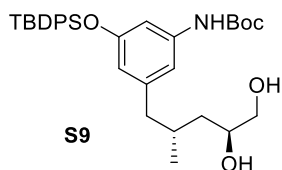

Epoxide **17** (7.16 g, 12.8 mmol, 1.0 eq.) was dissolved in Et<sub>2</sub>O (450 mL) under argon atmosphere, cooled to 0 °C and mixed with DIBAL-H (1.2 M solution in toluene) (53.1 mL, 63.7 mmol, 5.0 eq.). The reaction mixture was warmed to room temperature and stirred for an additional 5 h at room temperature. Na-K-tartrate solution was added and the reaction mixture was stirred overnight at room temperature. The aqueous phase was extracted three times with ethylacetate. The combined organic extracts were washed with brine, dried over MgSO<sub>4</sub> and concentrated under reduced pressure. The crude product was purified by flash chromatography (PE:EtOAc = 1:1 → 1:4) to give diol **S9** (6.09 g, 10.8 mmol, 85%) as a colorless foam;  $R_f = 0.5$  (PE:EA

= 1:4). <sup>1</sup>H-NMR (400 MHz, CDCl<sub>3</sub>, CHCl<sub>3</sub> = 7.26 ppm) δ 7.71-7.69 (m, 4H, SiPh), 7.41-7.34 (m, 6H, SiPh), 6.80 (s, 1H, Ph), 6.63 (m, 1H, Ph), 6.26 (bs, 1H, NH), 6.11 (m, 1H, Ph), 3.72-3.65 (m, 1H, 2-H), 3.52 (ddd, *J* = 10.8, 5.8, 3.3 Hz, 1H, 1-Ha), 3.30 (ddd, *J* = 10.8, 7.3, 4.0 Hz, 1H, 1-Hb), 2.31 (dd, *J* = 13.3, 6.6 Hz, 1H, 5-Ha), 2.19 (dd, *J* = 13.3, 7.8 Hz, 1H, 5-Hb), 1.86 (dd, *J* = 5.8, 4.0 Hz, 1H, 1-OH), 1.77 (d, *J* = 4.4 Hz, 1H, 2-OH), 1.73-1.64 (m, 1H, 4-H), 1.47 (s, 9H, *t*-Bu), 1.31 (ddd, *J* = 13.8, 9.3, 4.6 Hz, 1H, 3-Ha), 1.07 (s, 9H, *Sit*-Bu), 0.97 (ddd, *J* = 13.8, 9.7, 3.9 Hz, 1H, 3-Hb), 0.69 (d, *J* = 6.4 Hz, 3H, 5-Me) ppm; <sup>13</sup>C-NMR (100 MHz, CDCl<sub>3</sub>, CDCl<sub>3</sub> = 77.16 ppm) δ 155.9 (s, C-Ar), 152.7 (s, NHCOO), 142.6 (s, C-Ar), 139.0 (s, C-Ar), 135.6 (d, C-Ar), 133.0 (s, C-Ar), 129.9 (d, C-Ar), 127.8 (d, C-Ar), 115.5 (d, C-Ar), 112.3 (d, C-Ar), 107.9 (d, C-Ar), 80.5 (s, *t*-Bu), 70.1 (d, C-2), 67.5 (t, C-1), 44.0 (t, C-5), 39.7 (t, C-3), 30.8 (d, C-4), 28.4 (q, *t*-Bu), 26.6 (q, *Sit*-Bu), 19.5 (s, *Sit*-Bu), 14.7 (q, 5-Me) ppm; HRMS (ESI) *m/z* for C<sub>33</sub>H<sub>45</sub>NO<sub>5</sub>SiNa [M+Na]<sup>+</sup>: calculated: 586.2965, found: 586.2964; [α]<sub>D</sub><sup>20</sup> = -10.1° (*c* = 1.0, CHCl<sub>3</sub>).

***tert*-Butyl {3-[(2*R*,4*S*)-5-[(*tert*-butyldimethylsilyl)oxy]-4-hydroxy-2-methylpentyl]-5-[(*tert*-butyldiphenylsilyl)oxy]phenyl}carbamate (**S10**)**

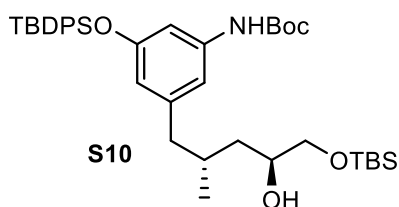

Diol **S9** (1.81 g, 3.20 mmol, 1.0 eq.) was dissolved in CH<sub>2</sub>Cl<sub>2</sub> (100 mL) and cooled to 0 °C. 2,6-Lutidine (372 μL, 3.20 mmol, 1.0 eq.) was added followed by dropwise addition of TBSOTf (736 μL, 3.20 mmol, 1.0 eq.). The reaction was stirred at 0 °C for 30 min and was terminated by the addition of a saturated aqueous NH<sub>4</sub>Cl solution. The phases were separated and the aqueous phase was extracted with CH<sub>2</sub>Cl<sub>2</sub> (4 x 20 mL). The combined organic phases were washed with brine, dried over MgSO<sub>4</sub>, filtered and the solvent was removed under reduced pressure. The crude product was purified by flash column chromatography (PE/EtOAc = 20:1) to yield silyl ether **S10** (1.67 g, 2.46 mmol, 77%, 92% brsm) as a colorless oil. *R<sub>f</sub>* = 0.5 (PE/EtOAc = 4:1); <sup>1</sup>H-NMR (400 MHz, CDCl<sub>3</sub>, CHCl<sub>3</sub> = 7.26 ppm): δ 7.72 – 7.70 (m, 4H, TBDPS), 7.43 – 7.34 (m, 6H, TBDPS), 6.78 (bs, 1H, H<sub>Ar</sub>), 6.66 (s, 1H, H<sub>Ar</sub>), 6.26 (bs, 1H, NH), 6.15 (s, 1H, H<sub>Ar</sub>), 3.70 – 3.64 (m 1H, H-12), 3.52 (dd, *J* = 9.9, 3.4 Hz, 1H, H-11), 3.31 (dd, *J* = 9.8, 7.6 Hz, H-11'), 2.40 (dd, *J* = 13.3, 6.0 Hz, 1H, H-15), 2.13 (dd, *J* = 13.3, 8.4 Hz, 1H, H-15'), 1.82 – 1.73 (m, 1H, H-14), 1.48 (s, 9H, Boc), 1.37 – 1.31 (m, 1H, H-13), 1.08 (s, 9H, TBDPS), 0.99 – 0.92 (m, 1H, H-13'), 0.90 (s, 9H, TBDPS), 0.67 (d, *J* = 6.6 Hz, 3H, Me-14), 0.07 (s, 6H, TBDPS) ppm; <sup>13</sup>C-NMR (400 MHz, CDCl<sub>3</sub>, CDCl<sub>3</sub> = 77.16 ppm): δ 155.9 (s, C<sub>Ar</sub>), 152.6 (s, Boc), 142.9 (s, C<sub>Ar</sub>), 139.0 (s, C<sub>Ar</sub>), 135.7 (d, 4C, TBDPS), 133.1 (s, 2C, TBDPS), 129.9 (d, 2C, TBDPS), 127.9 (d, 4C, TBDPS), 115.6 (d, C<sub>Ar</sub>), 112.3 (d, C<sub>Ar</sub>), 107.6 (d, C<sub>Ar</sub>), 80.4 (s, Boc), 69.7 (d, C-12), 68.0 (t, C-11), 44.3 (t, C-15), 39.6 (t, C-13), 31.0 (d, C-14), 28.5 (q, 3C, Boc), 26.6 (q, 3C, TBDPS), 26.0 (q, 3C, TBS), 19.6 (s, TBDPS), 19.0 (q, Me-14), 18.4 (s, TBS), -5.2 (q, 2C, TBS) ppm; [α]<sub>D</sub><sup>20</sup> = -2.0 (*c* = 1.4, CH<sub>2</sub>Cl<sub>2</sub>; HRMS-ESI *m/z* for C<sub>39</sub>H<sub>59</sub>NO<sub>5</sub>Si<sub>2</sub>Na [M+Na]<sup>+</sup> calc. 700.3830, found 700.3834.

**(4*R*, 2*S*)-5-[3-(*tert*-Butoxycarbonylamino)-5-(*tert*-butyldiphenylsiloxy)-phenyl]-4-methyl-1-(*tert*-butyldemethylsiloxy)-2-methoxypentane (**S11**)**

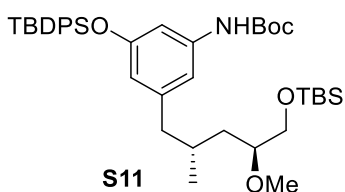

Alcohol **S10** (4.40 g, 6.49 mmol, 1.0 eq.) was dissolved in CH<sub>2</sub>Cl<sub>2</sub> (120 mL) under argon atmosphere and 1,8-bis(dimethylamino)-naphthalene (4.87 g, 22.7 mmol, 3.5 eq.) and Me<sub>3</sub>OPF<sub>4</sub> (3.08 g, 16.2 mmol, 2.5 eq.) were added. After 1 h, the reaction was terminated by addition of water. The phases were separated and the aqueous phase was extracted three times with CH<sub>2</sub>Cl<sub>2</sub>. The combined organic extracts were washed with brine, dried over MgSO<sub>4</sub> and concentrated under reduced pressure. The crude product was purified by flash chromatography (PE:EA = 15:1 → 4:1) to give the methylated alcohol **S11** (3.98 g, 5.76 mmol,



89%) as a colorless foam;  $R_f = 0.5$  (PE:EtOAc = 4:1).  $^1\text{H-NMR}$  (400 MHz,  $\text{CDCl}_3$ ,  $\text{CHCl}_3 = 7.26$  ppm)  $\delta$  7.72-7.69 (m, 4H, SiPh), 7.43-7.33 (m, 6H, SiPh), 6.75 (s, 1H, Ph), 6.67 (m, 1H, Ph), 6.24 (bs, 1H, NH), 6.15 (m, 1H, Ph), 3.58 (dd,  $J = 10.5, 5.8$  Hz, 1H, 1-Ha), 3.46 (dd,  $J = 10.5, 4.6$  Hz, 1H, 1-Hb), 3.36 (s, 3H, OMe), 3.25-3.19 (m, 1H, 2-H), 2.42 (dd,  $J = 13.2, 5.5$  Hz, 1H, 5-Ha), 2.06 (dd,  $J = 13.2, 9.0$  Hz, 1H, 5-Hb), 1.75-1.66 (m, 1H, 4-H), 1.48 (s, 9H, *t*-Bu), 1.38-1.31 (m, 1H, 3-Ha), 1.08 (s, 9H, *Sit*-Bu), 0.98-0.93 (m, 1H, 3-Hb), 0.89 (s, 9H, *Sit*-Bu), 0.62 (d,  $J = 6.5$  Hz, 3H, 5-Me), 0.05 (s, 6H, SiMe) ppm;  $^{13}\text{C-NMR}$  (100 MHz,  $\text{CDCl}_3$ ,  $\text{CDCl}_3 = 77.16$  ppm)  $\delta$  155.9 (s, C-Ar), 152.6 (s, NHCOO), 143.1 (s, C-Ar), 139.0 (s, C-Ar), 135.7 (d, C-Ar), 133.1 (s, C-Ar), 129.9 (d, C-Ar), 127.8 (d, C-Ar), 115.6 (d, C-Ar), 112.3 (d, C-Ar), 107.6 (d, C-Ar), 80.4 (s, *t*-Bu), 80.0 (d, C-2), 66.1 (t, C-1), 58.2 (q, OMe), 44.4 (t, C-5), 39.2 (t, C-3), 31.2 (d, C-4), 28.5 (q, *t*-Bu), 26.6 (q, *Sit*-Bu), 26.1 (q, *Sit*-Bu), 19.6 (s, *Sit*-Bu), 19.0 (q, 5-Me), 18.4 (s, *Sit*-Bu), -5.2 (q, SiMe) ppm;  $[\alpha]_D^{20} = -7.4^\circ$  ( $c = 1.0$ ,  $\text{CHCl}_3$ ).

**(4*R*, 2*S*)-5-[3-(*tert*-Butoxycarbonylamino)-5-(*tert*-butyldiphenylsiloxy)-phenyl]-4-methyl-2-methoxypentane (**18**)**

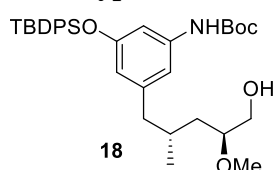

Alcohol **S11** (3.98 g, 5.76 mmol, 1.0 eq.) was dissolved in  $\text{CH}_2\text{Cl}_2$  (40 mL) under argon atmosphere and acetonitrile (40 mL) and  $\text{LiBF}_4$  (1.62 g, 17.3 mmol, 3.0 eq.) were added. After 48 h, the reaction was terminated by addition of water. The phases were separated and the aqueous phase was extracted three times with  $\text{CH}_2\text{Cl}_2$ . The combined organic extracts were washed with brine, dried over  $\text{MgSO}_4$  and concentrated under reduced pressure. The crude product was purified by flash chromatography (PE:EA = 10:1  $\rightarrow$  2:1) followed by preparative HPLC (C18-P) ( $\text{H}_2\text{O}:\text{MeOH} = 80:20$  {5 min}, gradient  $\text{H}_2\text{O}:\text{MeOH} = 80:20 \rightarrow 0:100$  {85 min},  $\text{H}_2\text{O}:\text{MeOH} = 0:100$  {10 min}, 15 mL/min) ( $t_R = 85.0$  min) was purified and the methylated alcohol **18** (2.50 g, 4.32 mmol, 75%) was obtained as a colorless foam;  $R_f = 0.3$  (PE:EA = 2:1).

$^1\text{H-NMR}$  (400 MHz,  $\text{CDCl}_3$ ,  $\text{CHCl}_3 = 7.26$  ppm)  $\delta$  7.71-7.69 (m, 4H, SiPh), 7.41-7.34 (m, 6H, SiPh), 6.77 (s, 1H, Ph), 6.66 (m, 1H, Ph), 6.26 (bs, 1H, NH), 6.11 (m, 1H, Ph), 3.61-3.58 (m, 1H, 1-Ha), 3.40-3.35 (m, 1H, 1-Hb), 3.30 (s, 3H, OMe), 3.28-3.22 (m, 1H, 2-H), 2.38 (dd,  $J = 13.2, 5.8$  Hz, 1H, 5-Ha), 2.07 (dd,  $J = 13.2, 8.7$  Hz, 1H, 5-Hb), 1.85 (br. s, 1H, 1-OH), 1.66-1.59 (m, 1H, 4-H), 1.48 (s, 9H, *t*-Bu), 1.50-1.46 (m, 1H, 3-Ha), 1.07 (s, 9H, *Sit*-Bu), 1.10-1.05 (m, 1H, 3-Hb), 0.69 (d,  $J = 6.8$  Hz, 3H, 5-Me) ppm;  $^{13}\text{C-NMR}$  (100 MHz,  $\text{CDCl}_3$ ,  $\text{CDCl}_3 = 77.16$  ppm)  $\delta$  155.9 (s, C-Ar), 152.7 (s, NHCOO), 142.6 (s, C-Ar), 139.0 (s, C-Ar), 135.6 (d, C-Ar), 133.0 (s, C-Ar), 129.9 (d, C-Ar), 127.8 (d, C-Ar), 115.5 (d, C-Ar), 112.3 (d, C-Ar), 107.9 (d, C-Ar), 80.5 (s, *t*-Bu), 79.6 (d, C-2), 64.3 (t, C-1), 57.0 (q, OMe), 44.0 (t, C-5), 37.9 (t, C-3), 31.4 (d, C-4), 28.4 (q, *t*-Bu), 26.6 (q, *Sit*-Bu), 19.5 (s, *Sit*-Bu), 19.5 (q, 5-Me) ppm; HRMS (ESI)  $m/z$  for  $\text{C}_{37}\text{H}_{48}\text{NO}_5\text{Si}$   $[\text{M}+\text{H}]^+$ : calculated: 578.3454, found: 578.3467;  $[\alpha]_D^{20} = +6.1^\circ$  ( $c = 1.0$ ,  $\text{CH}_2\text{Cl}_2$ ).

**(4*R*, 2*S*)-5-[3-(*tert*-Butoxycarbonylamino)-5-(*tert*-butyldiphenylsiloxy)-phenyl]-4-methyl-2-methoxy-1-pentanal (**S12**)**

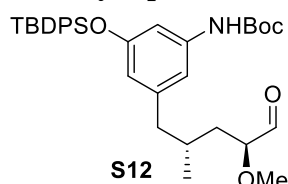

Alcohol **18** (0.15 g, 0.25 mmol, 1.0 eq.) was dissolved in  $\text{CH}_2\text{Cl}_2$  (20 mL), cooled to  $0^\circ\text{C}$ , and  $\text{NaHCO}_3$  (0.03 g, 0.30 mmol, 1.2 eq.) and the Dess-Martin periodinane reagent (0.13 g, 0.30 mmol, 1.2 eq.) were added. After 1 h at room temperature, the reaction was terminated by addition of an aqueous  $\text{Na}_2\text{SO}_3$  solution. The phases were separated and the aqueous phase was extracted three times with  $\text{CH}_2\text{Cl}_2$ . The combined organic phases were washed with aqueous NaCl solution, dried over  $\text{MgSO}_4$ , concentrated under reduced pressure, and aldehyde **S12** (0.15 g, 0.25 mmol, 99%) was obtained as a colorless foam;  $R_f = 0.8$  (PE:EA = 2:1). The aldehyde **S12** was directly reused without characterization.



**(3*S*, 4*R*, 5*S*, 7*R*)-8-[3-*tert*-Butoxycarbonylamino-5-(*tert*-butyldiphenylsiloxy)-phenyl]-4-hydroxy-5-methoxy-3,7-dimethyl-oct-2-ene (19)**

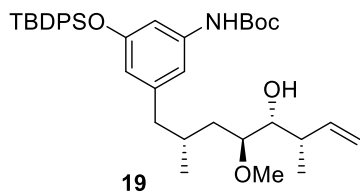

Z-Crotylboronate **21** (0.18 g, 0.61 mmol, 2.5 eq.) was dissolved in toluene (2.0 mL) under argon atmosphere. Molecular sieves 4Å (0.10 g) was then added, the reaction mixture was stirred at room temperature for 20 min, and then cooled to -78 °C. Aldehyde **S12** (0.14 g, 0.24 mmol, 1.0 eq.) was dissolved in toluene (1.0 mL) and slowly added to the reaction mixture. After 20 h, the reaction was terminated by addition of an aqueous NaOH solution (1.0 M). The reaction mixture was heated to room temperature and stirred for 1 h at this temperature. The molecular sieves were filtered off over Celite™ and the aqueous phase was extracted three times with Et<sub>2</sub>O. The combined organic extracts were washed with brine, dried over MgSO<sub>4</sub> and concentrated under reduced pressure. The crude product was purified by flash chromatography (PE:EA= 10:1 → 4:1) to afford alkene **19** (0.15 g, 0.24 mmol, 97%) as a colorless foam; *R*<sub>f</sub> = 0.4 (PE:EA= 5:1). <sup>1</sup>H-NMR (400 MHz, CDCl<sub>3</sub>, CHCl<sub>3</sub> = 7.26 ppm) δ 7.72-7.69 (m, 4H, SiPh), 7.42-7.34 (m, 6H, SiPh), 6.77 (s, 1H, Ph), 6.66 (m, 1H, Ph), 6.28 (bs, 1H, NH), 6.16 (m, 1H, Ph), 5.61 (ddd, *J* = 17.2, 10.2, 8.6 Hz, 1H, 2-H), 5.03 (d, *J* = 10.2 Hz, 1-Ha), 4.99 (d, *J* = 3.1 Hz, 1H, 1-Hb), 3.58 (d, *J* = 8.9 Hz, 1H, 4-H), 3.29 (s, 3H, OMe), 3.21-3.19 (m, 1H, 5-H), 2.42 (dd, *J* = 13.3, 5.5 Hz, 1H, 8-Ha), 2.26-2.16 (m, 1H, 3-H), 2.09 (br. s, 1H, 4-OH), 2.09-2.03 (m, 1H, 8-Hb), 1.76-1.63 (m, 1H, 7-H), 1.57-1.51 (m, 1H, 6-Ha), 1.48 (s, 9H, *t*-Bu), 1.13 (d, *J* = 6.5 Hz, 3H, 3-Me), 1.08 (s, 9H, *Sit*-Bu), 1.07-1.02 (m, 1H, 6-Hb), 0.58 (d, *J* = 6.5 Hz, 3H, 7-Me) ppm; <sup>13</sup>C-NMR (100 MHz, CDCl<sub>3</sub>, CDCl<sub>3</sub> = 77.16 ppm) δ 155.9 (s, C-Ar), 152.7 (s, NHCOO), 143.1 (s, C-Ar), 140.1 (d, C-2), 139.0 (s, C-Ar), 135.6 (d, C-Ar), 133.1 (s, C-Ar), 129.9 (d, C-Ar), 115.6 (t, C-1), 115.3 (d, C-Ar), 112.3 (d, C-Ar), 107.6 (d, C-Ar), 80.5 (s, *t*-Bu), 80.2 (d, C-5), 73.5 (d, C-4), 57.1 (q, OMe), 44.7 (t, C-8), 40.5 (d, C-3), 34.7 (t, C-6), 30.9 (d, C-7), 28.5 (q, *t*-Bu), 26.6 (q, *Sit*-Bu), 19.6 (s, *Sit*-Bu), 18.5 (q, 7-Me), 17.5 (q, 3-Me) ppm; HRMS (ESI) *m/z* for C<sub>38</sub>H<sub>53</sub>NO<sub>5</sub>SiNa [M+Na]<sup>+</sup>: calculated: 654.3591, found: 654.3577; [α]<sub>D</sub><sup>20</sup> = -17.8° (*c* = 1.0, CHCl<sub>3</sub>).

### 3.3.2 Synthesis of eastern fragment 24

#### (*S*)-5-Oxotetrahydrofuran-2-carboxylic acid (**22**) (ref. S9)

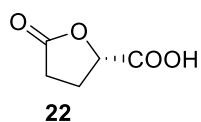

L-glutamic acid (19.0 g, 129 mmol, 1.0 eq.) was dissolved in water (140 mL), hydrochloric acid (2 M, 85 mL) was added, and the reaction mixture was cooled to -10 °C. NaNO<sub>2</sub> (10.7 g, 155 mmol, 1.2 eq.) was dissolved in water (85 mL) and slowly added to the reaction mixture within 3 h. The reaction mixture was cooled to room temperature and stirred for 12 h. The aqueous phase was extracted three times with ethyl acetate. The combined organic extracts were dried over MgSO<sub>4</sub> and concentrated under reduced pressure. The acid **22** (8.57 g, 65.9 mmol, 66%) was obtained as a colorless solid. <sup>1</sup>H-NMR (400 MHz, MeOD-*d*<sub>4</sub>, MeOH = 3.31 ppm): δ 5.00 (dd, *J* = 7.8, 4.9 Hz, 1H, H-4), 2.70-2.55 (m, 2H, H-2), 2.55-2.40 (m, 1H, H-3a), 2.38-2.25 (m, 1H, H-3b) ppm; HRMS (ESI) *m/z* for C<sub>5</sub>H<sub>5</sub>O<sub>4</sub> [M-H]<sup>-</sup>: calculated: 129.0188, found: 129.0190; mp= 69 °C; [α]<sub>D</sub><sup>20</sup> = +14.5° (*c* = 1.0, MeOH); ref. S10: [α]<sub>D</sub><sup>20</sup> = +15.6° (*c* = 2.0, EtOH).

#### (*S*)-5-(Hydroxymethyl)-2-oxotetrahydrofuran (**S13**)

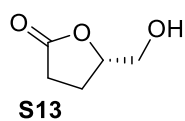

Acid **22** (7.50 g, 57.7 mmol, 1.0 eq.) was dissolved in THF (200 mL) under argon atmosphere. The solution was cooled to 0 °C and BH<sub>3</sub>\*SMe<sub>2</sub> (8.20 mL, 86.5 mmol, 1.5 eq.) were added. The reaction mixture was warmed to room temperature stirred for 3 h. The reaction was terminated by addition of MeOH and the solvent was removed under reduced pressure to give lactone **S13** (6.5 g, 56.0 mmol, 97%) as a colorless oil. <sup>1</sup>H-NMR (400 MHz, MeOD-*d*<sub>4</sub>, MeOH = 3.31 ppm): δ 4.72-4.56 (m, 1H, 4-H), 3.91 (dd, *J* = 1.9, 3.4 Hz,

1H, 5-Ha), 3.66 (dd,  $J = 11.9, 4.4$  Hz, 1H, 5-Hb), 2.68-2.53 (m, 2H, 2-H), 2.35-2.05 (m, 2H, 3-H) ppm;  $[\alpha]_{\text{D}}^{20} = +44.6^\circ$  ( $c = 1.0$ ,  $\text{CHCl}_3$ ); ref. [S9]:  $[\alpha]_{\text{D}}^{20} = +31.3^\circ$  ( $c = 2.92$ , EtOH).

**(S)-5-[(4-Methoxybenzyl)oxymethyl]-2-oxotetrahydrofuran (S14)**

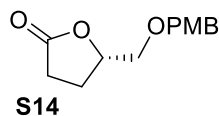

Alcohol **S13** (1.66 g, 14.28 mmol, 1.0 eq.) was dissolved in  $\text{CH}_2\text{Cl}_2$  (50 mL) at room temperature. 4-Methoxybenzyl-2,2,2-trichloroacetimidate (6.05 g, 21.42 mmol, 1.5 eq.) was added, followed by CSA (165.8 mg, 0.71 mmol, 5 mol%). Stirring was continued for 3 days before the reaction was terminated by the addition of a saturated aqueous  $\text{NaHCO}_3$  solution. The phases were separated and the aqueous phase was extracted with  $\text{CH}_2\text{Cl}_2$  (3 x 30 mL). The combined organic phases were dried over  $\text{MgSO}_4$ , filtered and the solvent was removed under reduced pressure. The crude product was purified by flash column chromatography (PE/EtOAc = 6:1  $\rightarrow$  1:1) to furnish protected alcohol **S14** (3.09 g, 13.07 mmol, 92%) as an orange oil.

$R_f = 0.2$  (PE/EtOAc = 2:1);  $^1\text{H-NMR}$  (400 MHz,  $\text{CDCl}_3$ ,  $\text{CHCl}_3 = 7.26$  ppm):  $\delta$  7.24 (d,  $J = 8.8$  Hz, 2H, PMB), 6.88 (app. d,  $J = 8.7$  Hz, 2H, PMB), 4.68 – 4.62 (m, 1H, H-6), 4.49 (dd,  $J = 26.6, 3.4$  Hz, 2H, PMB), 3.80 (s, 3H, PMB), 3.64 (dd,  $J = 10.7, 3.5$  Hz, 1H, H-7), 3.55 (dd,  $J = 10.7, 4.2$  Hz, 1H, H-7'), 2.61 (ddd,  $J = 17.7, 10.0, 6.6$  Hz, 1H, H-4), 2.47 (ddd,  $J = 17.7, 9.9, 7.0$  Hz, 1H, H-4'), 2.27 (dddd,  $J = 12.8, 9.9, 7.8, 6.6$  Hz, 1H, H-5), 2.11 (dddd,  $J = 12.8, 10.0, 7.0, 5.9$  Hz, 1H, H-5') ppm;  $[\alpha]_{\text{D}}^{20} = +6.9$  ( $c = 1.1$ ,  $\text{CH}_2\text{Cl}_2$ ; ref. [S10]  $[\alpha]_{\text{D}}^{20} = +10.6$ ,  $c = 1.0$ ,  $\text{CHCl}_3$ ; HRMS-ESI  $m/z$  for  $\text{C}_{13}\text{H}_{16}\text{O}_4\text{Na}$   $[\text{M}+\text{Na}]^+$  calc. 259.0947, found 259.0944.

**(S)-5-[(4-Methoxybenzyl)oxy]pentane-1,4-diol (S15)**

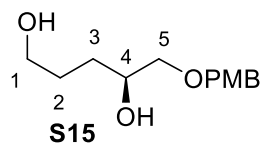

PMB-ether **S14** (1.72 g, 7.28 mmol, 1.0 eq.) as a solution in THF (20 mL) was slowly added to a suspension of lithium aluminium hydride (0.69 g, 18.21 mmol, 2.5 eq.) in THF (80 mL) at  $-10^\circ\text{C}$ . Stirring was continued for 2 h before the reaction was terminated by careful addition of MeOH (20 mL). A saturated aqueous Rochelle's salt solution and  $\text{Et}_2\text{O}$  was added and the mixture was allowed to reach room temperature and stirred vigorously for 5 h. The phases were separated and the aqueous phase was extracted with  $\text{Et}_2\text{O}$  (3 x 40 mL). The combined organic phases were washed with brine, dried over  $\text{MgSO}_4$ , filtered and the solvent was removed under reduced pressure. The corresponding diol **S15** (1.59 g, 6.63 mmol, 91%) was obtained as a colorless oil and was of sufficient purity to be used without further purification.  $R_f = 0.3$  (100% EtOAc);  $^1\text{H-NMR}$  (400 MHz,  $\text{CDCl}_3$ ,  $\text{CHCl}_3 = 7.26$  ppm):  $\delta$  7.25 (app. d,  $J = 8.7$  Hz, 2H, PMB), 6.88 (d,  $J = 8.7$  Hz, 2H, PMB), 4.48 (s, 2H, PMB), 3.86 – 3.82 (m, 1H, H-6), 3.81 (s, 3H, PMB), 3.66 (ddd,  $J = 23.1, 10.8, 5.9$  Hz, 2H, H-3), 3.47 (dd,  $J = 9.4, 3.3$  Hz, 1H, H-7), 3.32 (dd,  $J = 9.4, 8.0$  Hz, 1H, H-7'), 2.79 (bs, 1H, OH), 2.36 (bs, 1H, OH), 1.72 – 1.66 (m, 2H, H-4), 1.63 – 1.55 (m, 1H, H-5), 1.54 – 1.44 (m, 1H, H-5') ppm;  $[\alpha]_{\text{D}}^{23} = -7.42$  ( $c = 1.0$ , EtOH; HRMS-ESI  $m/z$  for  $\text{C}_{13}\text{H}_{20}\text{O}_4\text{Na}$   $[\text{M}+\text{Na}]^+$  calc. 263.1260, found 263.1258.

**(S)-5-(tert-Butyldimethylsilyloxy)-1-[(4-methoxybenzyl)oxy]pentane-2-ol (S16)**

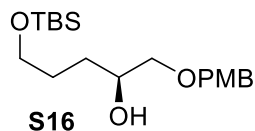

Diol **S15** (0.85 g, 3.54 mmol, 1.0 eq.) was dissolved in  $\text{CH}_2\text{Cl}_2$  (25 mL) under argon atmosphere, cooled to  $0^\circ\text{C}$ , and mixed with imidazole (0.48 g, 7.08 mmol, 2.0 eq.) followed by TBSCl (0.59 g, 3.90 mmol, 1.1 eq.). The reaction mixture was heated to room temperature and stirred for 1 h. The reaction was terminated by addition of an aqueous  $\text{NH}_4\text{Cl}$  solution. The phases were separated and the aqueous phase was

extracted three times with  $\text{CH}_2\text{Cl}_2$ . The combined organic extracts were washed with brine, dried over  $\text{MgSO}_4$  and concentrated under reduced pressure. The crude product was purified by flash chromatography (PE:EA= 5:1  $\rightarrow$  2:1) to give the protected alcohol **S16** (1.25 g, 3.53 mmol, 99%) as a colorless oil;  $R_f$  = 0.7 (PE:EA= 1:1).  $^1\text{H-NMR}$  (400 MHz,  $\text{CDCl}_3$ ,  $\text{CHCl}_3$  = 7.26 ppm)  $\delta$  7.30 (d,  $J$  = 8.4 Hz, 2H, PMB), 6.92 (d,  $J$  = 8.4 Hz, 2H, PMB), 4.53 (s, 2H, PMB), 3.90-3.81 (m, 1H, 4-H), 3.85 (s, 3H, PMB), 3.73-3.63 (m, 2H, 1-H), 3.51 (dd,  $J$  = 9.3, 3.7 Hz, 1H, 5-Ha), 3.38 (dd,  $J$  = 9.3, 7.4 Hz, 5-Hb), 2.86 (br. s, 1H, 4-OH), 1.75-1.50 (m, 2H, 2-H), 1.75-1.50 (m, 2H, 3-H), 0.93 (s, 9H, *Sit*-Bu), 0.09 (s, 6H, SiMe) ppm;  $^{13}\text{C-NMR}$  (100 MHz,  $\text{CDCl}_3$ ,  $\text{CDCl}_3$  = 77.16 ppm)  $\delta$  159.6 (s, PMB), 129.7 (d, PMB), 114.2 (d, PMB), 74.6 (d, C-4), 73.3 (t, PMB), 70.6 (t, C-5), 63.6 (t, C-1), 55.6 (q, PMB), 30.6 (t, C-2), 29.3 (t, C-3), 26.3 (q, *Sit*-Bu), 18.5 (s, *Sit*-Bu), -5.00 (q, SiMe) ppm; HRMS (ESI)  $m/z$  for  $\text{C}_{19}\text{H}_{35}\text{O}_4\text{Si}$   $[\text{M}+\text{H}]^+$ : calculated: 355.2305, found: 355.2305;  $[\alpha]^{20}_{\text{D}}$  = -2.3° ( $c$  = 1.0,  $\text{CHCl}_3$ ). HRMS-ESI  $m/z$  for  $\text{C}_{20}\text{H}_{36}\text{O}_4\text{SiNa}$   $[\text{M}+\text{Na}]^+$  calc. 391.2281, found 391.2285.

**(S)-5-(tert-Butyldimethylsilyloxy)-1-[(4-methoxybenzyl)oxy]-4-(methoxy)pentane (S17)**

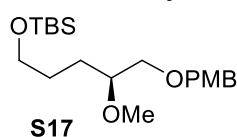

Alcohol **S16** (1.20 g, 3.39 mmol, 1.0 eq.) was dissolved in  $\text{Et}_2\text{O}$  (20 mL) under argon atmosphere, cooled to 0 °C, and NaH (60% suspension in mineral oil) (0.20 g, 5.08 mmol, 1.5 eq.) was added followed by MeI (0.21 mL, 0.53 mmol, 1.1 eq.).

The reaction mixture was warmed up to room temperature and stirred for 72 h. The reaction was terminated by addition of water. The phases were separated and the aqueous phase was extracted three times with ethyl acetate. The combined organic extracts were washed with brine, dried over  $\text{MgSO}_4$  and concentrated under reduced pressure. The crude product was purified by flash chromatography (PE:EA= 5:1  $\rightarrow$  2:1) to give the protected alcohol **S17** (1.09 g, 2.96 mmol, 88%) as a colorless oil;  $R_f$  = 0.5 (PE:EA= 2:1).  $^1\text{H-NMR}$  (400 MHz,  $\text{CDCl}_3$ ,  $\text{CHCl}_3$  = 7.26 ppm)  $\delta$  7.24 (d,  $J$  = 8.5 Hz, 2H, PMB), 6.87 (d,  $J$  = 8.5 Hz, 2H, PMB), 4.48 (s, 2H, PMB), 3.80 (s, 3H, PMB), 3.63-3.57 (m, 2H, 1-H), 3.45 (d,  $J$  = 4.8 Hz, 2H, 5-H), 3.04 (s, 3H, OMe), 3.38-3.34 (m, 1H, 4-H), 1.61-1.48 (m, 2H, 2-H), 1.61-1.48 (m, 2H, 3-H), 0.89 (s, 9H, *Sit*-Bu), 0.04 (s, 6H, SiMe) ppm;  $^{13}\text{C-NMR}$  (100 MHz,  $\text{CDCl}_3$ ,  $\text{CDCl}_3$  = 77.16 ppm)  $\delta$  159.5 (s, PMB), 130.8 (s, PMB), 129.6 (d, PMB), 114.1 (d, PMB), 80.3 (d, C-4), 73.3 (t, PMB), 72.1 (t, C-5), 63.5 (t, C-1), 57.8 (q, OMe), 55.6 (q, PMB), 29.0 (t, C-2), 28.1 (t, C-3), 26.3 (q, *Sit*-Bu), 18.7 (s, *Sit*-Bu), -4.9 (q, SiMe) ppm; HRMS (ESI)  $m/z$  for  $\text{C}_{20}\text{H}_{36}\text{O}_4\text{SiNa}$   $[\text{M}+\text{Na}]^+$ : calculated: 391.2281, found: 391.2290;  $[\alpha]^{20}_{\text{D}}$  = -6.0° ( $c$  = 1.0,  $\text{CHCl}_3$ )

**(S)-5-(tert-Butyldimethylsilyloxy)-4-methoxypentane-1-ol (S18)**

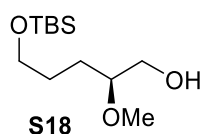

Alcohol **S17** (1.05 g, 2.85 mmol, 1.0 eq.) was dissolved in  $\text{CH}_2\text{Cl}_2$  (80 mL), cooled to 0 °C, and phosphate buffer (pH 7, 8 mL) and DDQ (0.78 g, 3.42 mmol, 1.2 eq.) were added.

The reaction mixture was warmed to room temperature and stirred for 1.5 h. The reaction was terminated by addition of an aqueous bicarbonate solution. The phases were separated and the aqueous phase was extracted three times with  $\text{CH}_2\text{Cl}_2$ . The combined organic extracts were washed with brine, dried over  $\text{MgSO}_4$  and concentrated under reduced pressure. The crude product was purified by flash chromatography (PE:EA= 5:1  $\rightarrow$  2:1) to afford the deprotected alcohol **S18** (0.65 g, 2.62 mmol, 92%) as a colorless oil;  $R_f$  = 0.4 (PE:EA= 2:1).  $^1\text{H-NMR}$  (400 MHz,  $\text{CDCl}_3$ ,  $\text{CHCl}_3$  = 7.26 ppm)  $\delta$  3.71-3.65 (m, 1H, 5-Ha), 3.63-3.60 (m, 2H, 1-H), 3.52-3.47 (m, 1H, 5-Hb), 3.04 (s, 3H, OMe), 3.32-3.27 (m, 1H, 4-H), 1.98-1.95 (m, 1H, OH), 1.65-1.47 (m, 2H, 3-H), 1.65-1.47 (m, 2H, 2-H), 0.89 (s, 9H, *Sit*-Bu), 0.05 (s, 6H, SiMe) ppm;  $^{13}\text{C-NMR}$  (100 MHz,  $\text{CDCl}_3$ ,  $\text{CDCl}_3$  = 77.16 ppm)  $\delta$  81.5 (d, C-4), 64.1 (t, C-5), 63.2 (t, C-1), 57.2 (q, OMe), 28.6 (t, C-2), 26.7 (t, C-3), 26.1 (q, *Sit*-Bu), 18.5 (s, *Sit*-Bu), -5.2 (q, SiMe) ppm; HRMS (ESI)  $m/z$  for  $\text{C}_{12}\text{H}_{28}\text{O}_3\text{SiNa}$   $[\text{M}+\text{Na}]^+$ : calculated: 271.1705, found: 271.1704;  $[\alpha]^{20}_{\text{D}}$  = +20.0° ( $c$  = 1.0,  $\text{CHCl}_3$ ).

**(S)-5-(tert-Butyldimethylsilyloxy)-4-methoxypentan-1-al (23)**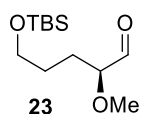

Alcohol **S30** (0.10 g, 0.40 mmol, 1.0 eq.) was dissolved in CH<sub>2</sub>Cl<sub>2</sub> (30 mL), cooled to 0 °C, and NaHCO<sub>3</sub> (0.04 g, 0.48 mmol, 1.2 eq.) was added followed by the Dess-Martin periodinane reagent (0.21 g, 0.48 mmol, 1.2 eq.).

The reaction mixture was heated to room temperature and stirred for 1 h. The reaction was terminated by addition of an aqueous Na<sub>2</sub>SO<sub>3</sub> solution. The phases were separated and the aqueous phase was extracted three times with CH<sub>2</sub>Cl<sub>2</sub>. The combined organic phases were washed with brine, dried over MgSO<sub>4</sub> and concentrated under reduced pressure. Aldehyde **S23** (0.10 g, 0.39 mmol, 99%) was obtained as a colorless foam; R<sub>f</sub> = 0.7 (PE:EtOAc = 2:1). The aldehyde **23** was used directly without further characterization.

**(3S,4R)-7-(tert-Butyldimethylsilyloxy)-4-methoxyhept-1-en-3-ol (24)**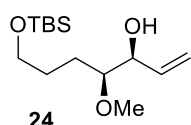

Aldehyde **23** (0.05 g, 0.20 mmol, 1.0 eq.) was dissolved in CH<sub>2</sub>Cl<sub>2</sub> (3.0 mL) under an argon atmosphere, cooled to 0 °C, and MgBr<sub>2</sub>·Et<sub>2</sub>O (0.13 g, 0.49 mmol, 2.4 eq.) was added.

The reaction mixture was stirred at 0 °C for 30 min, then cooled to 78 °C and vinyl magnesium bromide (0.72 mL, 0.51 mmol, 2.5 eq.) (0.7 M solution in THF) was added slowly. After 3 h, the reaction was terminated by addition of an aqueous NH<sub>4</sub>Cl solution. The phases were separated and the aqueous phase was extracted three times with CH<sub>2</sub>Cl<sub>2</sub>. The combined organic extracts were washed with brine solution, dried over MgSO<sub>4</sub> and concentrated under reduced pressure. The crude product was purified by flash chromatography (PE:EA= 5:1 → 2:1) to give alkene **24** (0.03 g, 0.10 mmol, 61%, from **S30**, *syn:anti* d.r. = 3:1) as a colorless oil; R<sub>f</sub> = 0.5 (PE:EA= 2:1). <sup>1</sup>H-NMR (400 MHz, CDCl<sub>3</sub>, CHCl<sub>3</sub> = 7.26 ppm) δ 5.89-5.80 (m, 1H, 6-H), 5.35 (d, *J* = 17.1 Hz, 1H, 7-Ha), 5.21 (d, *J* = 10.2 Hz, 1H, 7-Hb), 4.05-4.00 (m, 1H, 5-H), 3.63-3.57 (m, 2H, 1-H), 3.42 (s, 3H, OMe), 3.14-3.10 (m, 1H, 4-H), 2.55 (s, 1H, 5-OH), 1.70-1.48 (m, 2H, 3-H), 1.70-1.48 (m, 2H, 2-H), 0.89 (s, 9H, *Sit*-Bu), 0.04 (s, 6H, SiMe) ppm; <sup>13</sup>C-NMR (100 MHz, CDCl<sub>3</sub>, CDCl<sub>3</sub> = 77.16 ppm) δ 137.5 (d, C-6), 117.2 (t, C-7), 83.9 (d, C-4), 74.5 (t, C-5), 63.2 (t, C-1), 58.1 (q, OMe), 28.2 (t, C-2), 26.2 (t, C-3), 26.1 (q, *Sit*-Bu), 18.5 (s, *Sit*-Bu), -5.2 (q, SiMe); HRMS (ESI) *m/z* for C<sub>12</sub>H<sub>28</sub>O<sub>3</sub>SiNa [M+Na]<sup>+</sup>: calculated: 271.1705, found: 271.1704.

To verify the absolute configuration at C-5, the secondary alcohol was converted to the corresponding Mosher esters **S19a** and **S19b**,<sup>[S11]</sup> respectively, and analyzed by NMR spectroscopy.

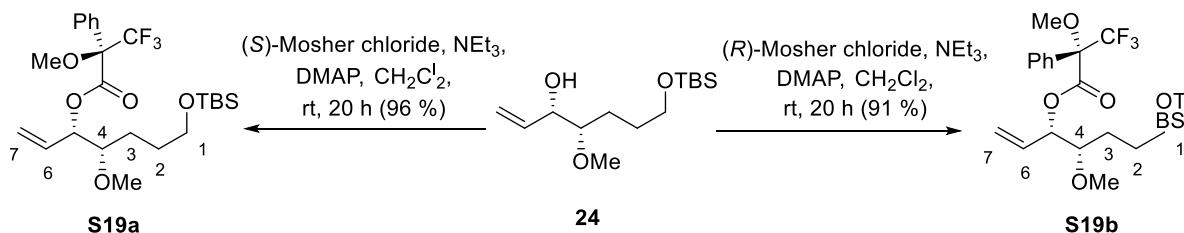

**Table S3:** Analysis of <sup>1</sup>H NMR spectra of Mosher esters **S19a** and **S19b**.

| signal | δ ( <i>R</i> )-Mosher ester [ppm] | δ ( <i>S</i> )-Mosher ester [ppm] | δ <i>S</i> - δ <i>R</i> |
|--------|-----------------------------------|-----------------------------------|-------------------------|
| H-6    | 5.84                              | 5.74                              | -0.10                   |
| H-7a   | 5.43                              | 5.32                              | -0.11                   |
| H-7b   | 5.34                              | 5.28                              | -0.06                   |
| H-4    | 3.27                              | 3.34                              | 0.07                    |
| OMe    | 3.24                              | 3.38                              | 0.14                    |

### 3.3.3 End game synthesis towards seco acid derivative 28

#### Olefine metathesis product 25

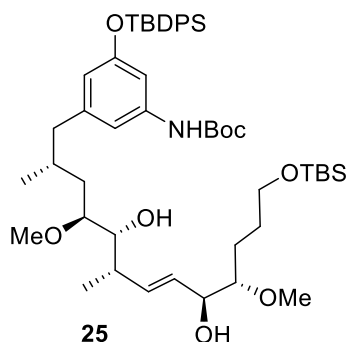

Alkene **19** (50.0 mg, 0.08 mmol, 1.0 eq.) was dissolved in (CH<sub>2</sub>Cl)<sub>2</sub> (3.0 mL) under argon atmosphere, alkene **24** (40.0 mg, 0.13 mmol, 1.7 eq.) and Grubbs-Hoveyda II catalyst (4.90 mg, 8.00 μmol, 0.1 eq.) were added, and the reaction mixture was heated to 40 °C. After 10 h each, a further amount of Grubbs-Hoyveda II catalyst (4.90 mg, 8.00 μmol, 0.1 eq.) was added in portions. After 48 h, the reaction mixture was cooled to room temperature and the solvent was removed under reduced pressure.

The crude product was purified by flash chromatography (PE:EA= 10:1 → 2:1) followed by preparative HPLC (C18-P) (H<sub>2</sub>O:MeOH = 80:20 {5 min}, gradient H<sub>2</sub>O:MeOH = 80:20 → 0:100 {85 min}, H<sub>2</sub>O:MeOH = 0:100 {10 min}, 15 mL/min) (*t<sub>r</sub>* = 83.0 min) was purified and alcohol **25** (27.0 mg, 30.7 μmol, 39%, 5*S*:5*R* d.r. = 6:1) was obtained as a colorless oil; *R<sub>f</sub>* = 0.1 (PE:EA= 2:3). <sup>1</sup>H-NMR (400 MHz, CDCl<sub>3</sub>, CHCl<sub>3</sub> = 7.26 ppm): δ 7.73-7.67 (m, 4H, SiPh), 7.42-7.33 (m, 6H, SiPh), 6.77 (s, 1H, Ph), 6.65 (s, 1H, Ph), 6.29 (s, 1H, NH), 6.16 (s, 1H, Ph), 5.60 (dd, *J* = 15.7, 8.3 Hz, 7-H), 5.48 (dd, *J* = 15.7, 5.6 Hz, 1H, 6-H), 4.01-3.95 (m, 1H, 5H), 3.63-3.55 (m, 1H, 9-H), 3.63-3.55 (m, 2H, 1-H), 3.41 (s, 3H, 4-OMe), 3.29 (s, 3H, 10-OMe), 3.23-3.15 (m, 1H, 4-H), 3.11-3.06 (m, 1H, 10-H), 2.54 (s, 1H, OH), 2.41 (dd, 1H, *J* = 13.4, 5.6 Hz, 13-Ha), 2.28-2.20 (m, 1H, 8H), 2.10-2.02 (m, 1H, 13-Hb), 1.80-1.71 (m, 1H, 12-H), 1.78-1.60 (m, 2H, 2-H), 1.78-1.60 (m, 2H, 3-H), 1.78-1.60 (m, 1H, 11-Ha), 1.48 (s, 9H, *t*-Bu), 1.12 (d, *J* = 6.6 Hz, 3H, 8-Me), 1.08 (s, 9H, *Sit*-Bu), 1.02-0.96 (m, 1H, 11-Hb), 0.89 (s, 9H, *Sit*-Bu), 0.59 (d, *J* = 6.5 Hz, 3H, 12-Me), 0.05 (s, 6H, SiMe) ppm; <sup>13</sup>C-NMR (100 MHz, CDCl<sub>3</sub>, CDCl<sub>3</sub> = 77.16 ppm) δ 155.9 (s, C-Ar), 152.7 (s, NHCOO), 143.1 (s, C-Ar), 139.0 (d, C-Ar), 135.6 (s, C-Ar), 134.4 (d, C-7), 133.1 (s, C-Ar), 130.0 (s, C-Ar), 129.9 (d, C-6), 127.9 (s, C-Ar), 115.6 (d, C-Ar), 112.3 (d, C-Ar), 107.6 (d, C-Ar), 84.0 (d, C-4), 80.1 (d, C-10), 73.7 (d, C-9), 73.6 (d, C-5), 63.3 (t, C-1), 58.2 (q, 4-OMe), 57.2 (q, 10-OMe), 44.7 (t, C-13), 38.8 (d, C-8), 35.1 (t, C-11), 30.9 (d, C-12), 28.5 (t, C-2), 28.3 (q, *t*-Bu), 26.6 (q, *Sit*-Bu), 26.2 (q, *Sit*-Bu), 26.1 (t, C-3), 19.6 (s, *Sit*-Bu), 18.8 (q, 12-Me), 18.5 (s, *Sit*-Bu), 17.4 (q, 8-Me), -5.1 (q, SiMe) ppm; HRMS (ESI) *m/z* for C<sub>50</sub>H<sub>79</sub>NO<sub>8</sub>Si<sub>2</sub>Na [M+Na]<sup>+</sup>: calculated: 900.5242, found: 900.5239.

#### Diol S20

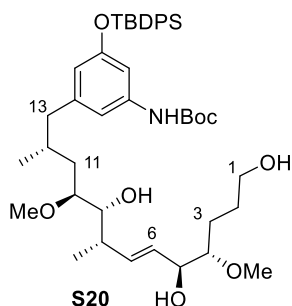

Alcohol **25** (15.0 mg, 17.1 μmol, 1.0 eq.) was dissolved in CH<sub>2</sub>Cl<sub>2</sub> (3.0 mL) under argon atmosphere, cooled to 0 °C, and added MeOH (2.0 mL) and CSA (2.00 mg, 5.10 μmol, 0.3 eq.). After 4 h, the reaction was terminated by addition of an aqueous bicarbonate solution. The phases were separated and the aqueous phase was extracted three times with CH<sub>2</sub>Cl<sub>2</sub>. The combined organic extracts were washed with brine, dried over MgSO<sub>4</sub> and concentrated under reduced pressure.

The crude product was purified by flash chromatography (PE:EA= 5:1 → 1:1) to afford alcohol **S20** (12.0 mg, 15.7 μmol, 92%) as a colorless oil; *R<sub>f</sub>* = 0.1 (PE:EA= 2:3). <sup>1</sup>H-NMR (400 MHz, CDCl<sub>3</sub>, CHCl<sub>3</sub> = 7.26 ppm): δ 7.73-7.67 (m, 4H, SiPh), 7.43-7.32 (m, 6H, SiPh), 6.82 (s, 1H, NH), 6.59 (s, 1H, Ph), 6.35 (s, 1H, Ph), 6.16 (s, 1H, Ph), 5.61 (dd, *J* = 15.8, 7.8 Hz, 1H, 7-H), 5.45 (dd, *J* = 15.8, 6.0 Hz, 6-H), 4.04-3.97 (m, 1H, 5-H), 3.68-3.61 (m, 2H, 1-H), 3.57 (dd, 1H, *J* = 7.9, 3.5 Hz, 9-H), 3.43 (s, 3H, 4-OMe), 3.29 (s, 3H, 10-OMe), 3.22-3.15 (m, 1H, 10-H), 3.13-3.08 (m, 1H, 4-H), 2.52 (s, 1H, OH), 2.43 (dd, *J* = 13.0, 5.8 Hz, 1H, 13-Ha), 2.30-2.20 (m, 1H, 8H), 2.07 (dd, 1H, *J* = 13.1, 8.8 Hz, 13-Hb), 1.80-1.58



(m, 1H, 12-H), 1.80-1.58 (m, 2H, 2-H), 1.80-1.58 (m, 2H, 3-H), 1.69-1.55 (m, 1H, 11-Ha), 1.47 (s, 9H, *t*-Bu), 1.30-1.20 (m, 1H, 11-Hb), 1.11 (d,  $J = 6.6$  Hz, 3H, 8-Me), 1.08 (s, 9H, *Sit*-Bu), 0.60 (d,  $J = 6.4$  Hz, 3H, 12-Me) ppm;  $^{13}\text{C}$ -NMR (100 MHz,  $\text{CDCl}_3$ ,  $\text{CDCl}_3 = 77.16$  ppm)  $\delta$  155.9 (s, C-Ar), 152.7 (s, NHCOO), 143.1 (s, C-Ar), 139.0 (d, C-Ar), 135.7 (s, C-Ar), 135.6 (d, C-7), 133.1 (d, C-Ar), 129.9 (s, C-Ar), 129.6 (d, C-6), 129.0 (s, C-Ar), 127.9 (s, C-Ar), 115.7 (d, C-19), 112.3 (d, C-15), 107.6 (d, C-17), 84.1 (d, C-4), 80.2 (d, C-10), 79.8 (s, *t*-Bu), 73.9 (d, C-5), 73.8 (d, C-9), 62.9 (t, C-1), 58.3 (q, 4-OMe), 57.1 (q, 10-OMe), 44.6 (t, C-13), 39.0 (d, C-8), 35.0 (t, C-11), 31.0 (d, C-12), 28.5 (q, *t*-Bu), 28.0 (t, C-3), 26.6 (q, *Sit*-Bu), 26.5 (t, C-2), 19.6 (q, 12-Me), 18.8 (s, *Sit*-Bu), 17.3 (q, 8-Me) ppm; HRMS (ESI)  $m/z$  for  $\text{C}_{44}\text{H}_{65}\text{NO}_8\text{SiNa}$   $[\text{M}+\text{Na}]^+$ : calculated: 786.4377, found: 786.4372.

### Per-*O*-silylated polyol **S21**

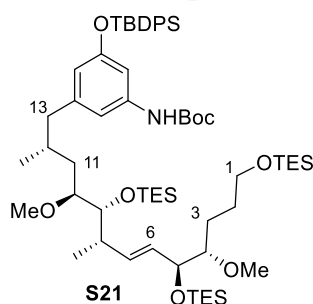

Alcohol **S20** (30.0 mg, 39.0  $\mu\text{mol}$ , 1.0 eq.) was dissolved in  $\text{CH}_2\text{Cl}_2$  (15 mL) under argon atmosphere, cooled to 0  $^\circ\text{C}$ , and mixed with 2,6-lutidine (23.0  $\mu\text{L}$ , 195  $\mu\text{mol}$ , 5.0 eq.) followed by TESOTf (30.0  $\mu\text{L}$ , 137  $\mu\text{mol}$ , 3.5 eq.). The reaction mixture was warmed up to room temperature and stirred for an additional 3 h. The reaction was terminated by addition of an aqueous  $\text{NH}_4\text{Cl}$  solution. The phases were separated and the aqueous phase was extracted three times with  $\text{CH}_2\text{Cl}_2$ .

The combined organic extracts were washed with brine, dried over  $\text{MgSO}_4$  and concentrated under reduced pressure. The crude product was purified by flash chromatography (PE:EA= 100:1  $\rightarrow$  20:1) to afford the protected alcohol **S21** (35.0 mg, 31.6  $\mu\text{mol}$ , 81%) as a colorless oil;  $R_f = 0.5$  (PE:EA= 10:1).  $^1\text{H}$ -NMR (400 MHz,  $\text{C}_6\text{D}_6$ ,  $\text{C}_6\text{D}_5\text{H} = 7.16$  ppm):  $\delta$  7.89-7.83 (m, 4H, SiPh), 7.27 (s, 1H, Ph), 7.23-7.19 (m, 6H, SiPh), 6.59 (s, 1H, Ph), 6.48 (s, 1H, Ph), 5.89 (s, 1H, NH), 5.66 (dd, 1H,  $J = 15.5, 6.3$  Hz, 7-H), 5.56 (dd, 1H,  $J = 15.5, 8.6$  Hz, 6-H), 4.38-4.34 (m, 1H, 5-H), 3.73-3.63 (m, 1H, 9-H), 3.73-3.63 (m, 2H, 1-H), 3.31 (s, 3H, 4-OMe), 3.35-3.30 (m, 1H, 10-H), 3.25 (s, 3H, 10-OMe), 3.22-3.17 (m, 1H, H-4), 2.46 (dd,  $J = 13.0, 5.7$  Hz, 1H, 13-Ha), 2.36-2.27 (m, 1H, 8-H), 2.12 (dd, 1H,  $J = 13.0, 9.0$  Hz, 13-Hb), 2.05-1.95 (m, 1H, 12-H), 1.93-1.84 (m, 1H, 2-Ha), 1.93-1.84 (m, 1H, 11-Ha), 1.79-1.68 (m, 1H, 3-Ha), 1.79-1.68 (m, 1H, 2-Hb), 1.64-1.50 (m, 1H, 3-Hb), 1.39 (s, 9H, *t*-Bu), 1.25 (d,  $J = 6.7$  Hz, 3H, 8-Me), 1.20 (s, 9H, *Sit*-Bu), 1.15-1.05 (m, 1H, 11-Hb), 1.12-1.03 (m, 27H,  $\text{SiCH}_2\text{CH}_3$ ), 0.79-0.60 (m, 18H,  $\text{SiCH}_2\text{CH}_3$ ), 0.79-0.60 (m, 3H, 12-Me) ppm;  $^{13}\text{C}$ -NMR (100 MHz,  $\text{C}_6\text{D}_6$ ,  $\text{C}_6\text{D}_6 = 128.06$  ppm)  $\delta$  156.4 (s, C-Ar), 152.3 (s, NHCOO), 143.5 (s, C-Ar), 140.1 (d, C-Ar), 136.0 (s, C-Ar), 134.7 (d, C-7), 133.7 (d, C-Ar), 130.2 (d, C-6), 130.1 (s, C-Ar), 115.7 (d, C-Ar), 112.4 (d, C-Ar), 107.9 (d, C-Ar), 85.4 (d, C-4), 81.4 (d, C-10), 79.5 (s, *t*-Bu), 76.5 (d, C-9), 74.1 (d, C-5), 63.4 (t, C-1), 58.3 (q, 4-OMe), 57.2 (q, 10-OMe), 45.2 (t, C-13), 41.2 (d, C-8), 35.9 (t, C-11), 31.6 (d, C-12), 30.2 (t, C-2), 28.3 (q, *t*-Bu), 26.8 (q, *Sit*-Bu), 26.6 (t, C-3), 19.8 (s, *Sit*-Bu), 19.3 (q, 12-Me), 18.8 (q, 8-Me), 7.5 (q,  $\text{SiCH}_2\text{CH}_3$ ), 7.3 (q,  $\text{SiCH}_2\text{CH}_3$ ), 7.2 (q,  $\text{SiCH}_2\text{CH}_3$ ), 5.7 (t,  $\text{SiCH}_2\text{CH}_3$ ), 5.5 (t,  $\text{SiCH}_2\text{CH}_3$ ), 4.9 (t,  $\text{SiCH}_2\text{CH}_3$ ) ppm; HRMS (ESI): The recording of high-resolution mass spectrometry could not be successfully performed for this molecule.

### Aldehyde **S22**

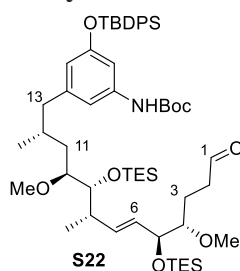

DMSO (3.9  $\mu\text{L}$ , 54  $\mu\text{mol}$ , 3.0 eq.) was dissolved in  $\text{CH}_2\text{Cl}_2$  (4.0 mL) under argon atmosphere, cooled to -78  $^\circ\text{C}$ , and oxalyl chloride (3.1  $\mu\text{L}$ , 36  $\mu\text{mol}$ , 2.0 eq.) was added. After 10 min, alcohol **S21** (20 mg, 18  $\mu\text{mol}$ , 1.0 eq.) was dissolved in  $\text{CH}_2\text{Cl}_2$  (0.6 mL) and added to the reaction mixture. After another 10 min, the reaction mixture was heated to 60  $^\circ\text{C}$  and stirred for 1.5 h. The reaction mixture was allowed to cool.

The reaction mixture was then cooled back to -78 °C, to which DIPEA (21  $\mu$ L, 126  $\mu$ mol, 7.0 eq.) was added and warmed up to room temperature. The reaction was terminated by addition of phosphate buffer (pH 7). The aqueous phase was extracted three times with  $\text{CH}_2\text{Cl}_2$ . The combined organic phases were washed brine, dried over  $\text{MgSO}_4$  and concentrated under reduced pressure (91 % crude). The crude product was purified by flash chromatography (PE:EA= 50:1  $\rightarrow$  10:1) to give aldehyde **S22** (13 mg, 13  $\mu$ mol, 73%) as a colorless oil;  $R_f$  = 0.4 (PE:EA= 9:1).  $^1\text{H}$ -NMR (400 MHz,  $\text{C}_6\text{D}_6$ ,  $\text{C}_6\text{D}_5\text{H}$  = 7.16 ppm):  $\delta$  9.44 (s, 1H, 1-H), 7.90-7.81 (m, 4H, SiPh), 7.24 (s, 1H, Ph), 7.22-7.19 (m, 6H, SiPh), 6.65 (s, 1H, Ph), 6.48 (s, 1H, Ph), 5.94 (s, 1H, NH), 5.51-5.46 (m, 1H, 7-H), 5.51-5.46 (m, 1H, 6-H), 4.25-4.20 (m, 1H, 5-H), 3.67 (d,  $J$  = 9.2 Hz, 1H, 9-H), 3.29-3.25 (m, 1H, 10-H), 3.23 (s, 3H, 4-OMe), 3.20 (s, 3H, 10-OMe), 3.07-3.00 (m, 1H, H-4), 2.49 (dd,  $J$  = 13.2, 5.6 Hz, 1H, 13-Ha), 2.34-2.23 (m, 1H, 8-H), 2.21-2.06 (m, 2H, 2-H), 2.21-2.06 (m, 1H, H-13b), 2.06-1.93 (m, 1H, 12-H), 1.93-1.78 (m, 1H, 3-Ha), 1.93-1.78 (m, 1H, 11-Ha), 1.66-1.52 (m, 1H, 3-Hb), 1.39 (s, 9H, *t*-Bu), 1.22 (d,  $J$  = 6.7 Hz, 3H, 8-Me), 1.19-1.12 (m, 1H, 11-Hb), 1.19 (s, 9H, *Sit*-Bu), 1.12-1.04 (m, 18H,  $\text{SiCH}_2\text{CH}_3$ ), 0.79-0.64 (m, 12H,  $\text{SiCH}_2\text{CH}_3$ ), 0.79-0.71 (m, 3H, 12-Me) ppm;  $^{13}\text{C}$ -NMR (100 MHz,  $\text{C}_6\text{D}_6$ ,  $\text{C}_6\text{D}_6$  = 128.06 ppm)  $\delta$  200.6 (t, C-1), 156.4 (s, C-Ar), 152.3 (s, NHCOO), 143.4 (s, C-Ar), 140.1 (d, C-Ar), 136.0 (s, C-Ar), 135.3 (d, C-7), 133.6 (d, C-Ar), 130.1 (s, C-Ar), 129.8 (d, C-6), 115.7 (d, C-Ar), 112.4 (d, C-Ar), 107.9 (d, C-Ar), 84.3 (d, C-4), 81.4 (d, C-10), 79.6 (s, *t*-Bu), 76.4 (d, C-9), 74.4 (d, C-5), 58.4 (q, 4-OMe), 57.2 (q, 10-OMe), 45.1 (t, C-13), 41.3 (d, C-8), 40.8 (t, C-2), 35.9 (t, C-11), 31.6 (d, C-12), 28.3 (q, *t*-Bu), 26.8 (q, *Sit*-Bu), 23.3 (t, C-3), 19.8 (s, *Sit*-Bu), 19.3 (q, 12-Me), 18.8 (q, 8-Me), 7.5 (q,  $\text{SiCH}_2\text{CH}_3$ ), 7.2 (q,  $\text{SiCH}_2\text{CH}_3$ ), 5.7 (t,  $\text{SiCH}_2\text{CH}_3$ ), 5.4 (t,  $\text{SiCH}_2\text{CH}_3$ ) ppm; HRMS (ESI): The recording of high-resolution mass spectrometry could not be successfully performed for this molecule.

### Hemiacetal **26**

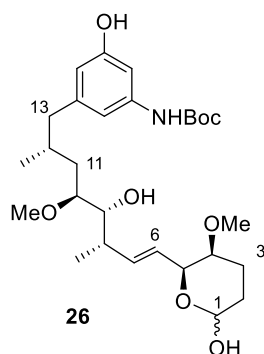

Aldehyde **S22** (21 mg, 21  $\mu$ mol, 1.0 eq.) was dissolved in THF (8.0 mL) under argon atmosphere and pyridine (1.0 mL) and  $\text{HF}\cdot\text{Py}$  (700  $\mu$ L) were added. After 4 days, the reaction was terminated by addition of an aqueous bicarbonate solution. The phases were separated and the aqueous phase was extracted three times with ethyl acetate. The combined organic extracts were washed with brine, dried over  $\text{MgSO}_4$  and concentrated under reduced pressure. The crude product was analyzed by preparative HPLC (C18 ISIS SP) ( $\text{H}_2\text{O}:\text{MeOH}$  = 90:10 {5 min}, gradient  $\text{H}_2\text{O}:\text{MeOH}$  = 90:10  $\rightarrow$  0:100 {55 min},  $\text{H}_2\text{O}:\text{MeOH}$  = 0:100 {10 min}, 2.5 mL/min) ( $t_R$  = 54.6 min) was purified to give lactol **26** (10 mg, 19  $\mu$ mol, 91%) as a colorless oil;  $R_f$  = 0.1 (PE:EA= 1:1). Compound

**26** was used directly in the next steps without further purification. HRMS (ESI)  $m/z$  for  $\text{C}_{28}\text{H}_{45}\text{NO}_8\text{Na}$   $[\text{M}+\text{Na}]^+$ : calculated: 546.3043, found: 546.3045.

### *N*-Boc SNAC-ester **27**

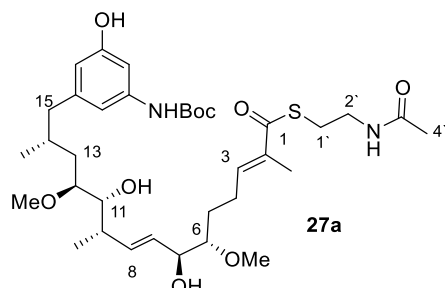

Lactol **26** (5.0 mg, 9.6  $\mu$ mol, 1.0 eq.) was dissolved in  $\text{CHCl}_3$  (0.2 mL) to which phosphorylide  $\text{Ph}_3\text{P}=\text{C}(\text{CH}_3)\text{C}(\text{O})\text{SCH}_2\text{CH}_2\text{NHAc}$  (21 mg, 49  $\mu$ mol, 5.0 eq.) was added and stirred at room temperature for 5 days. The solvent was removed under reduced pressure and the crude product was purified by flash chromatography (EtOAc). This was followed by preparative HPLC (C18 ISIS SP) ( $\text{H}_2\text{O}:\text{MeOH}$  = 70:30 {5 min}, gradient  $\text{H}_2\text{O}:\text{MeOH}$  = 70:30  $\rightarrow$  40:60 {45 min}, 40:60  $\rightarrow$  15:85 {40 min}, 15:85  $\rightarrow$  0:100 {10 min}, 2.5 mL/min) ( $t_R$  = 50.0 min). The SNAC ester **27a** (3.5 mg, 5.1  $\mu$ mol, 54%) was obtained as a colorless oil;  $R_f$  = 0.1 (EtOAc).  $^1\text{H}$ -NMR (400 MHz,  $\text{CDCl}_3$ ,  $\text{CHCl}_3$  = 7.26 ppm):  $\delta$  6.83 (s, 1H, Ph), 6.72 (t,  $J$  = 7.4 Hz, 1H, 3-H), 6.64 (s,

1H, Ph), 6.49 (s, 1H, OH), 6.41 (s, 1H, NH), 6.34 (s, 1H, Ph), 5.92 (s, 1H, NH), 5.62 (dd,  $J = 15.5, 8.8$  Hz, 1H, 9-H), 5.46 (dd,  $J = 15.5, 6.4$  Hz, 8-H), 4.03-3.99 (m, 1H, 7-H), 3.65-3.60 (m, 1H, 11-H), 3.51-3.41 (m, 2H, 2'-H), 3.44 (s, 3H, 6-OMe), 3.33 (s, 3H, 12-OMe), 3.26-3.20 (m, 1H, 12-H), 3.14-3.09 (m, 1H, 6-H), 3.07-3.00 (m, 2H, 1'-H), 2.58 (dd,  $J = 13.3, 5.5$  Hz, 1H, 15-Ha), 2.45 (d,  $J = 3.8$  Hz, 1H, 7-OH), 2.35-2.25 (m, 1H, 10-H), 2.35-2.25 (m, 2H, 4-H), 2.35-2.25 (m, 1H, 15-Hb), 2.14 (d,  $J = 2.4$  Hz, 1H, 11-OH), 1.98 (s, 3H, 4'-H), 1.97-1.90 (m, 1H, 14-H), 1.88 (s, 3H, 2-Me), 1.76-1.59 (m, 1H, 13-Ha), 1.76-1.59 (m, 1H, 5-Ha), 1.76-1.59 (m, 1H, 5-Hb), 1.50 (s, 9H, *t*-Bu), 1.28-1.17 (m, 1H, 13-Hb), 1.14 (d,  $J = 6.6$  Hz, 3H, 10-Me), 0.81 (d,  $J = 6.5$  Hz, 3H, 14-Me) ppm;  $^{13}\text{C}$ -NMR (100 MHz,  $\text{CDCl}_3$ ,  $\text{CDCl}_3 = 77.16$  ppm)  $\delta$  194.5 (s, C-1), 170.9 (s, C-3'), 156.8 (s, C-Ar), 152.8 (s, NHCOO), 143.4 (s, C-Ar), 141.3 (d, C-3), 139.5 (s, C-Ar), 136.3 (d, C-2), 135.8 (d, C-9), 129.6 (d, C-8), 111.4 (d, C-Ar), 111.2 (d, C-Ar), 103.5 (d, C-Ar), 83.4 (d, C-6), 80.3 (d, C-12), 73.9 (d, C-7), 73.6 (d, C-11), 58.6 (q, 6-OMe), 57.2 (q, 12-OMe), 44.6 (t, C-15), 40.0 (t, C-2'), 39.1 (d, C-10), 34.8 (t, C-13), 31.0 (d, C-14), 28.9 (t, C-1'), 28.5 (q, *t*-Bu), 28.5 (t, C-5), 24.4 (t, C-4), 23.4 (q, C-4'), 19.3 (q, 14-Me), 17.8 (q, 10-Me), 12.7 (q, 2-Me) ppm; HRMS (ESI)  $m/z$  for  $\text{C}_{35}\text{H}_{56}\text{N}_2\text{O}_9\text{SNa} [\text{M}+\text{Na}]^+$ : calculated: 703.3604, found: 703.3610.

### SNAC-ester **27b**

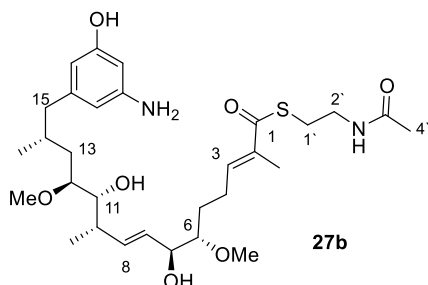

The SNAC ester **27a** (3.0 mg, 4.4  $\mu\text{mol}$ , 1.0 eq.) was dissolved in  $\text{CH}_2\text{Cl}_2$  (3.0 mL) under argon atmosphere, cooled to 0  $^\circ\text{C}$ , and TFA (350.0  $\mu\text{L}$ ) was added. After 3 h, the reaction was terminated by addition of an aqueous bicarbonate solution. The layers were separated and the aqueous phase was extracted three times with ethyl acetate.

The combined organic phases were washed with brine, dried over  $\text{MgSO}_4$  and concentrated under reduced pressure. The crude product was purified by preparative HPLC (C18 ISIS SP) ( $\text{H}_2\text{O}:\text{MeOH} = 70:30$  {5 min}, gradient  $\text{H}_2\text{O}:\text{MeOH} = 70:30 \rightarrow 40:60$  {80 min},  $40:60 \rightarrow 15:85$  {5 min},  $15:85 \rightarrow 0:100$  {10 min}, 2.5 mL/min) ( $t_R = 55.6$  min) to give SNAC ester **27b** (2.0 mg, 3.4  $\mu\text{mol}$ , 77%) as a colorless oil.  $^1\text{H}$ -NMR (400 MHz,  $\text{CDCl}_3$ ,  $\text{CHCl}_3 = 7.26$  ppm):  $\delta$  6.75-6.70 (m, 1H, 3-H), 6.23 (s, 1H, OH), 6.07 (s, 1H, Ph), 6.07 (s, 1H, Ph), 6.04 (s, 1H, Ph), 5.89 (s, 1H, NH), 5.62 (dd,  $J = 15.7, 8.2$  Hz, 1H, 9-H), 5.48 (dd,  $J = 15.7, 6.5$  Hz, 8-H), 4.05-4.00 (m, 1H, 7-H), 3.66-3.61 (m, 1H, 11-H), 3.49-3.46 (m, 2H, 2'-H), 3.44 (s, 3H, 6-OMe), 3.34 (s, 3H, 12-OMe), 3.26-3.21 (m, 1H, 12-H), 3.15-3.09 (m, 1H, 6-H), 3.09-3.06 (m, 2H, 1'-H), 2.53 (dd,  $J = 13.2, 5.8$  Hz, 1H, 15-Ha), 2.45 (d,  $J = 3.8$  Hz, 1H, 7-OH), 2.35-2.26 (m, 1H, 10-H), 2.35-2.26 (m, 2H, 4-H), 2.19 (dd,  $J = 13.2, 8.2$  Hz, 1H, 15-Hb), 2.12 (d,  $J = 2.4$  Hz, 1H, 11-OH), 1.97 (s, 3H, 4'-H), 1.98-1.88 (m, 1H, 14-H), 1.89 (s, 3H, 2-Me), 1.75-1.58 (m, 1H, 13-Ha), 1.73-1.62 (m, 2H, 5-H), 1.26-1.17 (m, 1H, 13-Hb), 1.14 (d,  $J = 6.6$  Hz, 3H, 10-Me), 0.82 (d,  $J = 6.4$  Hz, 3H, 14-Me) ppm;  $^{13}\text{C}$ -NMR (100 MHz,  $\text{CDCl}_3$ ,  $\text{CDCl}_3 = 77.16$  ppm)  $\delta$  194.4 (s, C-1), 170.9 (s, C-3'), 157.2 (s, C-Ar), 147.7 (s, C-Ar), 143.8 (d, C-3), 141.3 (s, C-Ar), 136.4 (s, C-2), 135.8 (d, C-9), 129.6 (d, C-8), 108.7 (d, C-Ar), 107.1 (d, C-Ar), 100.2 (d, C-Ar), 83.4 (d, C-6), 80.4 (d, C-12), 73.9 (d, C-7), 73.6 (d, C-11), 58.6 (q, 6-OMe), 57.2 (q, 12-OMe), 44.7 (t, C-15), 40.0 (t, C-2'), 39.0 (d, C-10), 34.9 (t, C-13), 30.9 (d, C-14), 28.9 (t, C-1'), 28.5 (t, C-5), 24.4 (t, C-4), 23.4 (q, C-4'), 19.4 (q, 14-Me), 17.7 (q, 10-Me), 12.7 (q, 2-Me) ppm; HRMS (ESI)  $m/z$  for  $\text{C}_{30}\text{H}_{49}\text{N}_2\text{O}_7\text{S} [\text{M}+\text{H}]^+$ : calculated: 581.3260, found: 581.3262;  $[\alpha]_D^{20} = -9.0^\circ$  ( $c = 0.6$ , MeOH).

### 3.3.4 End game synthesis towards seco acid derivative **29**

#### TBS-ether **S23**

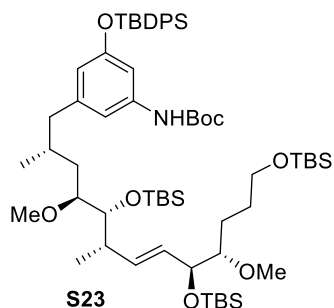

Diol **S23** (24.0 mg, 27.3  $\mu\text{mol}$ , 1.0 eq.) was dissolved in  $\text{CH}_2\text{Cl}_2$  (10 mL) under argon atmosphere, cooled to  $-78^\circ\text{C}$ , and 2,6-lutidine (15.6  $\mu\text{L}$ , 137  $\mu\text{mol}$ , 5.0 eq.) was added followed by TBSOTf (19.0  $\mu\text{L}$ , 82.0  $\mu\text{mol}$ , 3.0 eq.). The reaction mixture was heated to room temperature and stirring was continued for an additional 3 h at room temperature. The reaction was terminated by addition of an aqueous  $\text{NH}_4\text{Cl}$  solution. The phases were separated and the aqueous phase was extracted three times with  $\text{CH}_2\text{Cl}_2$ . The combined organic phases were washed with brine, dried over  $\text{MgSO}_4$ , filtered and concentrated under reduced pressure. The crude

product was purified by flash chromatography (PE:EtOAc = 100:1  $\rightarrow$  20:1) to afford the protected alcohol **S23** (28.0 mg, 25.3  $\mu\text{mol}$ , 93%, d.r. = 4:1) as a colorless oil;  $R_f$  = 0.5 (PE:EtOAc = 10:1).

$^1\text{H}$ -NMR (400 MHz,  $\text{CDCl}_3$ ,  $\text{CHCl}_3$  = 7.26 ppm):  $\delta$  7.74-7.68 (m, 4H, SiPh), 7.42-7.31 (m, 6H, SiPh), 6.71 (s, 1H, Ph), 6.68 (s, 1H, Ph), 6.24 (s, 1H, NH), 6.17 (s, 1H, Ph), 5.47-5.37 (m, 1H, 7-H), 5.47-5.37 (m, 1H, 6-H), 4.10-4.03 (m, 1H, 5-H), 3.65-3.47 (m, 1H, 9-H), 3.65-3.47 (m, 2H, 1-H), 3.38 (s, 3H, 4-OMe), 3.21 (s, 3H, 10-OMe), 3.15-3.09 (m, 1H, 10-H), 3.09-3.00 (m, 1H, H-4), 2.40 (dd,  $J$  = 13.2, 5.8 Hz, 1H, 13-Ha), 2.23-2.12 (m, 1H, 8-H), 2.05-2.00 (m, 1H, 13-Hb), 1.76-1.60 (m, 1H, 12-H), 1.76-1.60 (m, 1H, 2-Ha), 1.58-1.53 (m, 1H, 11-Ha), 1.56-1.49 (m, 1H, 2-Hb), 1.48-1.36 (m, 1H, 3-Ha), 1.25-1.17 (m, 1H, 3-Hb), 1.47 (s, 9H, *t*-Bu), 1.07-1.03 (m, 1H, 11-Hb), 1.07 (s, 9H, *Sit*-Bu), 1.03 (d,  $J$  = 6.7 Hz, 3H, 8-Me), 0.90 (s, 9H, *Sit*-Bu), 0.89 (s, 9H, *Sit*-Bu), 0.86 (s, 9H, *Sit*-Bu), 0.58 (d,  $J$  = 6.4 Hz, 3H, 12-Me), 0.07 (s, 3H, SiMe), 0.06 (s, 9H, SiMe), 0.04 (s, 6H, SiMe) ppm;  $^{13}\text{C}$ -NMR (100 MHz,  $\text{CDCl}_3$ ,  $\text{CDCl}_3$  = 77.16 ppm)  $\delta$  155.9 (s, C-Ar), 152.6 (s,  $\text{NHCOO}$ ), 143.4 (s, C-Ar), 138.9 (s, C-Ar), 135.6 (d, C-Ar), 134.6 (d, C-7), 133.2 (s, C-Ar), 130.5 (d, C-6), 129.8 (s, C-Ar), 127.8 (d, C-Ar), 115.6 (d, C-Ar), 112.3 (d, C-Ar), 107.5 (d, C-Ar), 85.3 (d, C-4), 81.3 (d, C-10), 80.3 (s, *t*-Bu), 75.3 (d, C-9), 73.7 (d, C-5), 63.5 (t, C-1), 58.5 (q, 4-OMe), 57.1 (q, 10-OMe), 44.7 (t, C-13), 40.7 (d, C-8), 36.0 (t, C-11), 31.2 (d, C-12), 29.2 (t, C-2), 28.5 (q, *t*-Bu), 26.7 (q, *Sit*-Bu), 26.3 (q, *Sit*-Bu), 26.1 (q, *Sit*-Bu), 25.8 (t, C-3), 19.6 (q, 12-Me), 19.0 (s, *Sit*-Bu), 18.6 (q, 8-Me), 18.3 (s, *Sit*-Bu), -3.8 (q, SiMe), -4.0 (q, SiMe), -4.6 (q, SiMe), -5.1 (q, SiMe) ppm; HRMS (ESI): The recording of high-resolution mass spectrometry could not be successfully performed for this molecule.

#### Alcohol **S24**

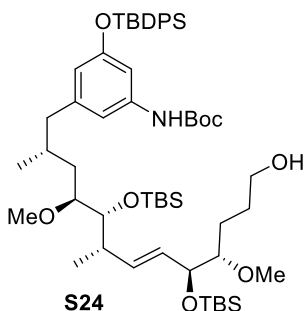

Silyl ether **S23** (10 mg, 9.0  $\mu\text{mol}$ , 1.0 eq.) was dissolved in  $\text{CH}_2\text{Cl}_2$  (2.0 mL) under argon atmosphere, cooled to  $0^\circ\text{C}$ , and added MeOH (1.3 mL) and CSA (0.6 mg, 2.7  $\mu\text{mol}$ , 0.3 eq.). After 4 h, the reaction was terminated by addition of an aqueous  $\text{NaHCO}_3$  solution. The aqueous phase was extracted three times with  $\text{CH}_2\text{Cl}_2$ . The combined organic phases were washed with aqueous NaCl solution, dried over  $\text{MgSO}_4$  and concentrated under reduced pressure. The crude product was purified by flash chromatography (PE:EtOAc = 10:1  $\rightarrow$  5:1) to give alcohol **S24** (8.0 mg, 8.1  $\mu\text{mol}$ , 88%, d.r. = 4:1) as a colorless oil;  $R_f$  = 0.1 (PE:EtOAc = 9:1).

$^1\text{H}$ -NMR (400 MHz,  $\text{CDCl}_3$ ,  $\text{CHCl}_3$  = 7.26 ppm):  $\delta$  7.74-7.67 (m, 4H, SiPh), 7.45-7.30 (m, 6H, SiPh), 6.73 (s, 1H, Ph), 6.65 (s, 1H, Ph), 6.30 (s, 1H, NH), 6.17 (s, 1H, Ph), 5.51-5.35 (m, 1H, 7-H), 5.51-5.35 (m, 1H, 6-H), 4.17-4.08 (m, 1H, 5-H), 3.67-3.57 (m, 2H, 1-H), 3.52 (dd,  $J$  = 8.7, 1.3 Hz, 1H, 9-H), 3.40 (s, 3H, 4-OMe), 3.21 (s, 3H, 10-OMe), 3.19-3.10 (m, 1H, 10-H), 3.10-3.03 (m, 1H, H-4), 2.42 (dd,  $J$  = 13.3, 5.6 Hz, 1H, 13-Ha), 2.23-2.15 (m, 1H, 8-H), 2.09-2.02 (m, 1H, 13-Hb), 1.74-1.60 (m, 1H, 12-H), 1.74-1.60 (m, 2H, 2-H), 1.60-1.46 (m, 2H, 3-H), 1.60-1.46 (m, 1H, 11-Ha), 1.47 (s, 9H, *t*-Bu), 1.07 (s, 9H, *Sit*-Bu), 1.03 (d,  $J$  = 6.7 Hz, 3H, 8-Me), 1.03-0.89 (m, 1H, 11-Hb), 0.89 (s, 9H, *Sit*-Bu), 0.86 (s, 9H,

*Sit*-Bu), 0.58 (d,  $J$  = 6.5 Hz, 3H, 12-Me), 0.06 (s, 3H, SiMe), 0.03 (s, 6H, SiMe), 0.02 (s, 3H, SiMe) ppm;  $^{13}\text{C}$ -NMR (100 MHz,  $\text{CDCl}_3$ ,  $\text{CDCl}_3$  = 77.16 ppm)  $\delta$  155.9 (s, C-Ar), 152.7 (s, NHCOO), 143.4 (s, C-Ar), 138.9 (s, C-Ar), 135.7 (d, C-Ar), 134.8 (d, C-7), 133.2 (s, C-Ar), 130.3 (d, C-6), 129.8 (s, C-Ar), 127.8 (d, C-Ar), 115.6 (d, C-Ar), 112.3 (d, C-Ar), 107.5 (d, C-Ar), 85.5 (d, C-4), 81.4 (d, C-10), 80.3 (s, *t*-Bu), 75.9 (d, C-9), 74.9 (d, C-5), 63.1 (t, C-1), 58.4 (q, 4-OMe), 57.1 (q, 10-OMe), 44.7 (t, C-13), 40.9 (d, C-8), 36.1 (t, C-11), 31.3 (d, C-12), 29.4 (t, C-2), 28.5 (q, *t*-Bu), 26.8 (t, C-3), 26.7 (q, *Sit*-Bu), 26.3 (q, *Sit*-Bu), 26.0 (q, *Sit*-Bu), 19.6 (s, *Sit*-Bu), 19.0 (q, 12-Me), 18.6 (s, *Sit*-Bu), 18.3 (q, 8-Me), -3.8 (q, SiMe), -4.0 (q, SiMe), -4.6 (q, SiMe) ppm; HRMS (ESI): The recording of high-resolution mass spectrometry could not be successfully performed for this molecule.

### Aldehyde **S25**

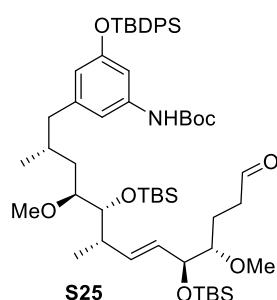

Alcohol **S24** (30.0 mg, 30.2  $\mu\text{mol}$ , 1.0 eq.) was dissolved in  $\text{CH}_2\text{Cl}_2$  (8.0 mL), cooled to 0  $^\circ\text{C}$ , and  $\text{NaHCO}_3$  (3.00 mg, 36.3  $\mu\text{mol}$ , 1.2 eq.) was added followed by the Dess-Martin reagent (15.4 mg, 36.3  $\mu\text{mol}$ , 1.2 eq.). The reaction mixture was warmed to room temperature and stirred for 1 h. The reaction was terminated by addition of an aqueous  $\text{Na}_2\text{SO}_3$  solution. The phases were separated and the aqueous phase was extracted three times with  $\text{CH}_2\text{Cl}_2$ . The combined organic phases were washed with brine, dried over  $\text{MgSO}_4$  and concentrated under reduced pressure. The crude product was purified by flash chromatography (PE:EtOAc = 50:1  $\rightarrow$  10:1) to give aldehyde **S25** (21.0 mg,

21.2  $\mu\text{mol}$ , 70%, d.r. = 4:1) as a colorless oil;  $R_f$  = 0.4 (PE:EtOAc = 9:1).

$^1\text{H}$ -NMR (400 MHz,  $\text{C}_6\text{D}_6$ ,  $\text{C}_6\text{D}_5\text{H}$  = 7.16 ppm):  $\delta$  9.44 (s, 1H, 1-H), 7.86-7.84 (m, 4H, SiPh), 7.21-7.17 (m, 6H, SiPh), 7.19 (s, 1H, 17-H), 6.65 (s, 1H, 15-H), 6.47 (s, 1H, 19-H), 5.97 (s, 1H, NH), 5.64 (dd,  $J$  = 15.5, 8.5 Hz, 1H, 7-H), 5.51 (dd,  $J$  = 15.5, 5.3 Hz, 1H, 6-H), 4.25-4.20 (m, 1H, 5-H), 3.67 (d,  $J$  = 8.5 Hz, 1H, 9-H), 3.31-3.25 (m, 1H, 10-H), 3.21 (s, 3H, 4-OMe), 3.18 (s, 3H, 10-OMe), 3.03-2.99 (m, 1H, H-4), 2.48 (dd,  $J$  = 12.6, 5.5 Hz, 1H, 13-Ha), 2.35-2.24 (m, 1H, 8-H), 2.18-2.08 (m, 2H, 2-H), 2.18-2.08 (m, 1H, H-13b), 2.01-1.92 (m, 1H, 12-H), 1.89-1.75 (m, 1H, 11-Ha), 1.89-1.75 (m, 1H, 3-Ha), 1.65-1.54 (m, 1H, 3-Hb), 1.39 (s, 9H, *t*-Bu), 1.19 (s, 9H, *Sit*-Bu), 1.16 (d,  $J$  = 6.8 Hz, 3H, 8-Me), 1.19-1.16 (m, 1H, 11-Hb), 1.07 (s, 9H, *Sit*-Bu), 1.01 (s, 9H, *Sit*-Bu), 0.75 (d,  $J$  = 6.5 Hz, 3H, 12-Me), 0.21 (s, 3H, SiMe), 0.15 (s, 6H, SiMe), 0.12 (s, 3H, SiMe) ppm;  $^{13}\text{C}$ -NMR (100 MHz,  $\text{C}_6\text{D}_6$ ,  $\text{C}_6\text{D}_6$  = 128.06 ppm)  $\delta$  200.6 (d, C-1), 156.5 (s, C-Ar), 152.4 (s, NHCOO), 143.5 (s, C-Ar), 140.2 (d, C-Ar), 136.1 (s, C-Ar), 135.2 (d, C-7), 133.7 (d, C-Ar), 130.2 (s, C-Ar), 129.5 (d, C-6), 115.8 (d, C-19), 112.6 (d, C-15), 108.0 (d, C-17), 84.6 (d, C-4), 81.6 (d, C-10), 79.7 (s, *t*-Bu), 76.8 (d, C-9), 73.9 (d, C-5), 58.5 (q, 4-OMe), 57.1 (q, 10-OMe), 45.1 (t, C-13), 40.9 (d, C-8), 40.7 (t, C-2), 36.4 (t, C-11), 31.8 (d, C-12), 28.4 (q, *t*-Bu), 26.9 (q, *Sit*-Bu), 26.6 (q, *Sit*-Bu), 26.3 (q, *Sit*-Bu), 23.3 (t, C-3), 19.9 (q, 12-Me), 19.5 (s, *Sit*-Bu), 19.0 (q, 8-Me), 18.6 (s, *Sit*-Bu), -3.4 (q, SiMe), -4.1 (q, SiMe), -4.5 (q, SiMe) ppm; HRMS (ESI). The recording of high-resolution mass spectrometry could not be successfully performed for this molecule.

### Ethyl thioester **29**

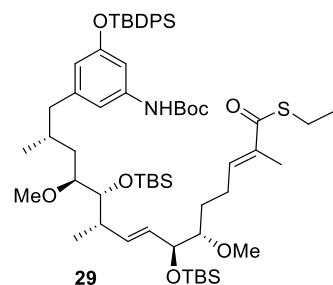

Aldehyde **S25** (14.0 mg, 14.1  $\mu\text{mol}$ , 1.0 eq.) was dissolved in  $\text{CHCl}_3$  (2.5 mL) and phosphorylide  $\text{Ph}_3\text{P}=\text{C}(\text{CH}_3)\text{C}(\text{O})\text{SEt}$  **28b** (6.20 mg, 16.9  $\mu\text{mol}$ , 1.2 eq.) was added. The reaction mixture was heated to 40  $^\circ\text{C}$  and stirred for an additional 24 h at 40  $^\circ\text{C}$ . The solvent was removed under reduced pressure, the crude product was purified by flash chromatography (PE:EtOAc = 20:1  $\rightarrow$  10:1), and thioester **29** (13.0 mg, 12.1  $\mu\text{mol}$ , 86%, d.r. = 4:1) was obtained as a colorless oil;  $R_f$  = 0.4 (PE:EtOAc = 10:1).



$^1\text{H-NMR}$  (400 MHz,  $\text{CDCl}_3$ ,  $\text{CHCl}_3 = 7.26$  ppm):  $\delta$  7.77-7.66 (m, 4H, SiPh), 7.45-7.29 (m, 6H, SiPh), 6.87 (ddd,  $J = 15.5, 9.3, 4.8$  Hz, 1H, 3-H), 6.72 (s, 1H, Ph), 6.68 (s, 1H, Ph), 6.26 (s, 1H, NH), 6.16 (s, 1H, Ph), 5.54-5.31 (m, 1H, 9-H), 5.54-5.31 (m, 1H, 8-H), 4.12-4.08 (m, 1H, 7-H), 3.52 (dd,  $J = 8.6, 1.3$  Hz, 1H, 11-H), 3.37 (s, 3H, 6-OMe), 3.21 (s, 3H, 12-OMe), 3.16-3.10 (m, 1H, 12-H), 3.05-2.97 (m, 1H, H-6), 2.97-2.87 (m, 2H,  $\text{SCH}_2\text{CH}_3$ ), 2.39 (dd,  $J = 13.3, 5.7$  Hz, 1H, 15-Ha), 2.35-2.26 (m, 1H, 4-Ha), 2.26-2.13 (m, 1H, 10-H), 2.26-2.13 (m, 1H, 4-Hb), 2.13-1.97 (m, 1H, H-15b), 1.80 (s, 3H, 2-Me), 1.77-1.60 (m, 1H, 14-H), 1.64-1.43 (m, 2H, 5-Ha), 1.63-1.50 (m, 1H, 13-Ha), 1.47 (s, 9H, *t*-Bu), 1.28-1.25 (m, 3H,  $\text{SCH}_2\text{CH}_3$ ), 1.08 (s, 9H, *Sit*-Bu), 1.04 (d,  $J = 6.7$  Hz, 3H, 10-Me), 1.05-1.00 (m, 1H, 13-Hb), 0.89 (s, 9H, *Sit*-Bu), 0.86 (s, 9H, *Sit*-Bu), 0.58 (d,  $J = 6.4$  Hz, 3H, 14-Me), 0.05 (s, 3H, SiMe), 0.03 (s, 6H, SiMe), 0.02 (s, 3H, SiMe) ppm;  $^{13}\text{C-NMR}$  (100 MHz,  $\text{CDCl}_3$ ,  $\text{CDCl}_3 = 77.16$  ppm)  $\delta$  190.3 (d, C-1), 155.9 (s, C-Ar), 152.6 (s, NHCOO), 145.3 (d, C-3), 143.3 (s, C-Ar), 139.0 (s, C-Ar), 135.9 (s, C-2), 135.7 (d, C-Ar), 135.1 (d, C-9), 133.2 (s, C-Ar), 130.2 (d, C-8), 129.9 (d, C-Ar), 127.8 (d, C-Ar), 115.6 (d, C-Ar), 112.3 (d, C-Ar), 107.6 (d, C-Ar), 84.4 (d, C-6), 81.3 (d, C-12), 80.3 (s, *t*-Bu), 75.9 (d, C-11), 74.7 (d, C-7), 58.5 (q, 6-OMe), 57.2 (q, 12-OMe), 44.7 (t, C-15), 40.8 (d, C-10), 36.0 (t, C-13), 31.2 (d, C-14), 28.6 (t, C-4), 28.6 (t, C-5), 28.5 (q, *t*-Bu), 26.7 (q, *Sit*-Bu), 26.3 (q, *Sit*-Bu), 26.0 (q, *Sit*-Bu), 23.2 (t,  $\text{SCH}_2\text{CH}_3$ ), 19.6 (s, *Sit*-Bu), 19.0 (q, 14-Me), 18.6 (s, *Sit*-Bu), 18.3 (q, 10-Me), 15.0 (q,  $\text{SCH}_2\text{CH}_3$ ), 12.4 (q, 2-Me), -3.8 (q, SiMe), -4.0 (q, SiMe), -4.6 (q, SiMe) ppm.

### Ethyl thioester S26

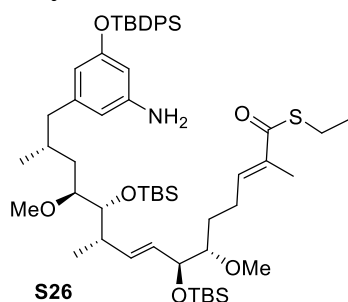

Thioester **29** (11.0 mg, 10.2  $\mu\text{mol}$ , 1.0 eq.) was dissolved in  $\text{CH}_2\text{Cl}_2$  (6.0 mL) under argon atmosphere, cooled to 0  $^\circ\text{C}$ , and TFA (400  $\mu\text{L}$ ) was added. After 4 h, the reaction was terminated by addition of an aqueous  $\text{NaHCO}_3$  solution. The phases were separated and the aqueous phase was extracted three times with  $\text{CH}_2\text{Cl}_2$ . The combined organic phases were washed with aqueous NaCl solution, dried over  $\text{MgSO}_4$ , filtered and concentrated under reduced pressure. The crude product was purified by flash chromatography (PE:EtOAc = 10:1  $\rightarrow$  3:1) to afford

amine **S26** (4.00 mg, 4.10  $\mu\text{mol}$ , 40%, d.r. = 4:1) as a colorless oil;  $R_f = 0.2$  (PE:EtOAc = 9:1).

$^1\text{H-NMR}$  (400 MHz,  $\text{CDCl}_3$ ,  $\text{CHCl}_3 = 7.26$  ppm):  $\delta$  7.79-7.66 (m, 4H, SiPh), 7.45-7.29 (m, 6H, SiPh), 6.95-6.79 (m, 1H, 3-H), 6.05 (s, 1H, Ph), 6.01 (s, 1H, Ph), 5.94 (s, 1H, Ph), 5.54-5.34 (m, 1H, 9-H), 5.54-5.34 (m, 1H, 8-H), 4.19-4.02 (m, 1H, 7-H), 3.59-3.53 (m, 1H, 11-H), 3.37 (s, 3H, 6-OMe), 3.23 (s, 3H, 12-OMe), 3.20-3.10 (m, 1H, 12-H), 3.05-2.98 (m, 1H, H-6), 2.98-2.93 (m, 2H,  $\text{SCH}_2\text{CH}_3$ ), 2.40 (dd,  $J = 13.3, 5.7$  Hz, 1H, 15-Ha), 2.35-2.26 (m, 1H, 4-Ha), 2.26-2.13 (m, 1H, 10-H), 2.26-2.13 (m, 1H, 4-Hb), 2.07-1.97 (m, 1H, H-15b), 1.82 (s, 3H, 2-Me), 1.80-1.70 (m, 1H, 14-H), 1.65-1.43 (m, 2H, 5-Ha), 1.65-1.43 (m, 1H, 13-Ha), 1.31-1.22 (m, 3H,  $\text{SCH}_2\text{CH}_3$ ), 1.07 (s, 9H, *Sit*-Bu), 1.04 (d,  $J = 6.8$  Hz, 3H, 10-Me), 1.05-1.00 (m, 1H, 13-Hb), 0.89 (s, 9H, *Sit*-Bu), 0.88 (s, 9H, *Sit*-Bu), 0.62 (d,  $J = 6.5$  Hz, 3H, 14-Me), 0.07 (s, 3H, SiMe), 0.05 (s, 6H, SiMe), 0.02 (s, 3H, SiMe) ppm.

### 3.3.5 Macrolactamizations

#### Progeldanamycin derivate S27 [S12]

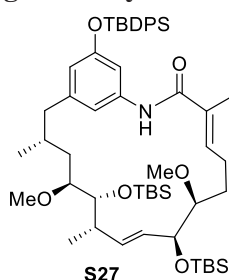

Thioester **S26** (4.0 mg, 4.1  $\mu\text{mol}$ , 1.0 eq.) was dissolved in THF (6.0 mL) under an argon atmosphere and 2,6-lutidine (40  $\mu\text{L}$ ) and silver nitrate (11 mg, 62  $\mu\text{mol}$ , 15 eq.) were added. The reaction mixture was stirred at 55  $^\circ\text{C}$  for 1.5d and then cooled to room temperature. The reaction was terminated by addition of an aqueous  $\text{CuSO}_4$  solution. The phases were separated and the aqueous layer was extracted three times with EtOAc. The combined organic phases were washed with brine, dried over  $\text{MgSO}_4$  and concentrated under reduced pressure. The crude product was purified by flash chromatography

(PE:EtOAc = 10:1→3:1) to afford progeldanamycin derivative **S27** (2.0 mg, 2.2  $\mu$ mol, 53%, d.r. = 4:1) as a colorless oil;  $R_f$  = 0.2 (PE:EtOAc = 9:1).

$^1\text{H-NMR}$  (400 MHz,  $\text{CDCl}_3$ ,  $\text{CHCl}_3$  = 7.26 ppm):  $\delta$  7.77-7.64 (m, 4H, SiPh), 7.47-7.34 (m, 6H, SiPh), 6.97-6.84 (m, 1H, 3-H), 6.47 (s, 1H, Ph), 6.40 (s, 1H, Ph), 6.28 (s, 1H, Ph), 5.43 (dd,  $J$  = 15.3, 8.5 Hz, 1H, 8-H), 5.30 (dd,  $J$  = 15.3, 5.9 Hz, 1H, 9-H), 4.37-4.30 (m, 1H, 7-H), 3.58-3.53 (m, 1H, 11-H), 3.42 (s, 3H, 6-OMe), 3.28 (s, 3H, 12-OMe), 3.20-3.12 (m, 1H, 12-H), 3.12-3.07 (m, 1H, H-6), 2.91-2.81 (m, 1H, 15-Ha), 2.28-2.15 (m, 1H, 10-H), 2.15-2.00 (m, 2H, 4-H), 2.15-2.00 (m, 1H, H-15b), 1.77 (s, 3H, 2-Me), 1.76-1.70 (m, 1H, 14-H), 1.65-1.43 (m, 2H, 5-H), 1.65-1.43 (m, 1H, 13-Ha), 1.13 (s, 9H, Sit-Bu), 1.09-1.00 (m, 1H, 13-Hb), 1.09 (d,  $J$  = 6.4 Hz, 3H, 10-Me), 0.92 (s, 9H, Sit-Bu), 0.90 (s, 9H, Sit-Bu), 0.56 (d,  $J$  = 6.2 Hz, 3H, 14-Me), 0.09 (s, 3H, SiMe), 0.06 (s, 6H, SiMe), 0.04 (s, 3H, SiMe) ppm. The crude material was directly employed in the next step.

### Progeldanamycin derivate 30

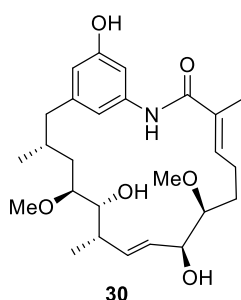

Progeldanamycin derivative **S27** (2.0 mg, 2.2  $\mu$ mol, 1.0 eq.) was dissolved in THF (2.0 mL) under argon atmosphere and pyridine (500  $\mu$ L) and HF\*Py (500  $\mu$ L) were added. After 7 days, the reaction was terminated by addition of an aqueous  $\text{NaHCO}_3$  solution. The phases were separated and the aqueous phase was extracted three times with EtOAc. The combined organic phases were washed with  $\text{CuSO}_4$  solution, dried over  $\text{MgSO}_4$ , filtered and concentrated under reduced pressure. The crude product was purified by preparative HPLC (C18 ISIS SP) ( $\text{H}_2\text{O}:\text{MeOH}$  = 90:10 {5 min}, gradient  $\text{H}_2\text{O}:\text{MeOH}$  = 90:10  $\rightarrow$  40:60 {65 min},  $\text{H}_2\text{O}:\text{MeOH}$  = 40:60  $\rightarrow$  0:100 {20 min},  $\text{H}_2\text{O}:\text{MeOH}$  = 0:100 {10 min}, 2.5 mL/min) ( $R_t$  = 36.5 min). Lactam **30** (0.6 mg, 1.3  $\mu$ mol, 60%) and starting lactam **S27** (0.2 mg, 0.5  $\mu$ mol, 20%) were obtained as colorless oils.

**30**:  $^1\text{H-NMR}$  (500 MHz, MeOD, MeOD = 3.31 ppm):  $\delta$  6.89-6.80 (m, 1H, 3-H), 6.49 (s, 1H, Ph), 6.42 (s, 1H, Ph), 6.37 (s, 1H, Ph), 5.52-5.40 (m, 1H, 8-H), 5.52-5.40 (m, 1H, 9-H), 4.23 (d,  $J$  = 5.4 Hz, 1H, 7-H), 3.65-3.54 (m, 1H, 11-H), 3.41 (s, 3H, 6-OMe), 3.34 (s, 3H, 12-OMe), 3.34-3.20 (m, 1H, 12-H), 3.13-3.05 (m, 1H, H-6), 2.97-2.81 (m, 1H, 15-Ha), 2.46-2.34 (m, 1H, 4-Ha), 2.24-2.15 (m, 1H, 10-H), 2.15-2.10 (m, 1H, H-15b), 2.10-1.96 (m, 1H, 4-Hb), 1.94 (s, 3H, 2-Me), 1.80-1.70 (m, 1H, 14-H), 1.73-1.59 (m, 1H, 5-Ha), 1.73-1.59 (m, 1H, 13-Ha), 1.48-1.36 (m, 1H, 5-Hb), 1.27-1.19 (m, 1H, 13-Hb), 1.12 (d,  $J$  = 6.4 Hz, 3H, 10-Me), 0.76 (d,  $J$  = 6.2 Hz, 3H, 14-Me);  $^{13}\text{C-NMR}$  (125 MHz, MeOD, MeOD = 49.0 ppm):  $\delta$  166.4 (d, C-1), 159.4 (s, C-Ar), 146.5 (d, C-3), 139.4 (s, C-Ar), 137.2 (d, C-9), 137.0 (s, C-2), 133.8 (s, C-Ar), 130.4 (d, C-8), 120.7 (d, C-Ar), 115.2 (d, C-Ar), 109.3 (d, C-Ar), 86.3 (d, C-6), 83.3 (d, C-12), 74.0 (d, C-11), 74.0 (d, C-7), 58.1 (q, 6-OMe), 58.1 (q, 12-OMe), 44.8 (t, C-15), 41.9 (d, C-10), 35.8 (t, C-13), 33.5 (d, C-14), 30.6 (t, C-4), 28.9 (t, C-5), 19.9 (q, 14-Me), 19.1 (q, 10-Me) 13.7 (q, 2-Me) ppm; HRMS (ESI)  $m/z$  for  $\text{C}_{26}\text{H}_{39}\text{NO}_6\text{Na}$  [ $\text{M}+\text{Na}$ ] $^+$ : calculated: 484.2675, found: 484.2669.

### 4. Biotransformation of SNAC ester 27b using amide synthase *ShGdmF*

SNAC ester **27b** (0.2 mg, 0.4  $\mu$ mol,) in Hepes-buffer (25 mM Hepes, 150 mM NaCl, pH 6.8) was incubated with *ShGdmF* for 24 h at 37°C and the reaction mixture was extracted with ethylacetate (5 mL). The phases were separated and the ethyl acetate extract was analyzed by mass spectrometry that revealed formation of macrolactam **30** as well as the hydrolysis product **29** (Figure S7).

**Figure S8:** Mass spectra of the enzymatic reaction with SNAC ester **27b**; a: negative control, b: progeldanamycin derivative **30** [M+Na], c: *seco* acid **31** [M+H], d: SNAC ester **27b** [M+H].

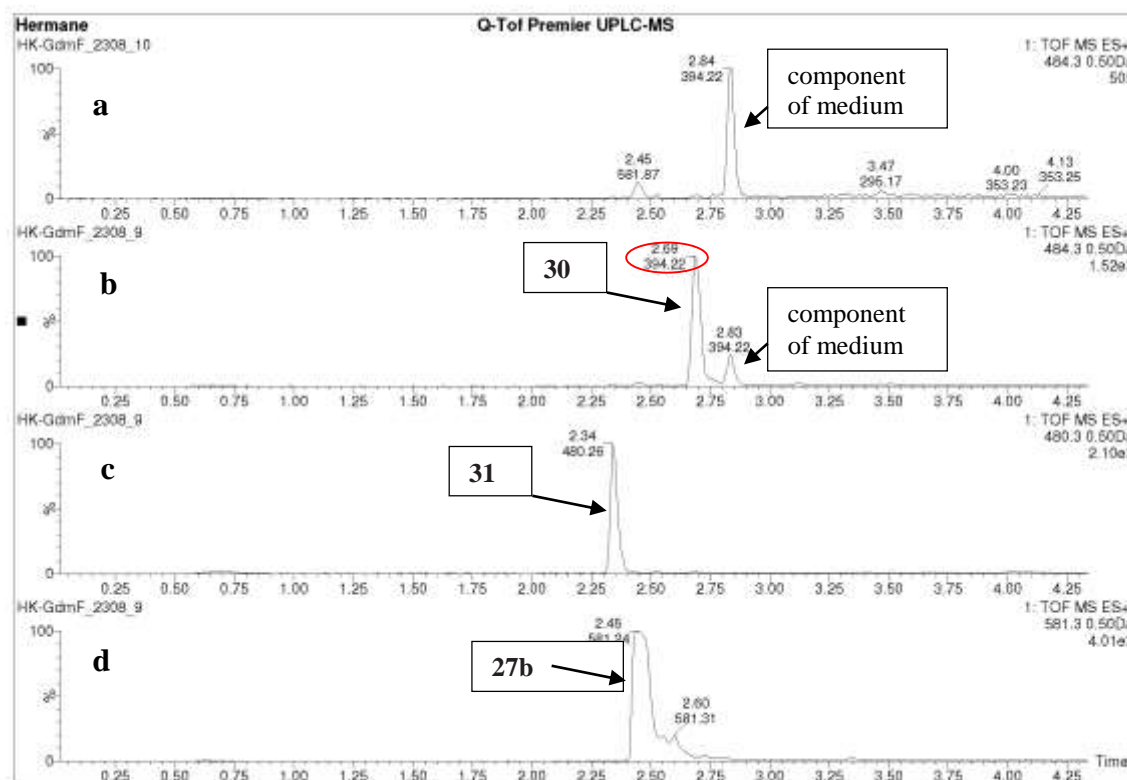

The structure of progeldanamycin derivative **30** was confirmed by MS/MS fragmentation experiment (Figure S8).

**Figure S9:** MS-MS fragmentation experiment of progeldanamycine derivative **30**.

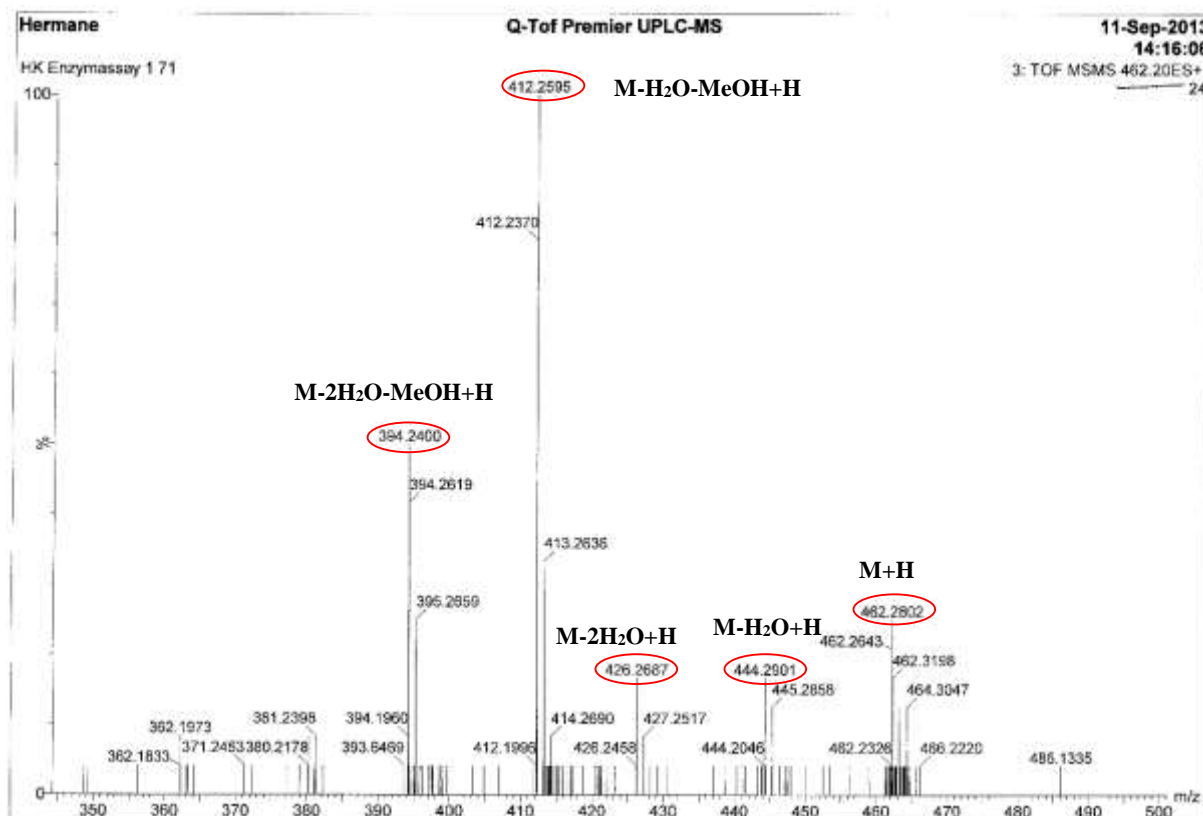

## 5. References (Supporting information)

- [S1] N. M. Gaudelli, C. A. Townsend, *J. Org. Chem.* **2013**, 78, 6412–6426.
- [S2] D. M. Roberts, C. Bartel, A. Scott, D. Ivison, T. J. Simpson, R. J. Cox, *Chem. Sci.* **2017**, 8, 1116–1126.
- [S3] F. Pfrenge, V. Dekaris, L. Schefzig, R. Zimmer, H. U. Reissig, *Synlett* **2008**, 2965–2968.
- [S4] P. D. Walker, C. Williams, A. N. M. Weir, L. Wang, J. Crosby, P. R. Race, T. J. Simpson, C. L. Willis, M. P. Crump, *Angew. Chem. Int. Ed.* **2019**, 58, 12446–12450.
- [S5] O. Vergnolle, F. Hahn, A. Baerga-Ortiz, P. F. Leadlay, J. N. Andexer, *ChemBioChem* **2011**, 12, 1011–1014.
- [S6] W. Seubert, F. Lynen, *J. Am. Chem. Soc.* **1953**, 75, 2787–2788.
- [S7] K. K. Sharma, C. N. Boddy, *Bioorg. Med. Chem. Lett.* **2007**, 17, 3034–3037.
- [S8] A. Dey, M. T. Kirchner, V. R. Vangala, G. R. Desiraju, R. Mondal, J. A. K. Howard, *J. Am. Chem. Soc.* **2005**, 127, 10545–10559.
- [S9] U. Ravid, R. M. Silverstein, L. R. Smith, *Tetrahedron* **1978**, 34, 1449–1452.
- [S10] R. A. Pilli, M. M. Victor, A. de Meijere, *J. Org. Chem.* **2000**, 65, 5910–5916.
- [S11] T. R. Hoye, C. S. Jeffrey, F. Shao, *Nat. Protoc.* **2007**, 2451–2458.
- [S12] G. E. Keck, J. A. Murry, *J. Org. Chem.* **1991**, 56, 6606–6611.

# Attachment: Copies of $^1\text{H}$ - and $^{13}\text{C}$ -NMR spectra

**Figure S10:**  $^1\text{H}$  NMR spectrum of compound **S15**.

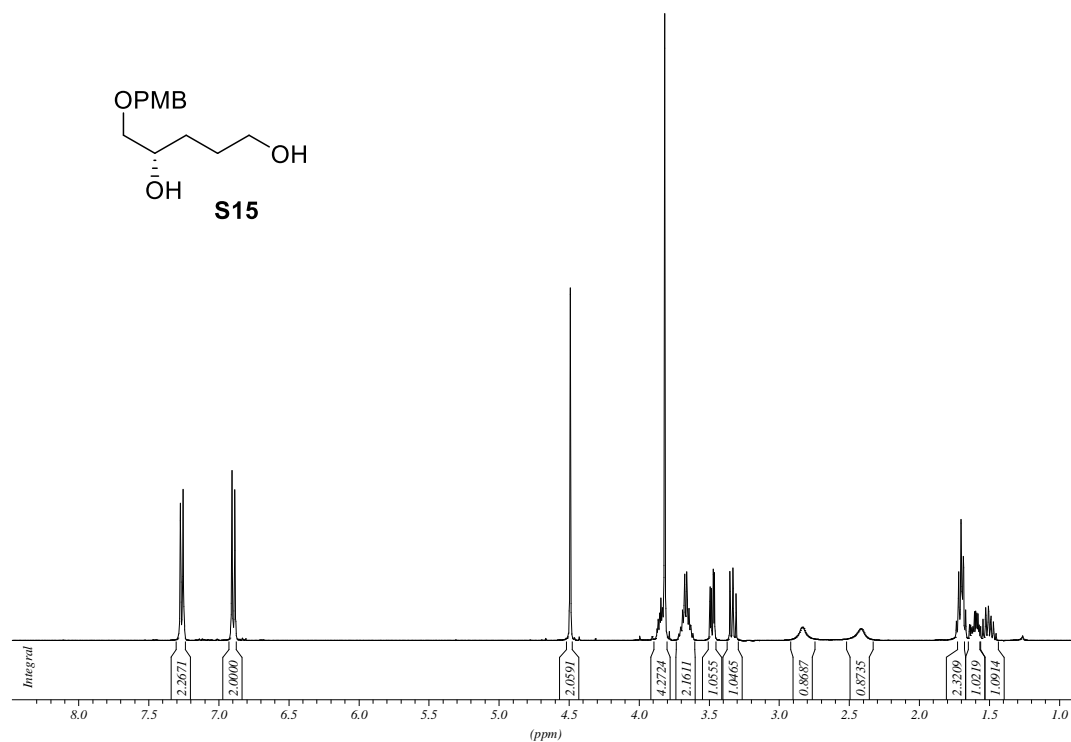

**Figure S11:**  $^{13}\text{C}$  NMR spectrum of compound **S15**.

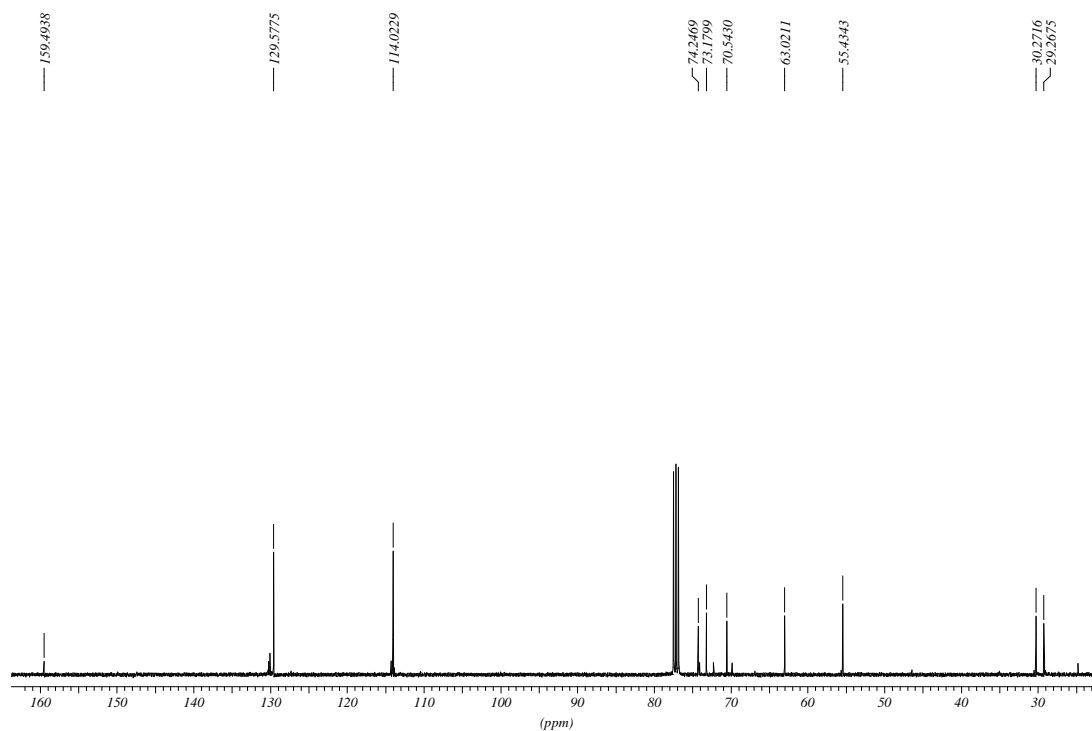



**Figure S12:**  $^1\text{H}$  NMR spectrum of compound **S16**.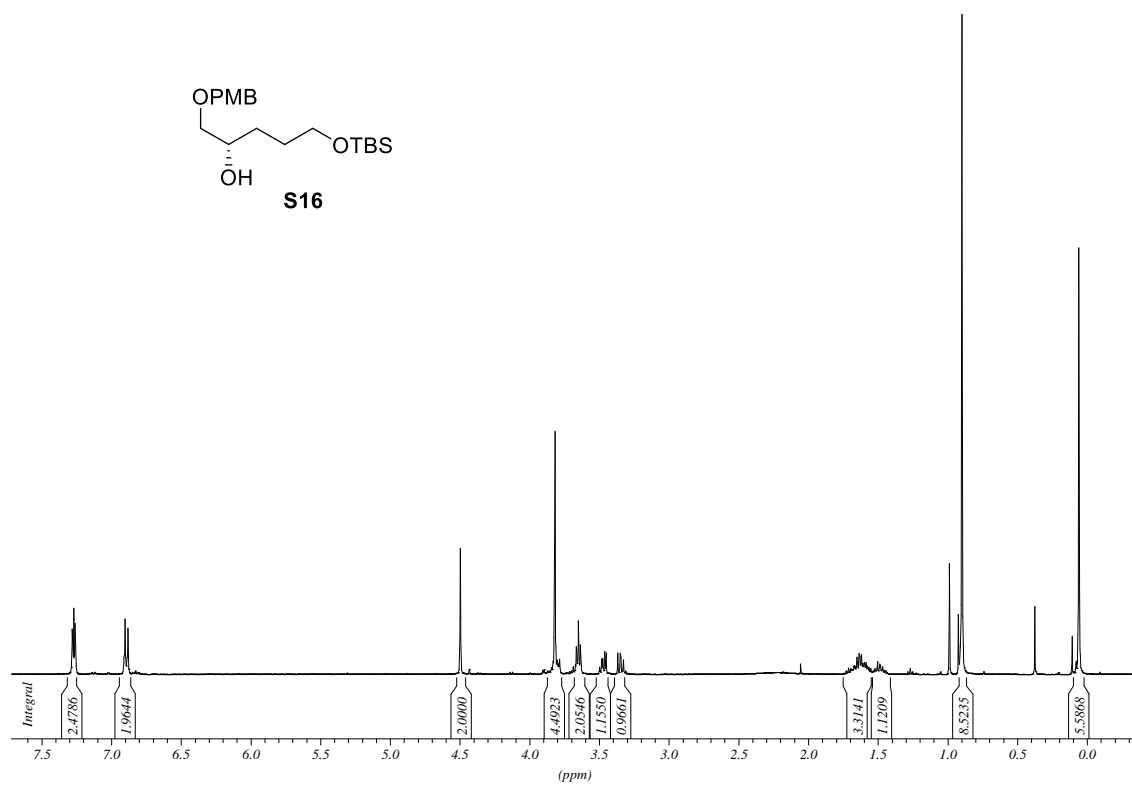**Figure S13:**  $^{13}\text{C}$  NMR spectrum of compound **S16**.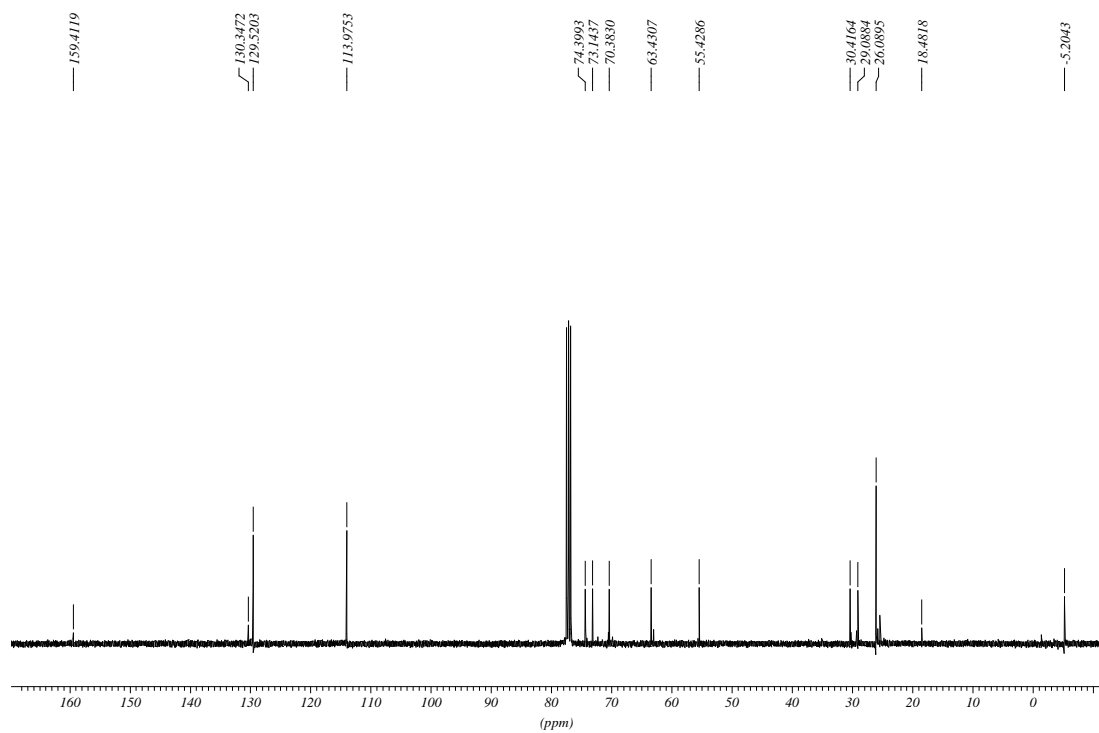

**Figure S14:**  $^1\text{H}$  NMR spectrum of compound **S17**.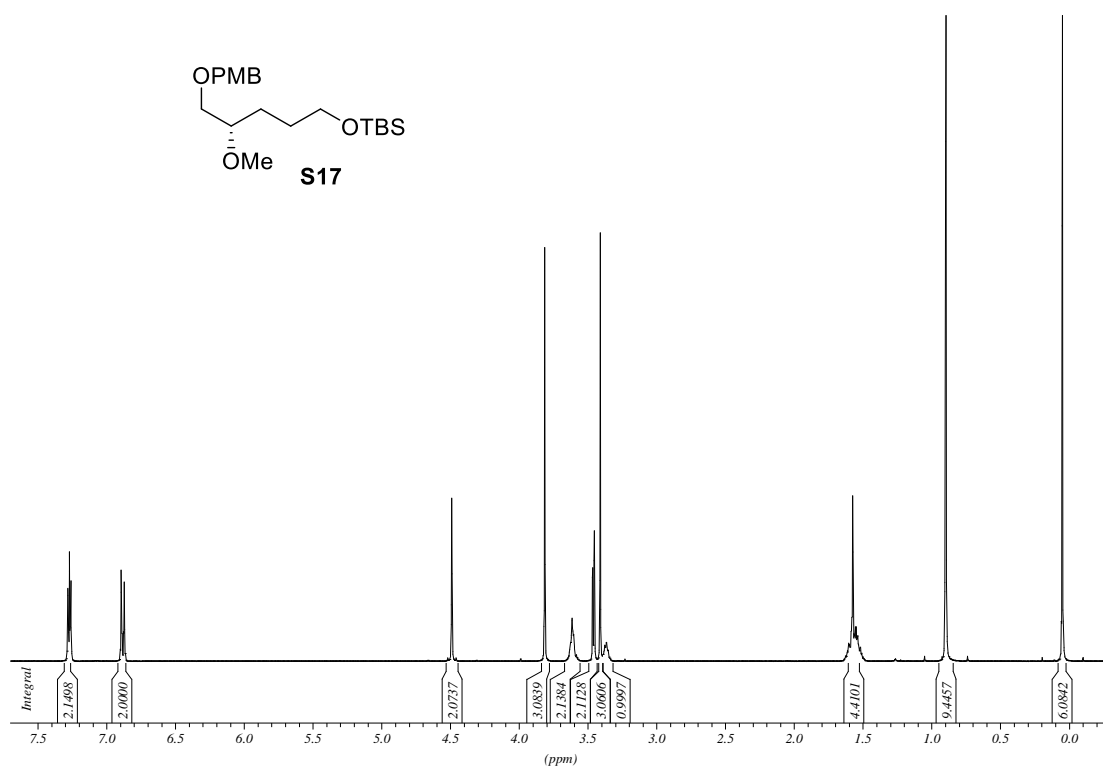**Figure S15:**  $^{13}\text{C}$  NMR spectrum of compound **S17**.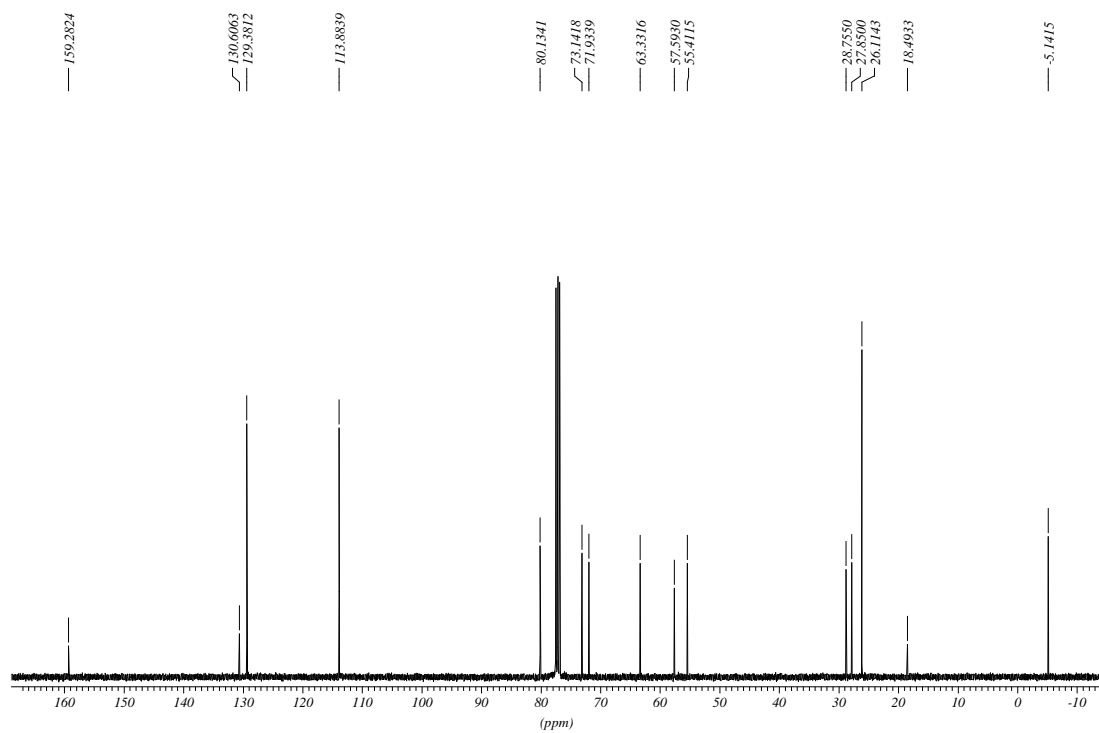

**Figure S16:**  $^1\text{H}$  NMR spectrum of compound **S18**.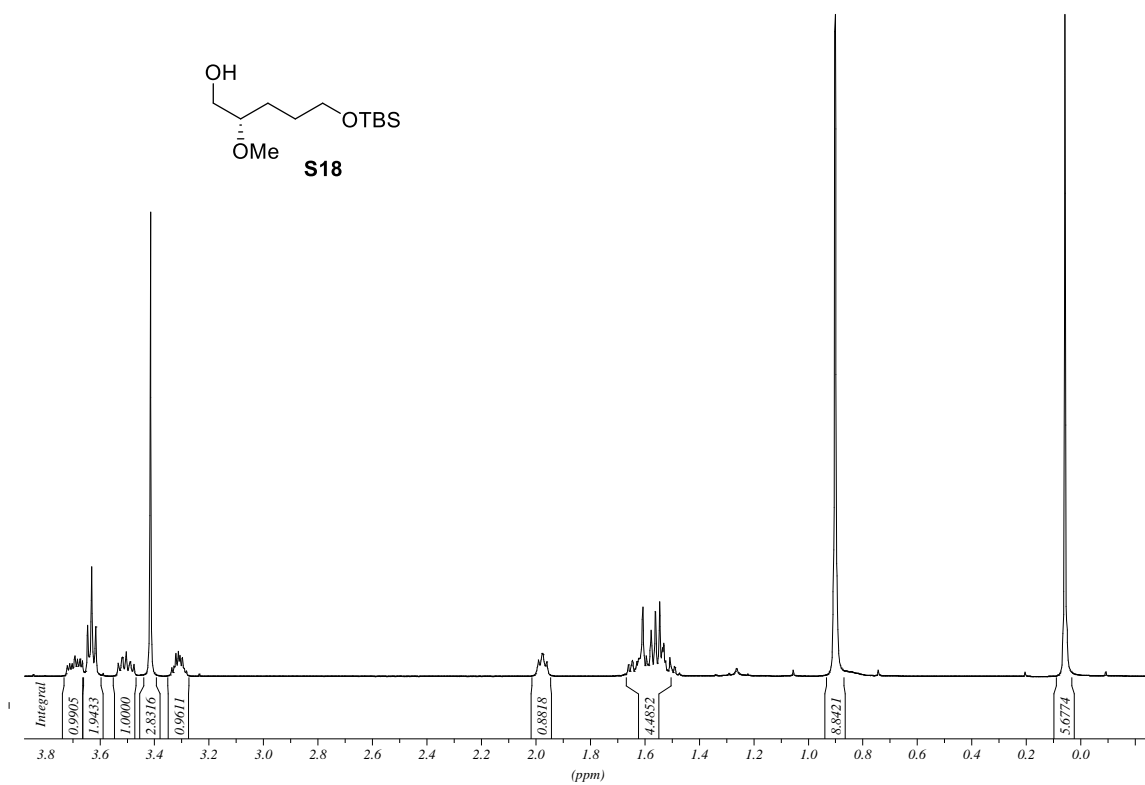**Figure S17:**  $^{13}\text{C}$  NMR spectrum of compound **S18**.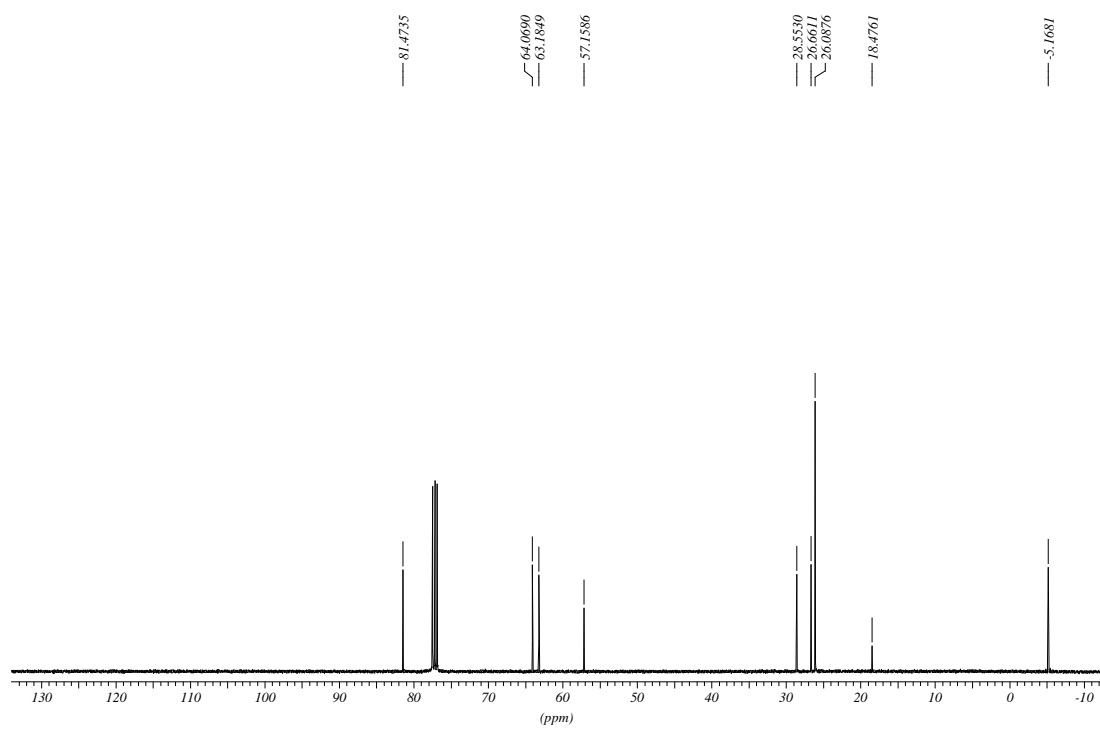

**Figure S18:**  $^1\text{H}$  NMR spectrum of compound **S19a**.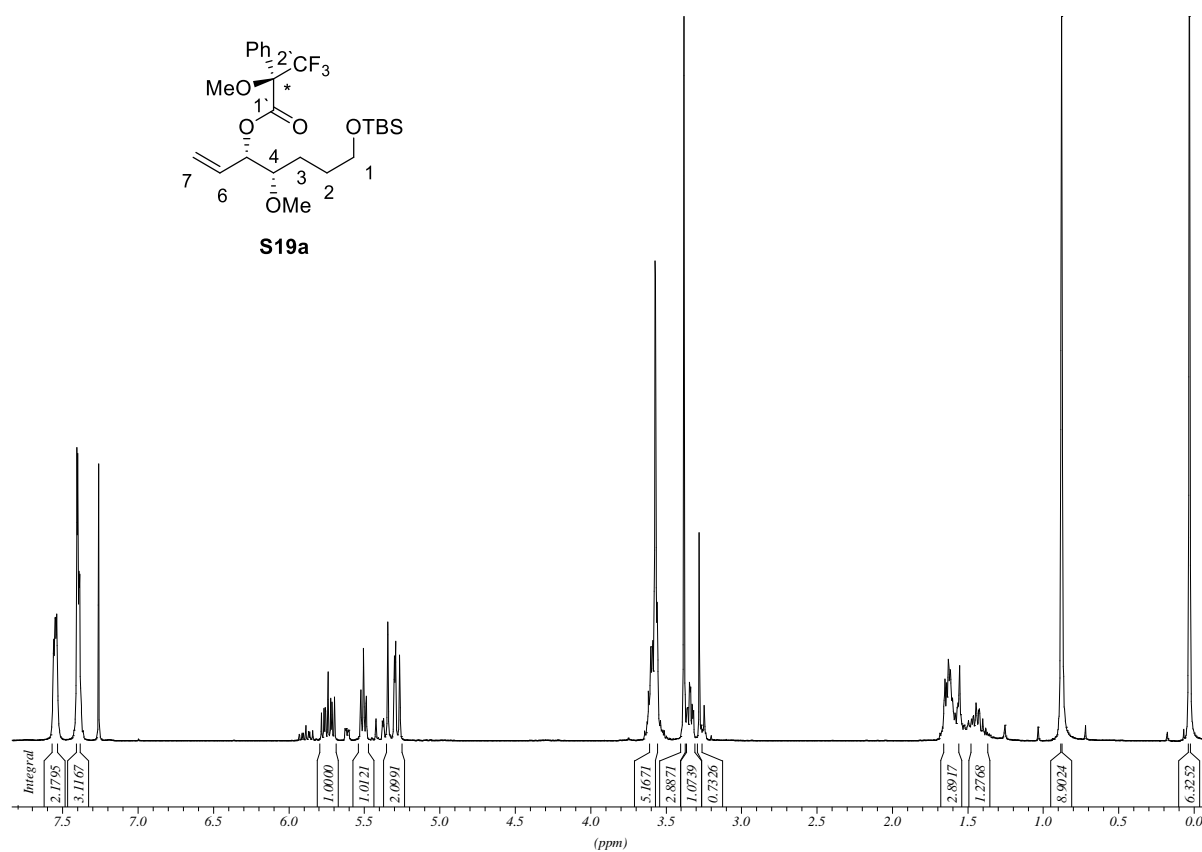**Figure S19:**  $^1\text{H}$  NMR spectrum of compound **S19b**.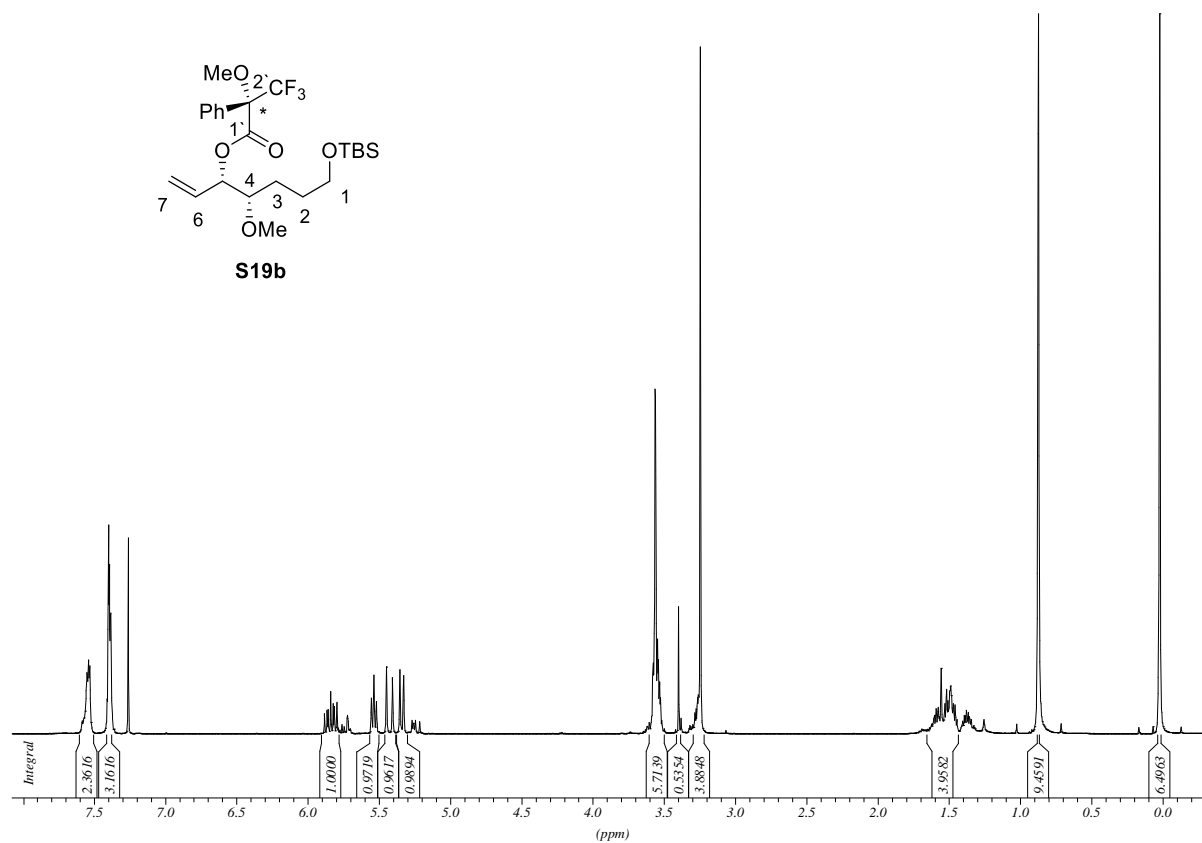

**Figure S20:**  $^1\text{H}$  NMR spectrum of compound **24**.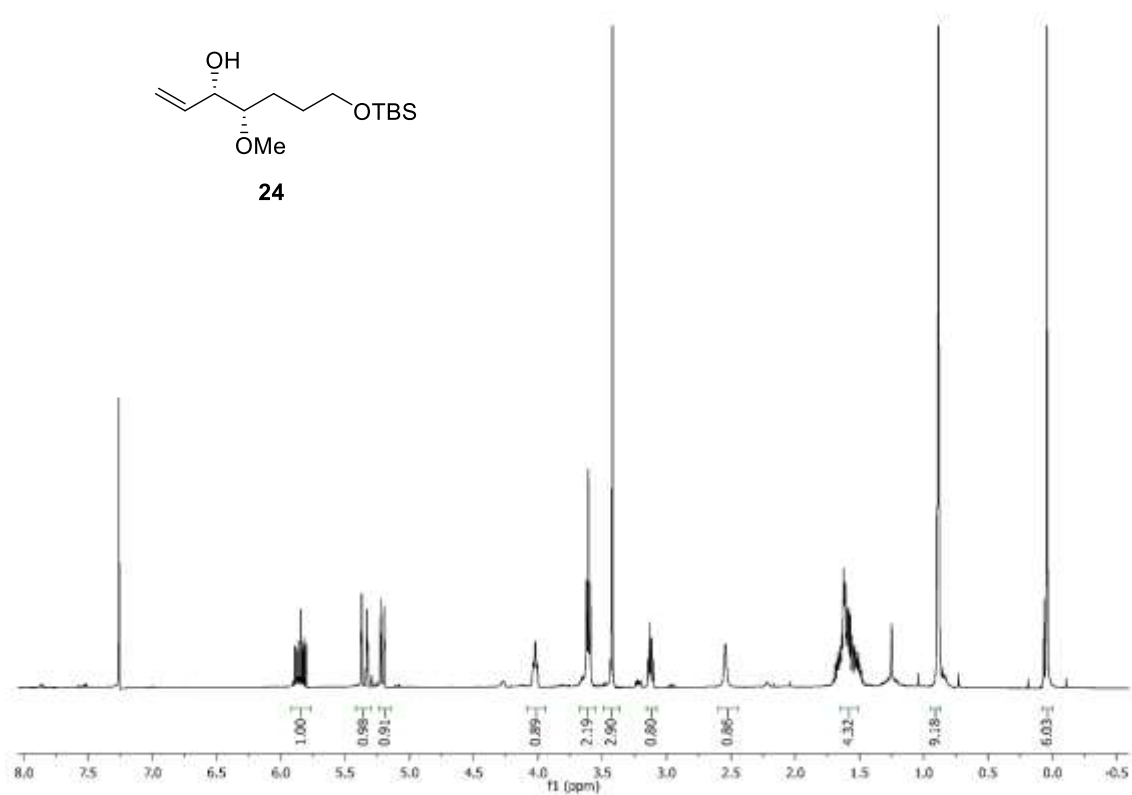**Figure S21:**  $^{13}\text{C}$  NMR spectrum of compound **24**.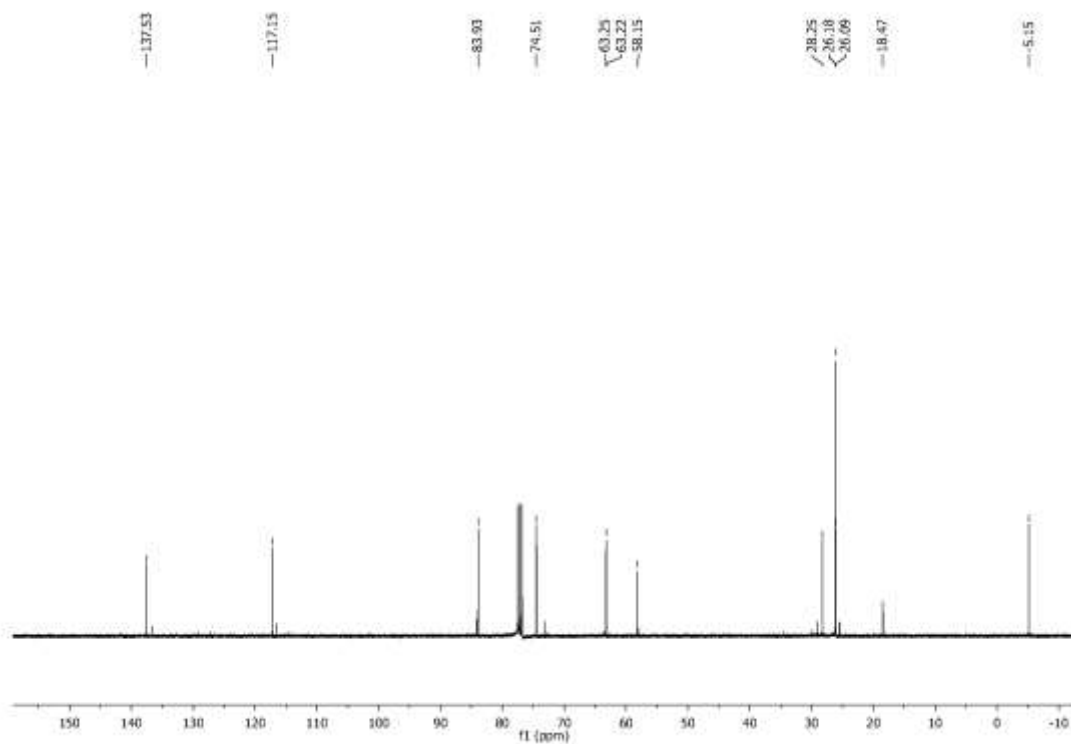



**Figure S22:**  $^1\text{H}$  NMR spectrum of compound **19**.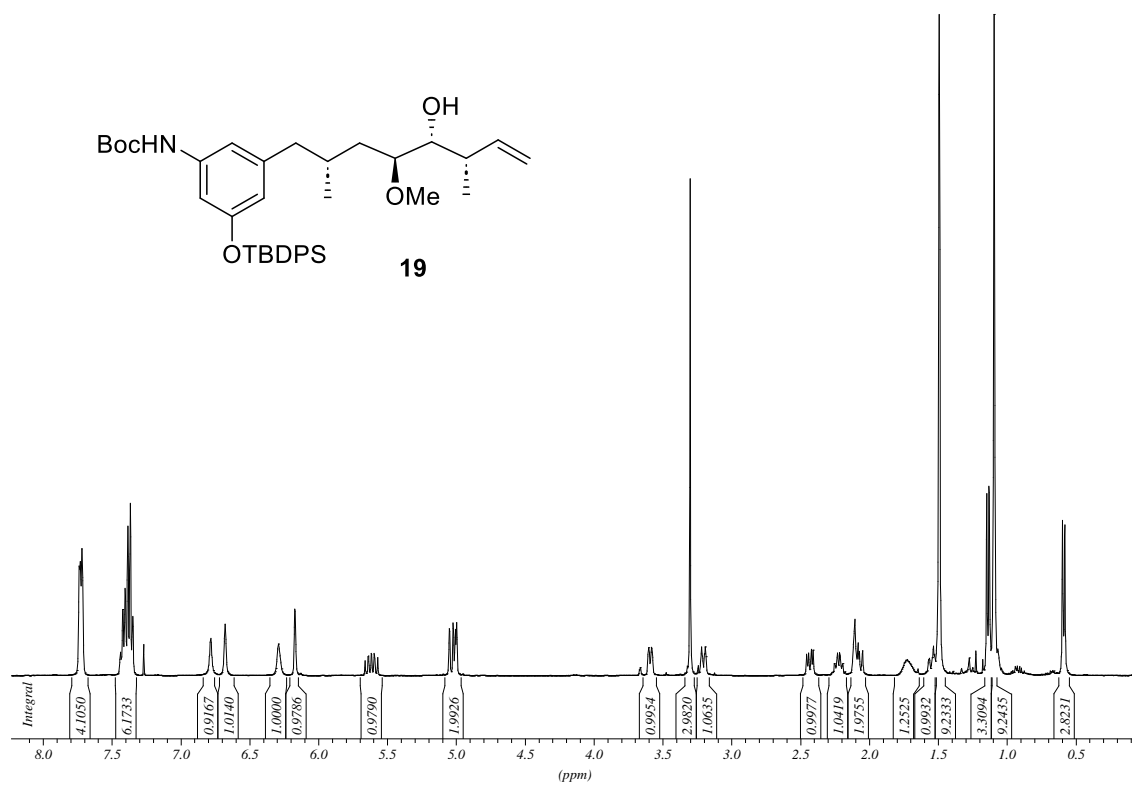**Figure S23:**  $^{13}\text{C}$  NMR spectrum of compound **19**.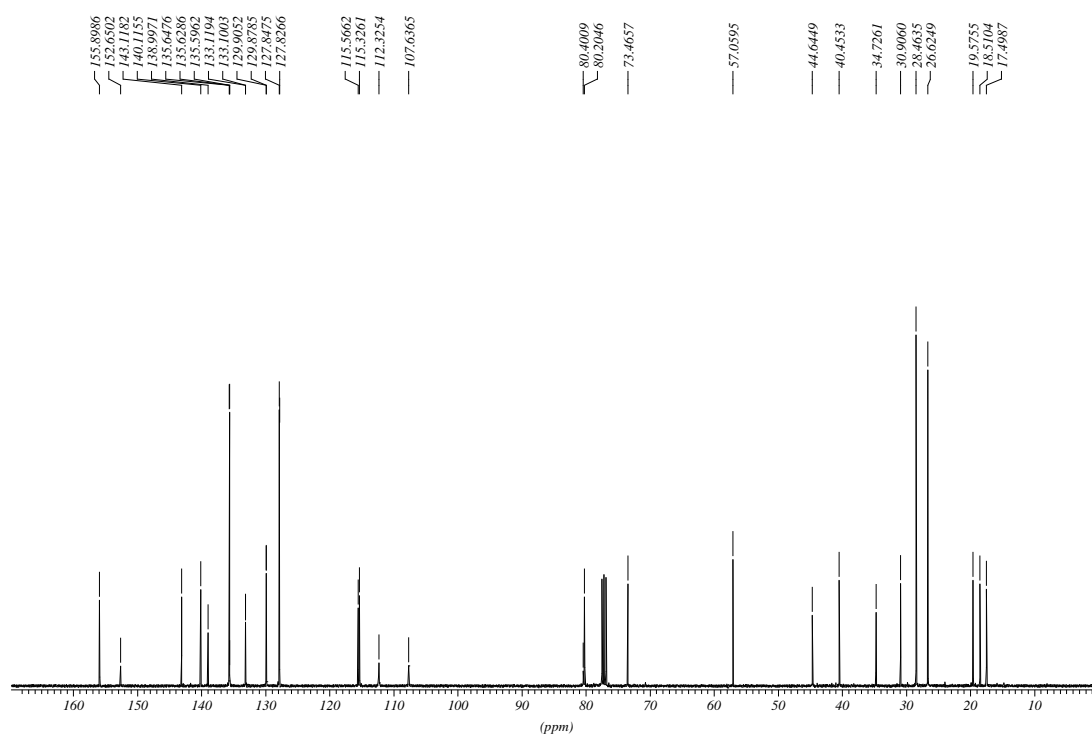

**Figure S24:**  $^1\text{H}$  NMR spectrum of compound **25**.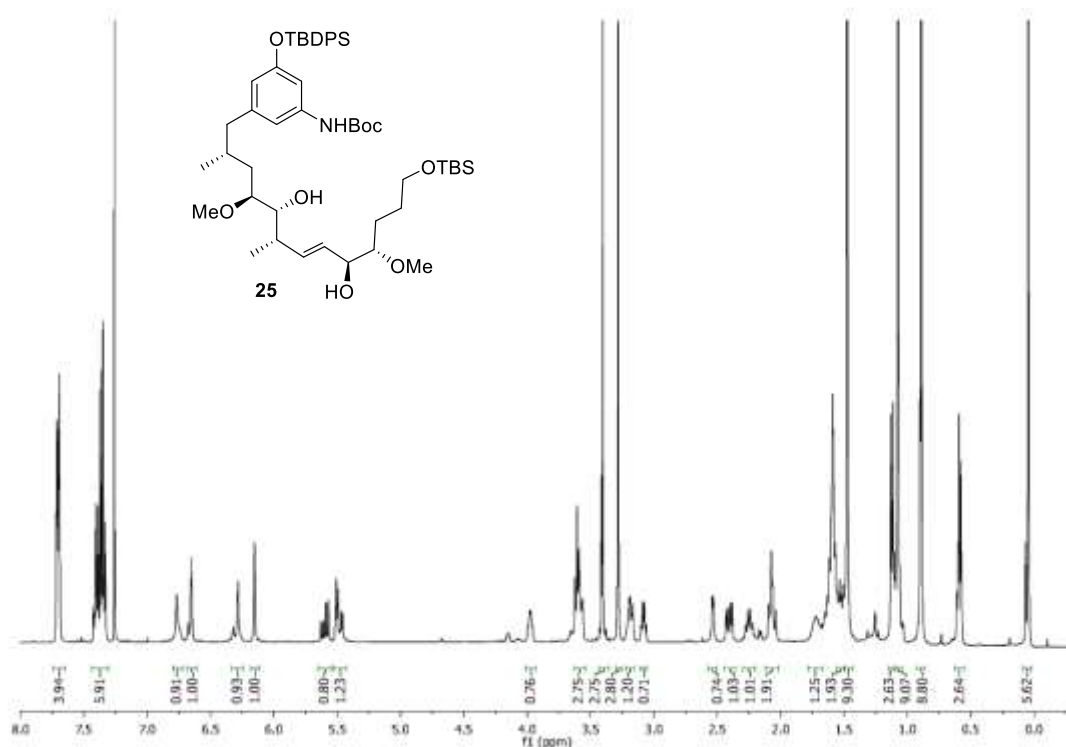**Figure S25:**  $^{13}\text{C}$  NMR spectrum of compound **25**.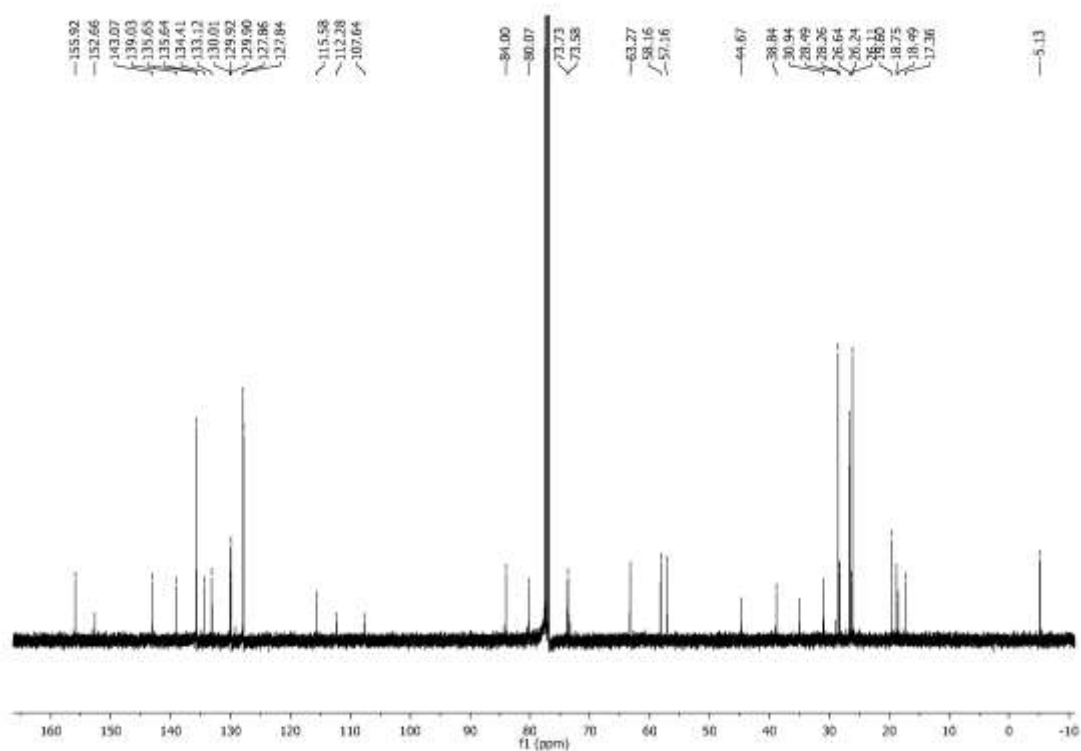

**Figure S26:**  $^1\text{H}$  NMR spectrum of compound **S20**.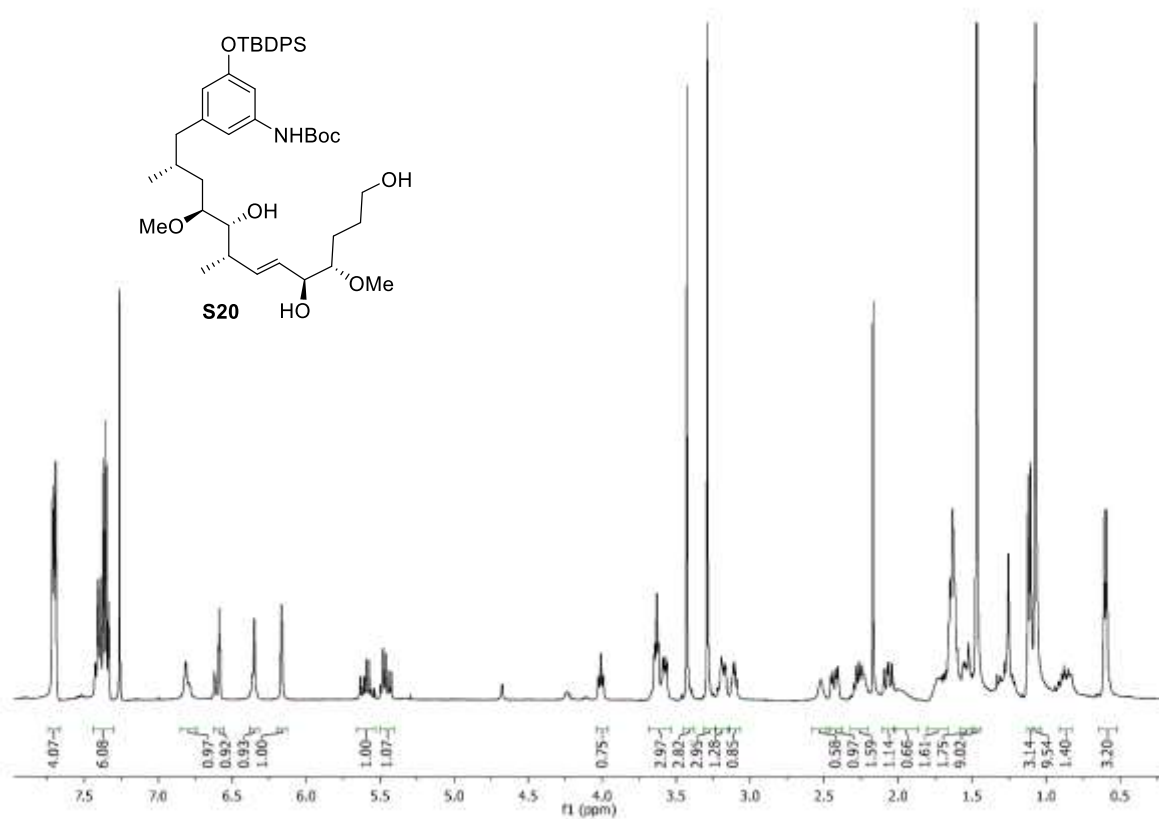**Figure S27:**  $^{13}\text{C}$  NMR spectrum of compound **S20**.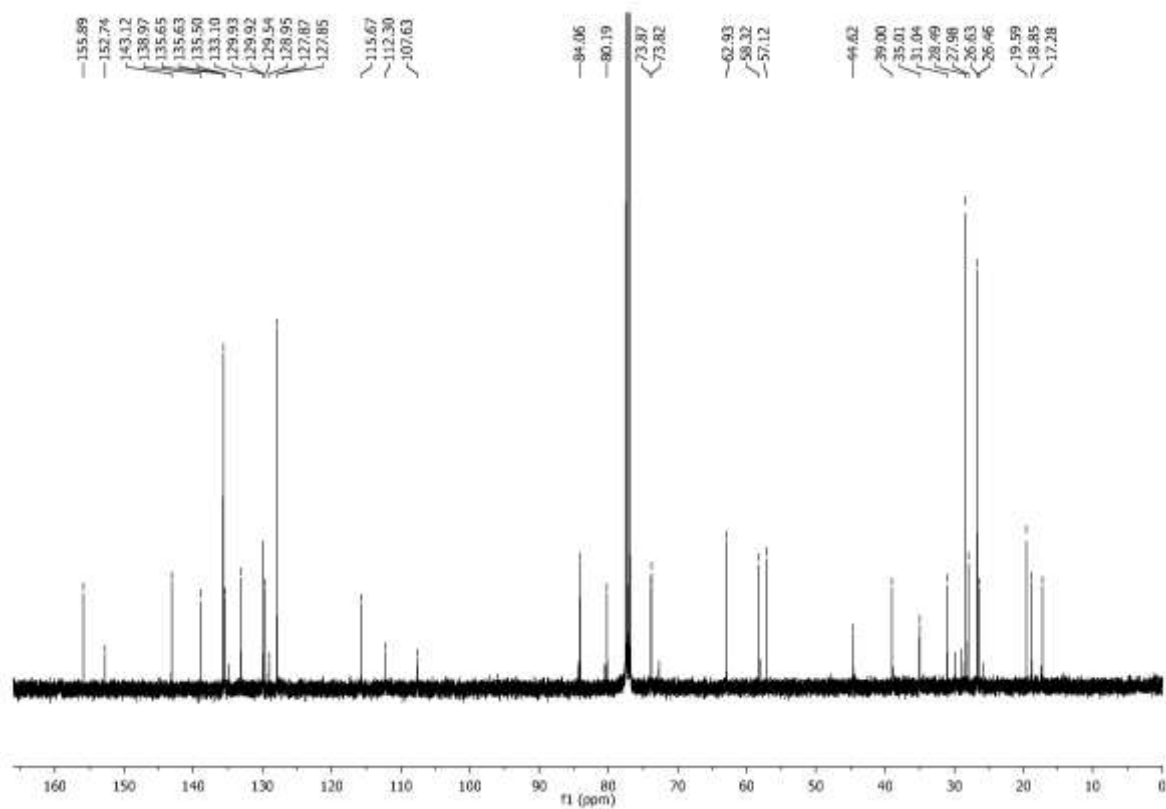

**Figure S28:**  $^1\text{H}$  NMR spectrum of compound **S21**.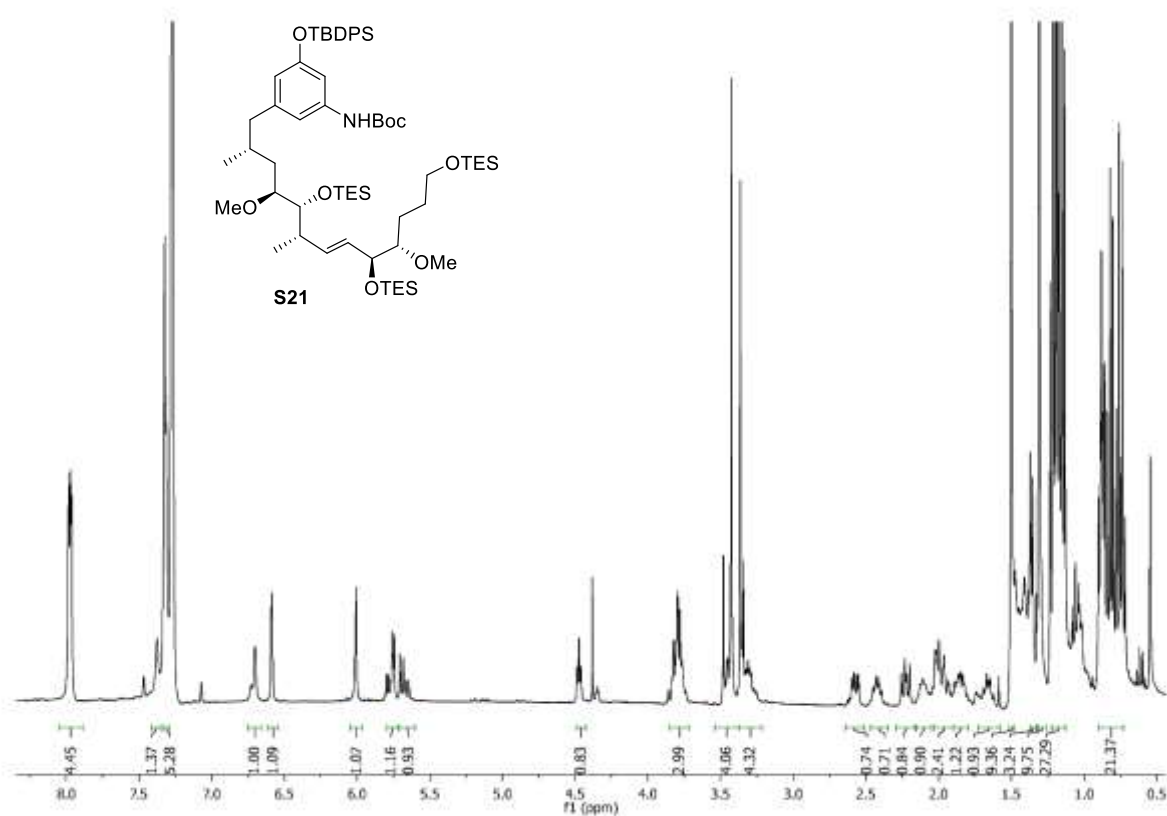**Figure S29:**  $^{13}\text{C}$  NMR spectrum of compound **S21**.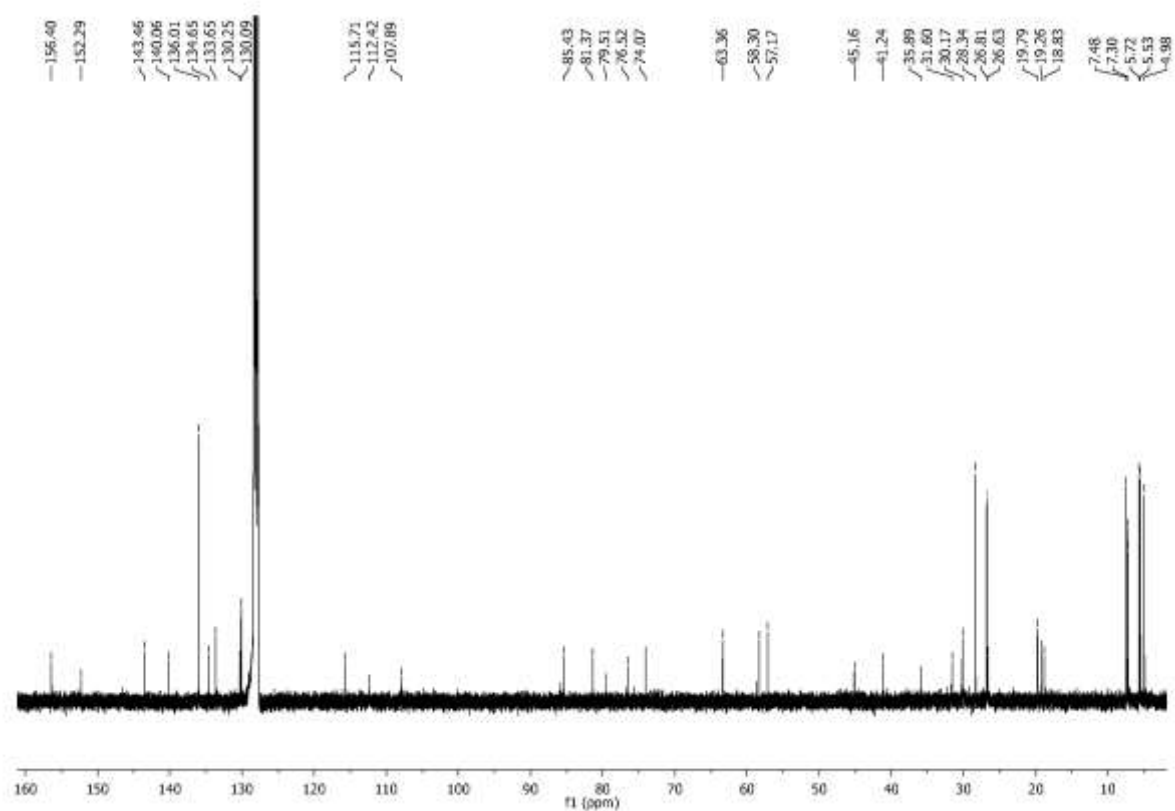

**Figure S30:**  $^1\text{H}$  NMR spectrum of compound **S22**.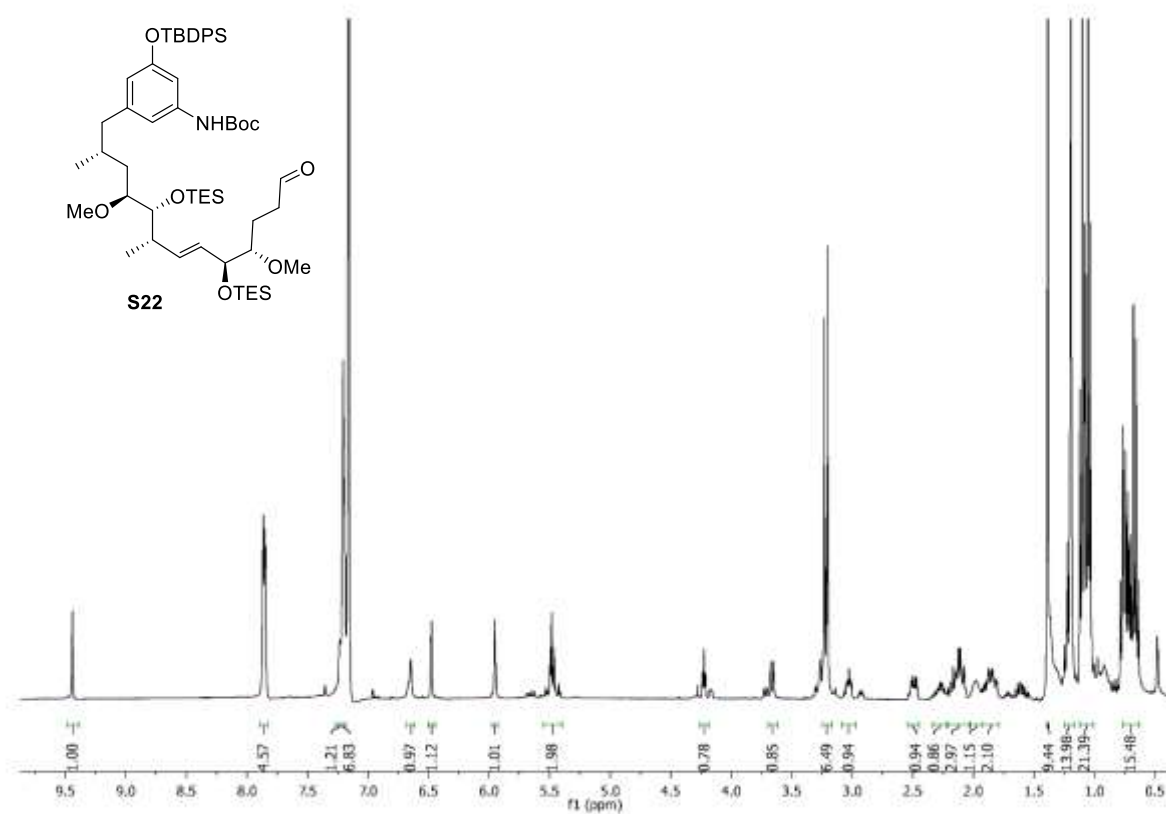**Figure S31:**  $^{13}\text{C}$  NMR spectrum of compound **S22**.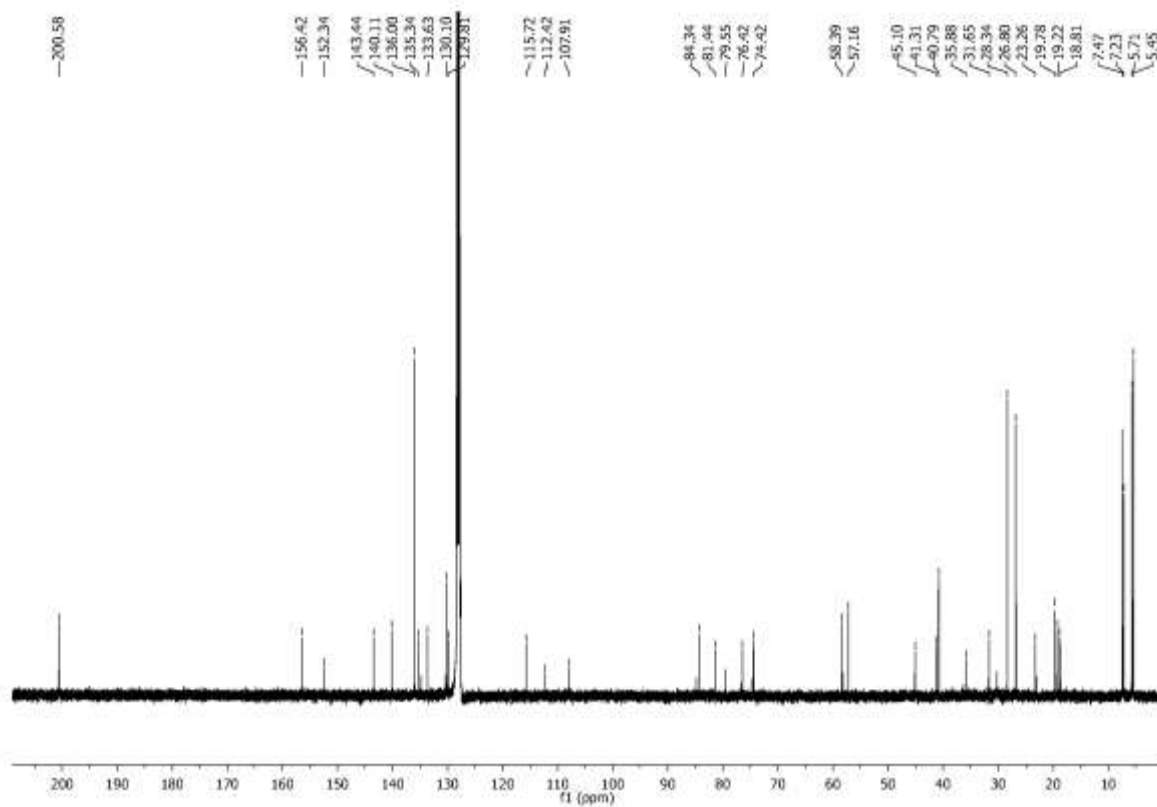



**Figure S32:**  $^1\text{H}$  NMR spectrum of compound **27a**.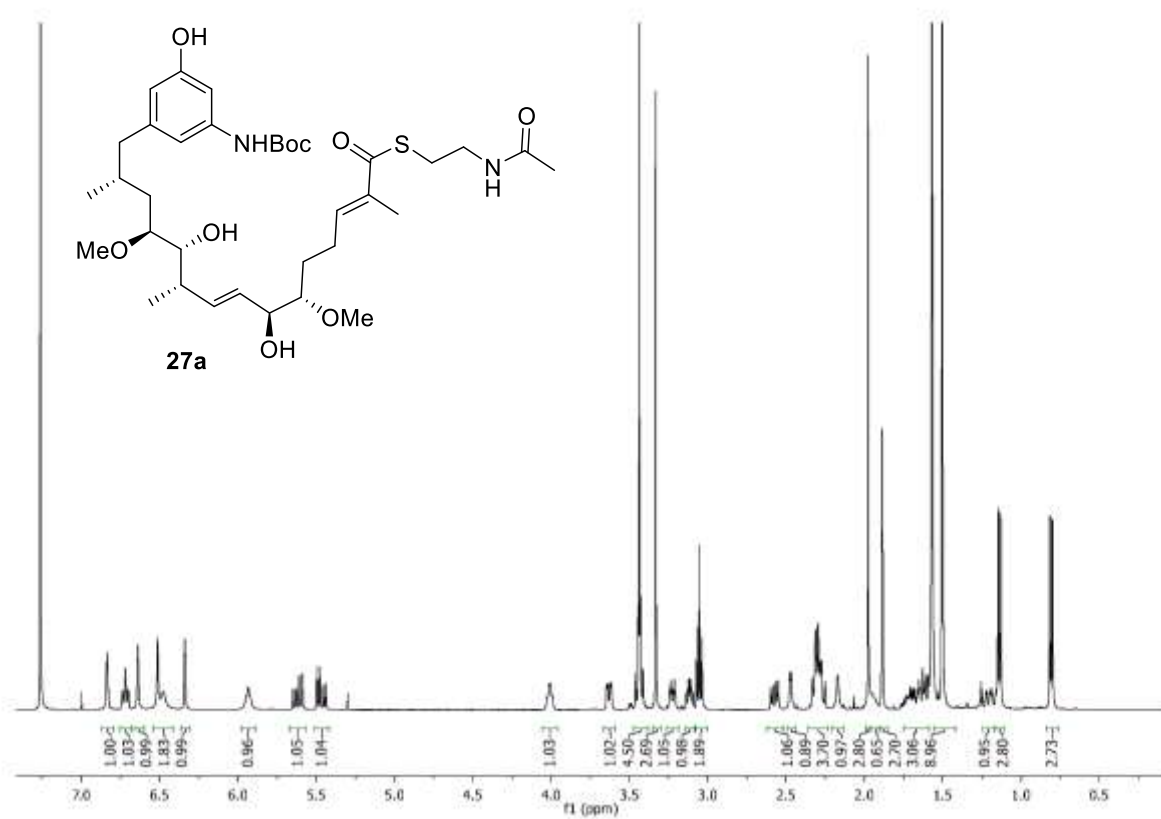**Figure S33:**  $^{13}\text{C}$  NMR spectrum of compound **27a**.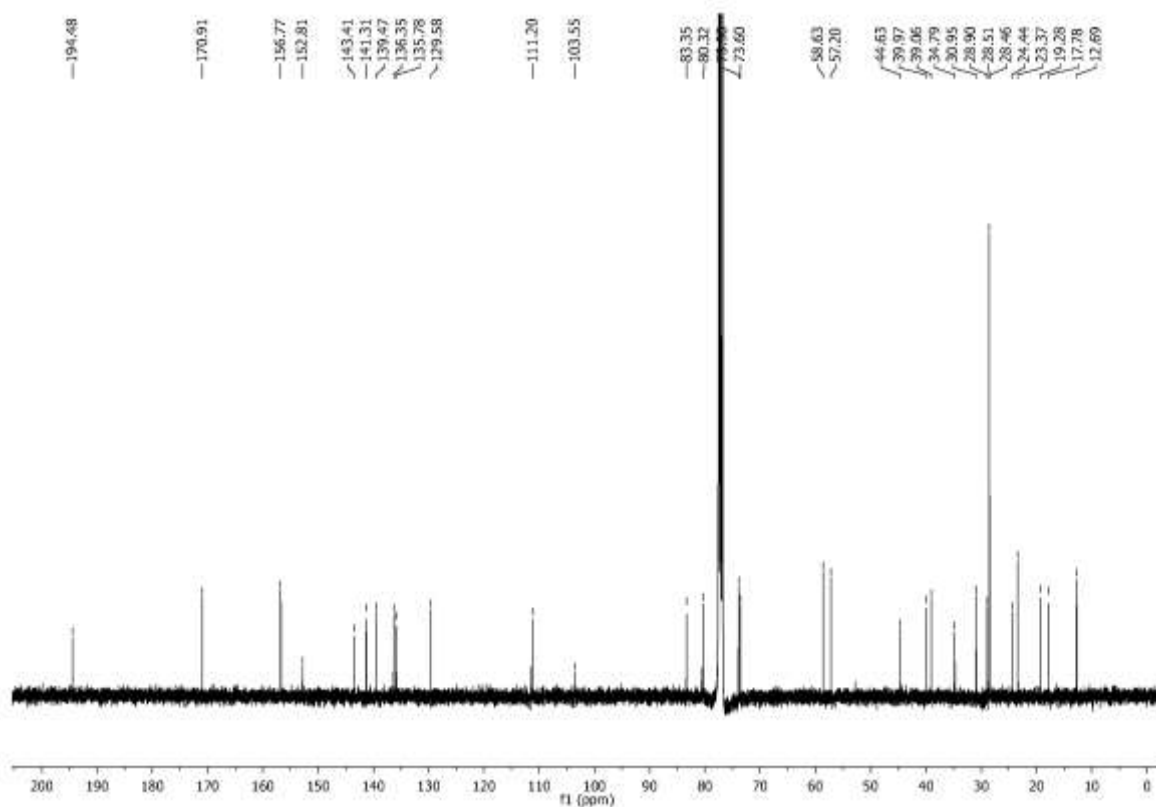

**Figure S34:**  $^1\text{H}$  NMR spectrum of compound **27b**.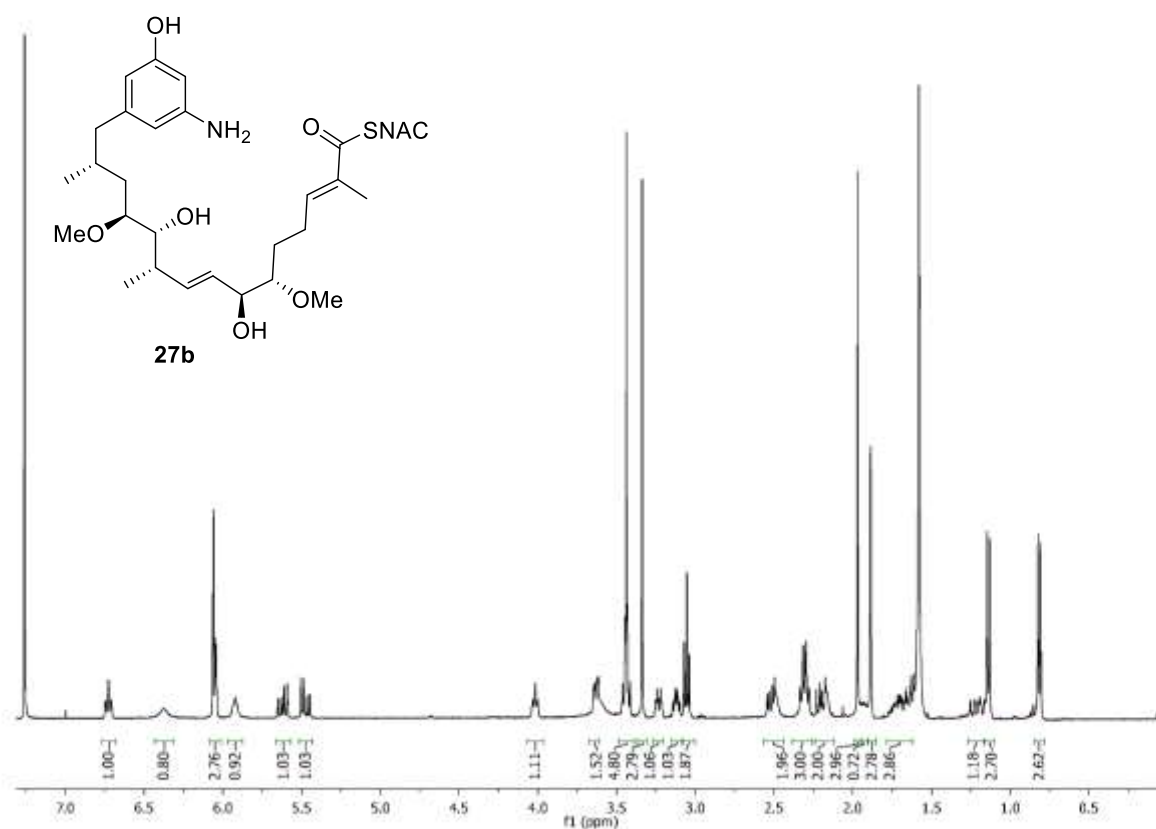**Figure S35:**  $^{13}\text{C}$  NMR spectrum of compound **27b**.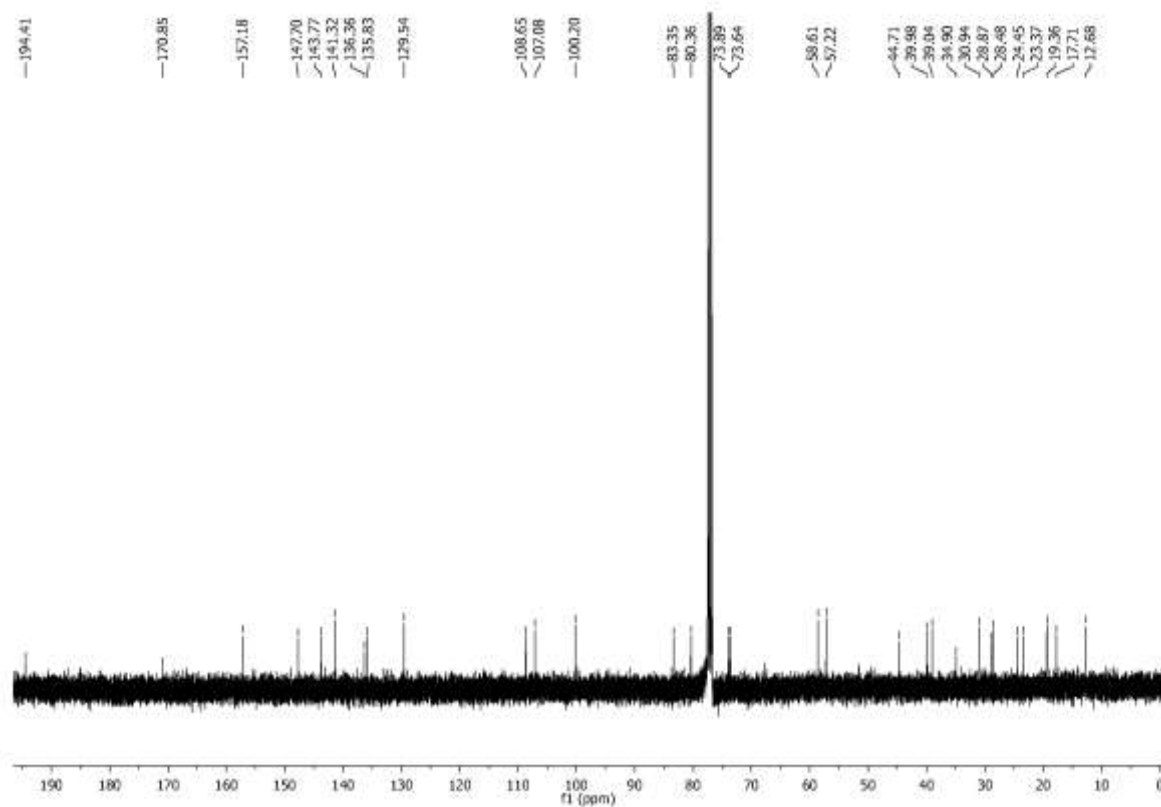

**Figure S36:**  $^1\text{H}$  NMR spectrum of compound **S23**.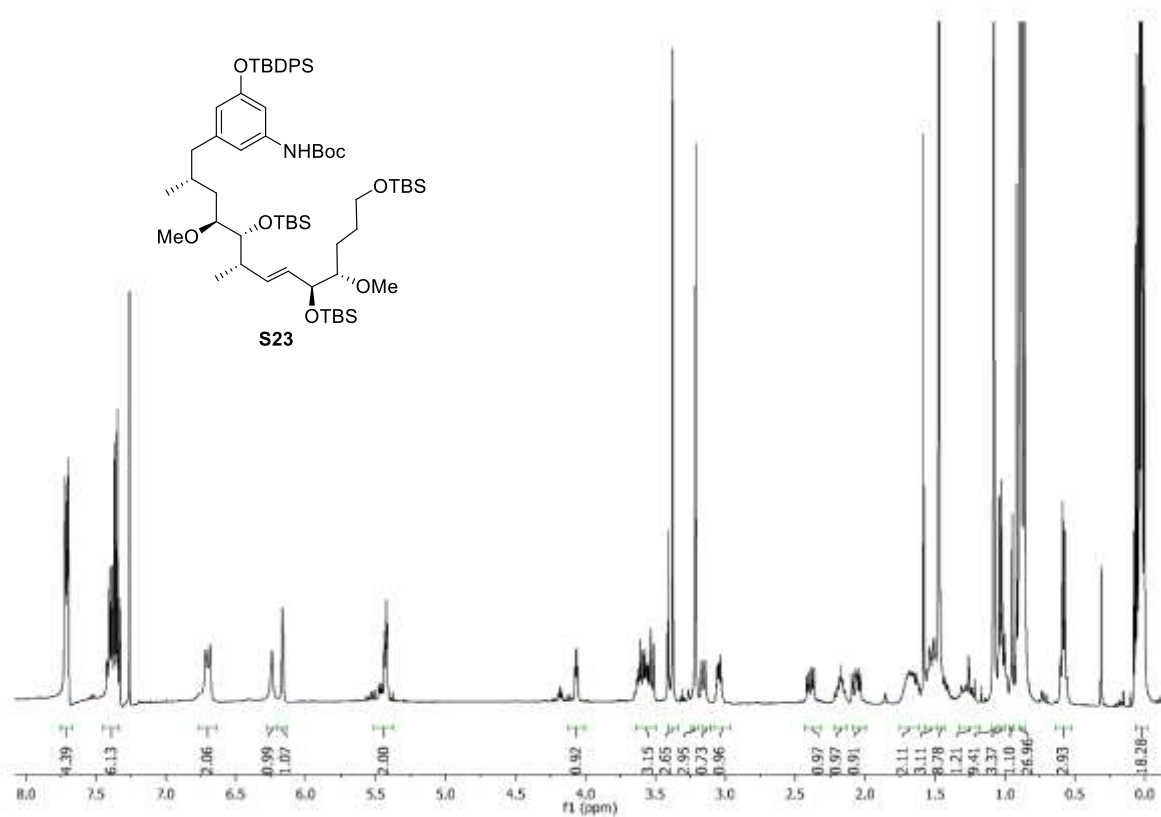**Figure S37:**  $^{13}\text{C}$  NMR spectrum of compound **S23**.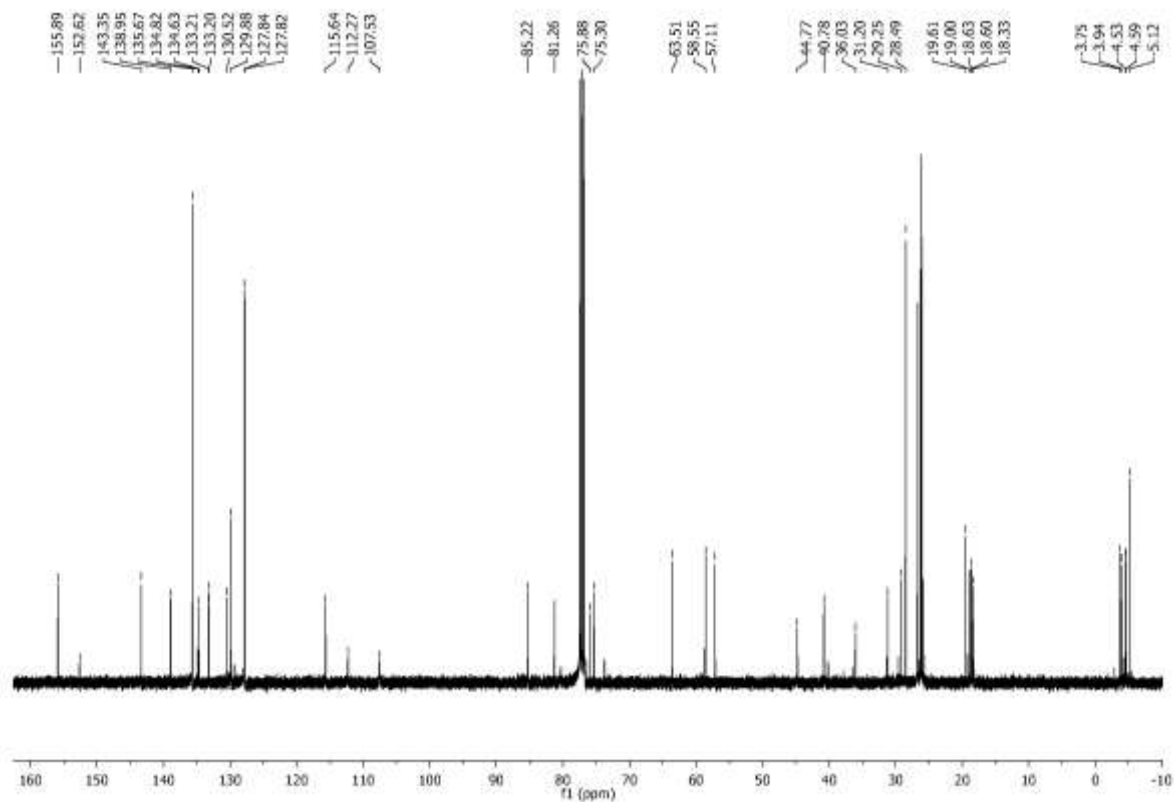

**Figure S38:**  $^1\text{H}$  NMR spectrum of compound **S24**.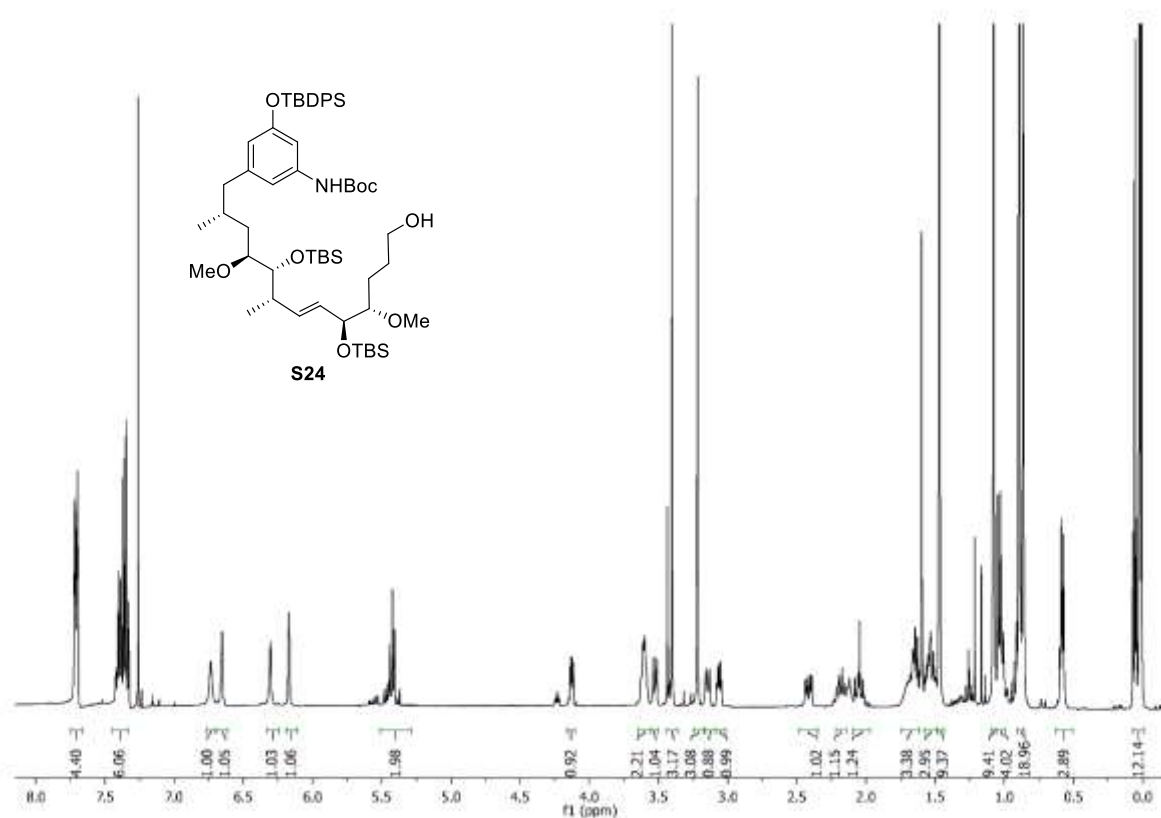**Figure S39:**  $^{13}\text{C}$  NMR spectrum of compound **S24**.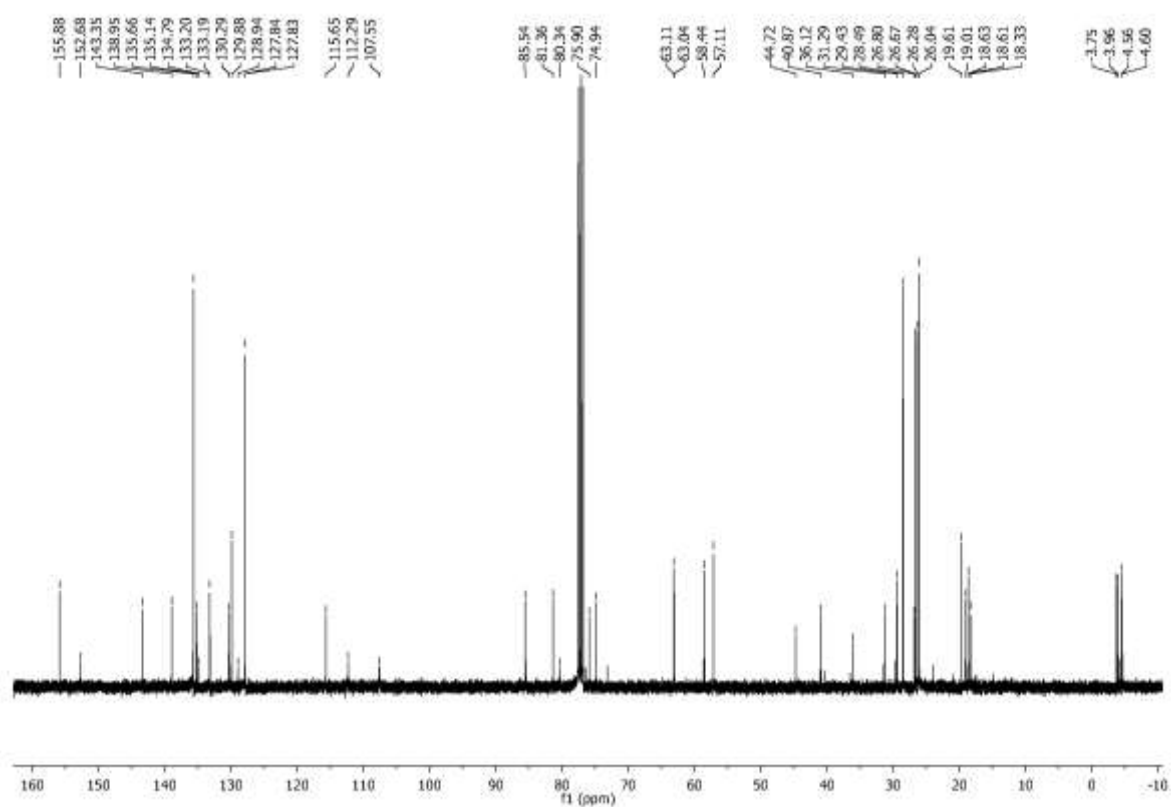

**Figure S40:**  $^1\text{H}$  NMR spectrum of compound **S25**.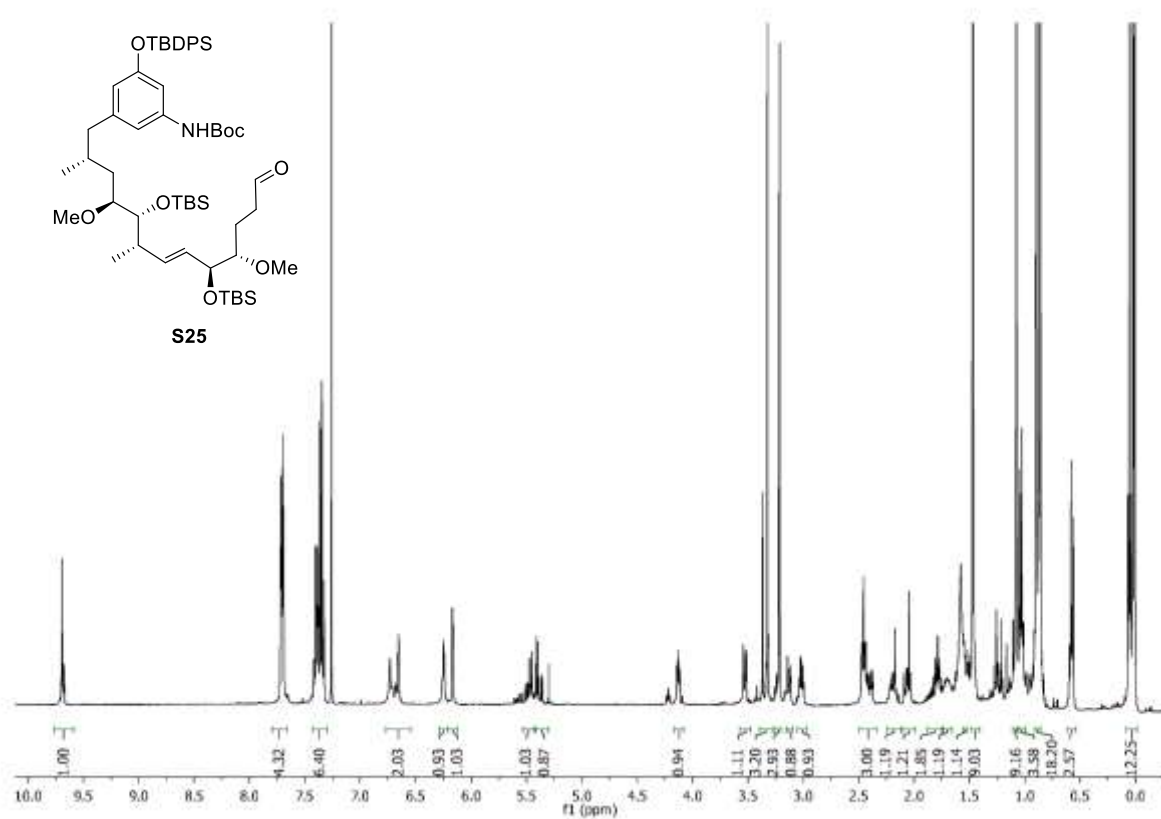**Figure S41:**  $^{13}\text{C}$  NMR spectrum of compound **S25**.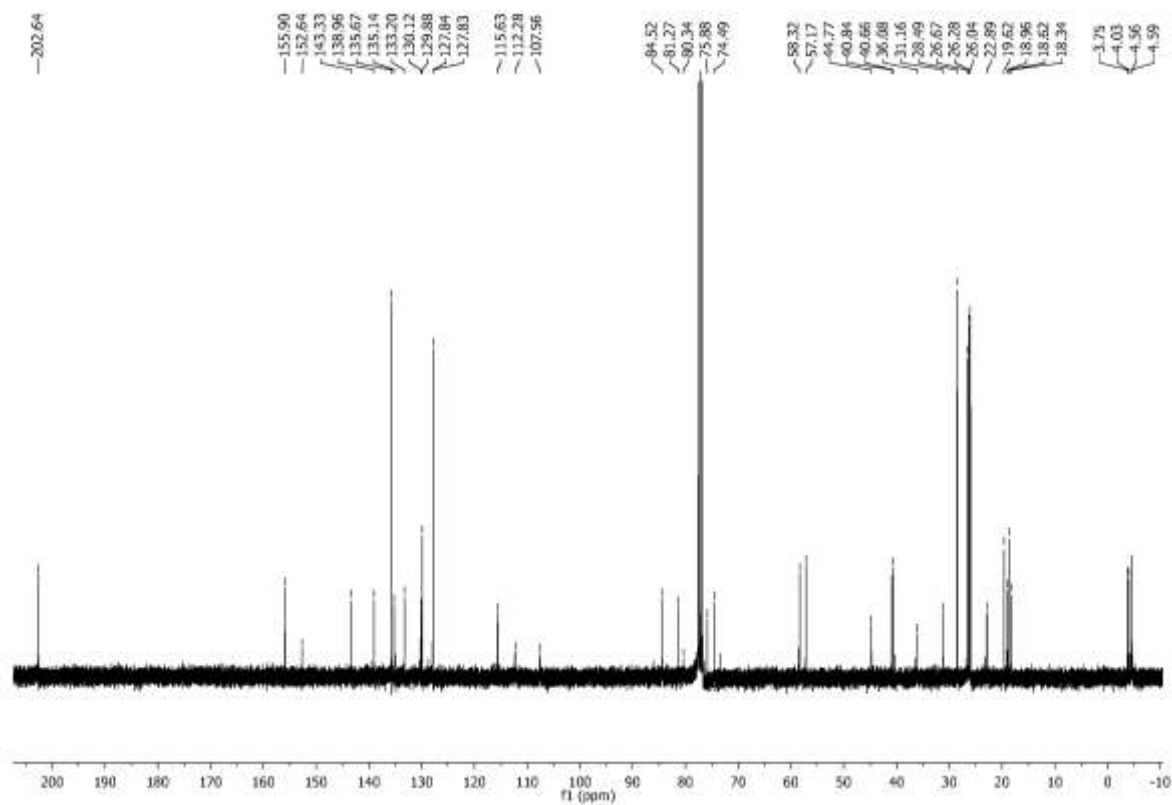



**Figure S42:**  $^1\text{H}$  NMR spectrum of compound **29**.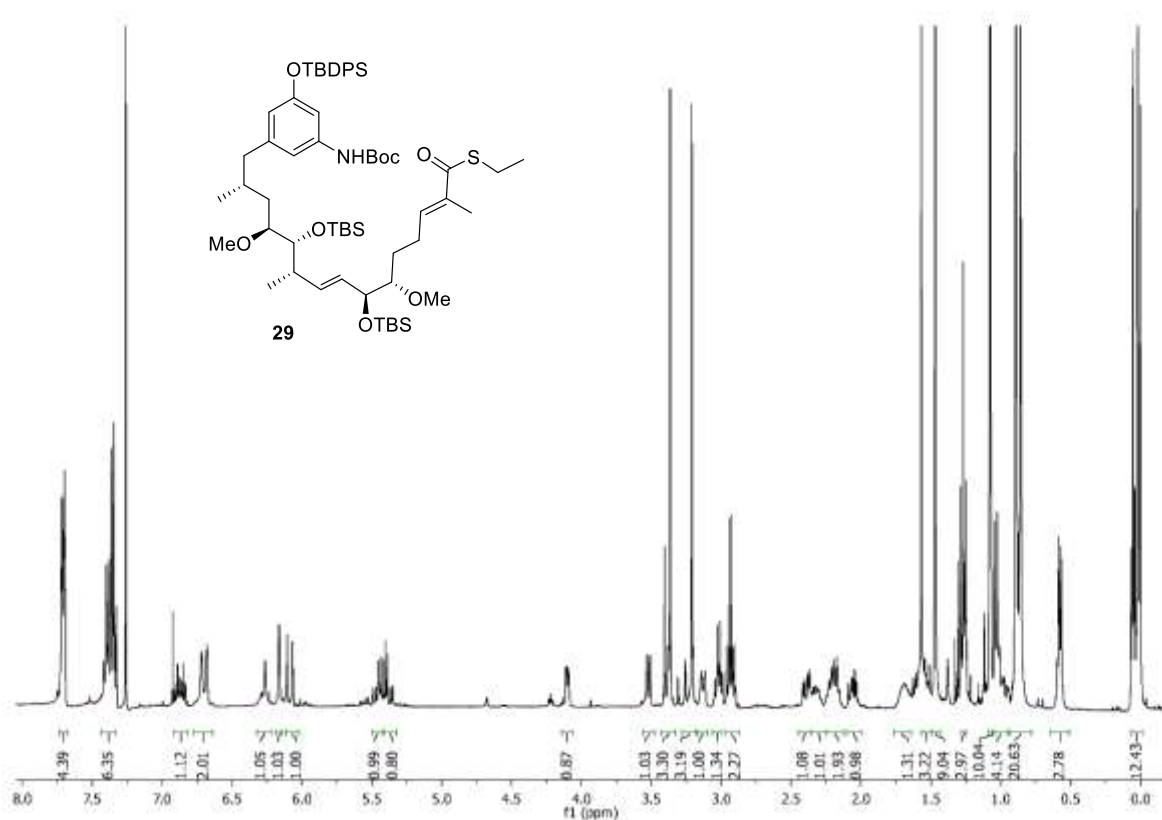**Figure S43:**  $^{13}\text{C}$  NMR spectrum of compound **29**.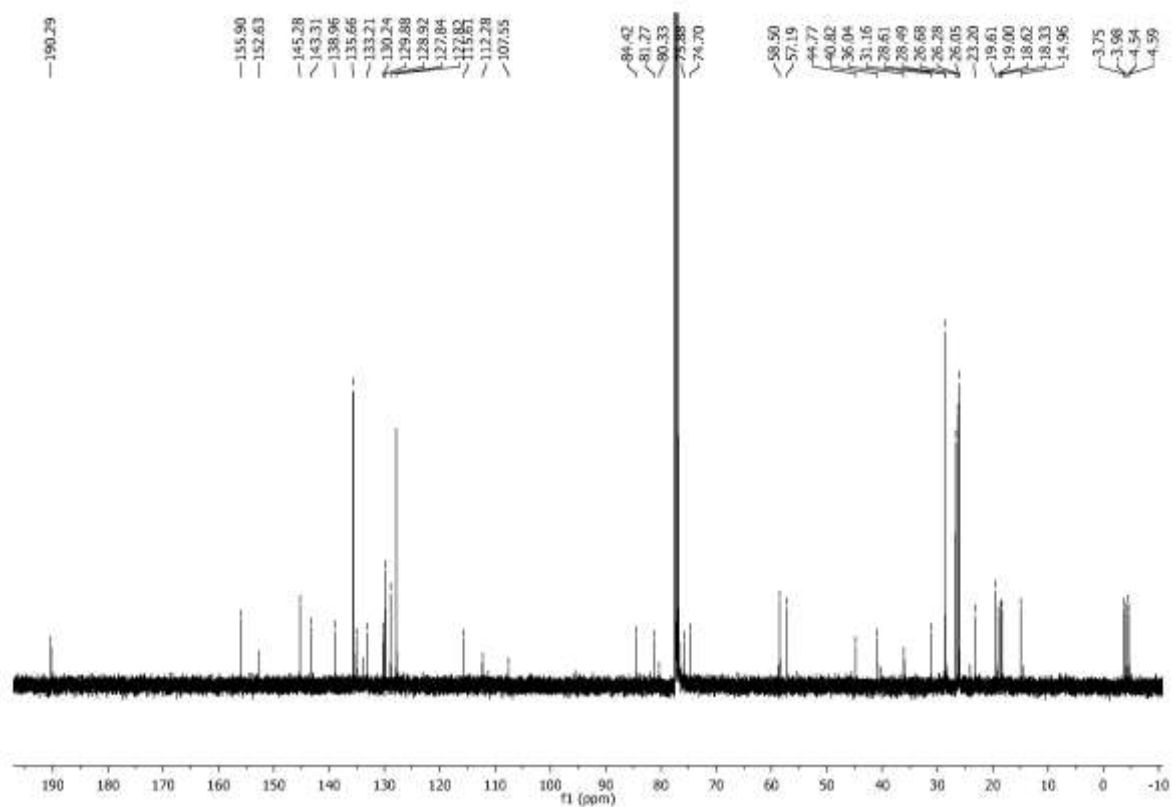

**Figure S44:**  $^1\text{H}$  NMR spectrum of compound **30**.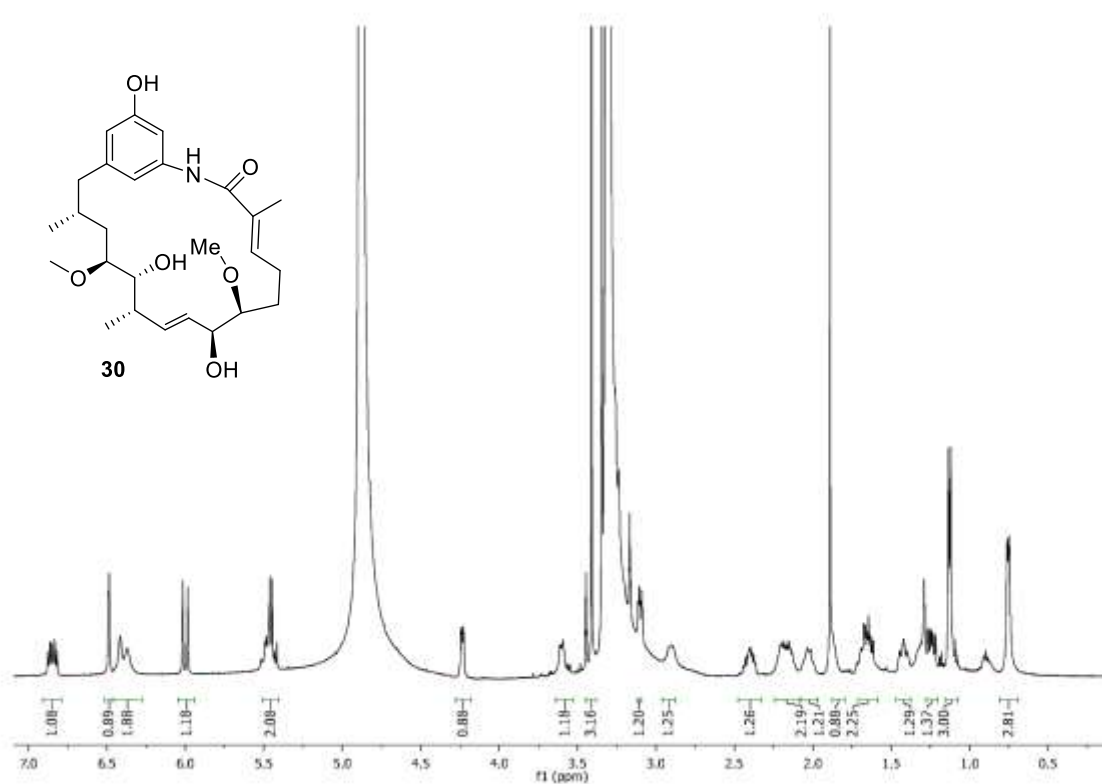**Figure S45:**  $^{13}\text{C}$  NMR spectrum of compound **30**.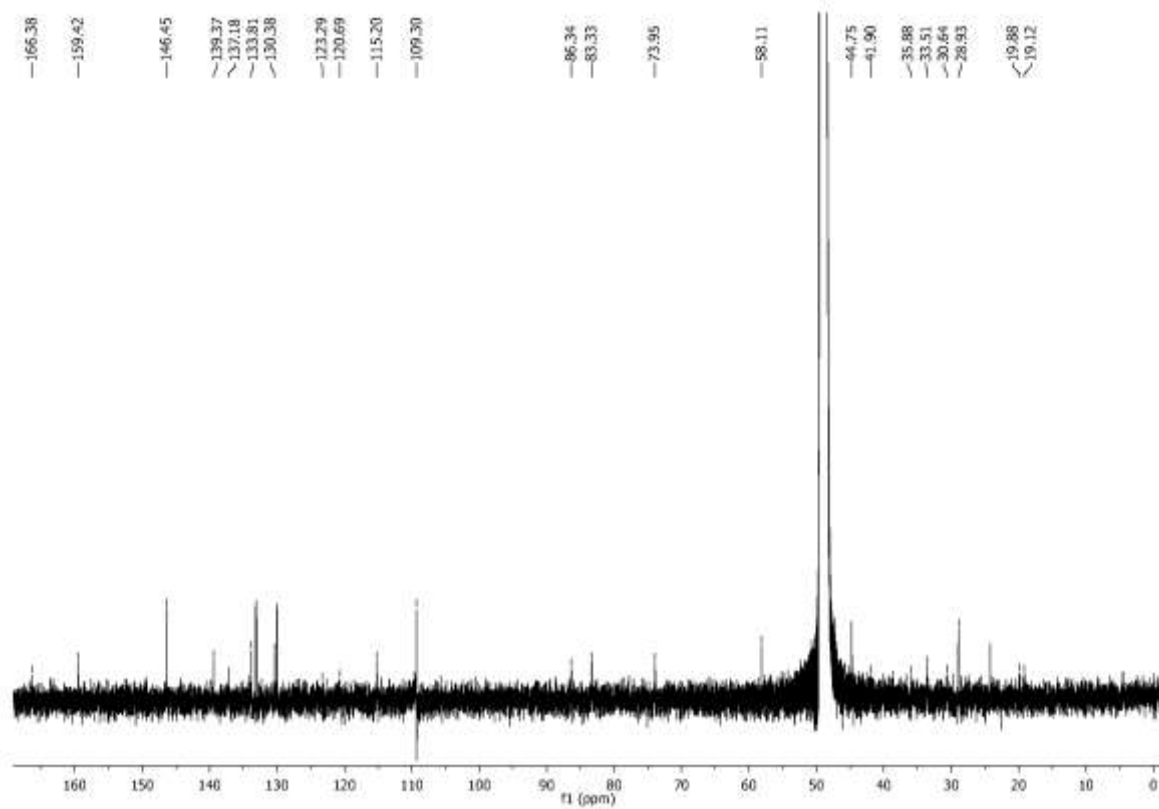

**Figure S46:** Uncropped scan of SDS-PAGE gel of the purified full-length *ShGdmF* after gel filtration.

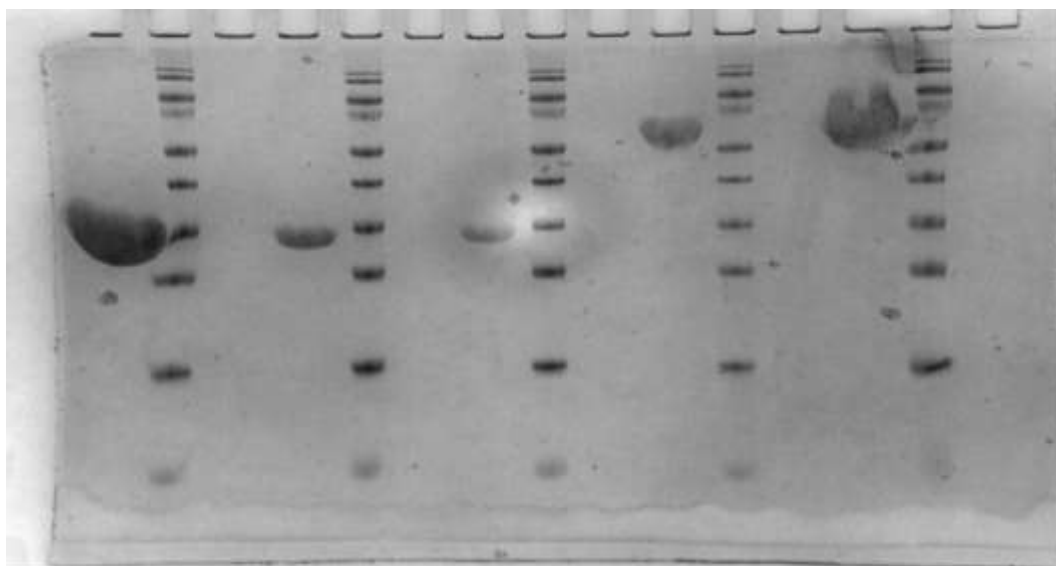

Supplement: MOESM1 [file 41467_2025_57013_MOESM1_ESM.pdf]
